# Supplementary material for: A diastereoselective synthesis of cyclopentanonesviaphotocatalytic reductive alkyltrifluoromethylation of ynones
Source: Royal Society of Chemistry journal article supplement (doi:10.1039/d2qo01101h), 2022-01-01

*Electronic Supplementary Information to*

**A diastereoselective synthesis of cyclopentanones via photocatalytic reductive  
alkyltrifluoromethylation of ynones**

Jiayan Qiu,<sup>†</sup> Siya Le,<sup>†</sup> Jingwen Su, Yi Liu, Yulu Zhou, Hanliang Zheng, Yihui Bai,  
and Gangguo Zhu\*

*Key Laboratory of the Ministry of Education for Advanced Catalysis Materials, Department of  
Chemistry, Zhejiang Normal University, 688 Yingbin Road, Jinhua 321004, P. R. China.*

*\*email: gangguo@zjnu.cn*

**Contents**

|                                                                       |                |
|-----------------------------------------------------------------------|----------------|
| <b>1. General Information.....</b>                                    | <b>S2</b>      |
| <b>2. General Procedures for Experiments and Analytical Data.....</b> | <b>S2-S13</b>  |
| <b>3. Mechanistic Experiments.....</b>                                | <b>S13-S16</b> |
| <b>4. NMR Spectra.....</b>                                            | <b>S17-S55</b> |
| <b>5. X-Ray Crystallographic Data.....</b>                            | <b>S56</b>     |

## 1. General Information

Unless otherwise noted, materials obtained from commercial suppliers were used directly without further purification. Ynones were prepared according to the method reported in the literature.<sup>1</sup> Melting points reported here were measured by a melting point instrument and were uncorrected. <sup>1</sup>H, <sup>13</sup>C, and <sup>19</sup>F NMR spectra were measured on a 600 MHz or 400 MHz NMR spectrometer. Chemical shifts are given in parts per million on the delta ( $\delta$ ) scale, and the coupling constants are given in hertz. <sup>1</sup>H NMR chemical shifts were determined relative to the internal standard tetramethylsilane (TMS) at 0.00 ppm, <sup>13</sup>C NMR shifts were determined relative to the residual solvent peaks of CDCl<sub>3</sub> at  $\delta$  77.00 ppm, and <sup>19</sup>F NMR chemical shifts were determined relative to outside standard CFCl<sub>3</sub> at  $\delta$  0.00 ppm. High-resolution mass spectrometry (HRMS) analysis were carried out using a TOF MS instrument with an APCI or ESI source. Flash column chromatography was carried out on the silica gel (200-300 mesh).

## 2. General Procedures for Experiments and Analytical Data

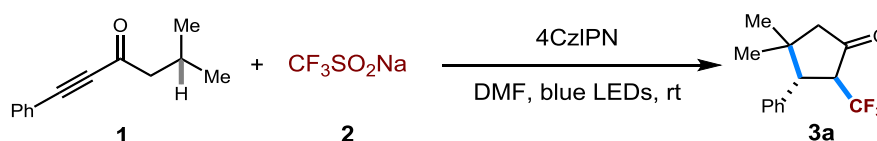

To a mixture of  $\text{CF}_3\text{SO}_2\text{Na}$  (62.4 mg, 0.4 mmol) and 4CzIPN (3.2 mg, 2 mol%) in 2 mL of DMF was added **1a** (37.2 mg, 0.2 mmol) under nitrogen atmosphere. After 20 h of irradiation at a distance of ~5 cm from 30 W blue LEDs (BESTLLON<sup>®</sup> lamps, 450 nm, 100% light intensity), the reaction mixture was quenched with water, extracted with EtOAc, washed with brine, dried over anhydrous  $\text{Na}_2\text{SO}_4$ , and concentrated. Column chromatography on silica gel (petroleum ethers/EtOAc = 100:1) gave 42 mg (82% yield) of **3a** as a white solid, mp 88-90 °C, dr >20:1. <sup>1</sup>H NMR (600 MHz, CDCl<sub>3</sub>)  $\delta$  7.41-7.37 (m, 2H), 7.36-7.32 (m, 1H), 7.22 (d,  $J$  = 7.2 Hz, 2H), 3.48 (dq,  $J$  = 12.2, 8.9 Hz, 1H), 3.39 (d,  $J$  = 12.4 Hz, 1H), 2.48 (s, 2H), 1.19 (s, 3H), 0.81 (s, 3H). <sup>13</sup>C NMR (151 MHz, CDCl<sub>3</sub>)  $\delta$  207.17, 135.71, 128.31, 127.52, 125.60, 124.64 (q,  $J$  = 279.5 Hz), 55.05 (q,  $J$  = 1.2 Hz), 54.22 (q,  $J$  = 26.3 Hz), 53.76 (q,  $J$  = 0.9 Hz), 38.15, 27.00, 22.85. <sup>19</sup>F NMR

<sup>1</sup> (a) Q.-X. Wang and J. A. May, *Org. Lett.*, 2020, **22**, 9579; (b) T. P. Reddy, J. Gujral, P. Roy and D. B. Ramachary, *Org. Lett.*, 2020, **22**, 9653.

(565 MHz, CDCl<sub>3</sub>)  $\delta$  -66.23. HRMS (ESI)  $m/z$ :  $[M + H]^+$  Calcd for C<sub>14</sub>H<sub>15</sub>F<sub>3</sub>O+H<sup>+</sup>: 257.1148; Found 257.1138.

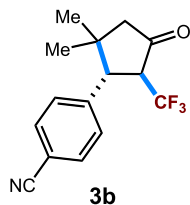

**Compound 3b:** 34 mg, 60% yield, white solid, mp 175-178 °C, dr >20:1; Flash column chromatography conditions: petroleum ethers/EtOAc = 100:1; <sup>1</sup>H NMR (600 MHz, CDCl<sub>3</sub>)  $\delta$  7.71-7.68 (m, 2H), 7.34 (d,  $J$  = 8.3 Hz, 2H), 3.51-3.36 (m, 2H), 2.49 (s, 2H), 1.18 (s, 3H), 0.80 (s, 3H). <sup>13</sup>C NMR (151 MHz, CDCl<sub>3</sub>)  $\delta$  205.60, 141.34, 132.19, 129.10, 124.35 (q,  $J$  = 279.4 Hz), 118.42, 111.74, 54.78 (q,  $J$  = 0.9 Hz), 54.10 (q,  $J$  = 26.7 Hz), 53.80 (q,  $J$  = 0.8 Hz), 38.39, 26.92, 22.76. <sup>19</sup>F NMR (565 MHz, CDCl<sub>3</sub>)  $\delta$  -66.22. HRMS (ESI)  $m/z$ :  $[M + H]^+$  Calcd for C<sub>15</sub>H<sub>14</sub>F<sub>3</sub>NO+H<sup>+</sup>: 282.1100; Found 282.1072.

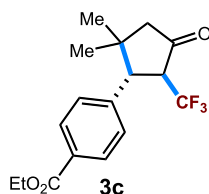

**Compound 3c:** 46 mg, 70% yield, white solid, mp 123-125 °C, dr >20:1; Flash column chromatography conditions: petroleum ethers/EtOAc = 40:1; <sup>1</sup>H NMR (600 MHz, CDCl<sub>3</sub>)  $\delta$  8.06 (d,  $J$  = 8.2 Hz, 2H), 7.29 (d,  $J$  = 8.3 Hz, 2H), 4.39 (q,  $J$  = 7.1 Hz, 2H), 3.49 (dq,  $J$  = 12.2, 8.6 Hz, 1H), 3.43 (d,  $J$  = 12.4 Hz, 1H), 2.48 (s, 2H), 1.40 (t,  $J$  = 7.1 Hz, 3H), 1.18 (s, 3H), 0.79 (s, 3H). <sup>13</sup>C NMR (151 MHz, CDCl<sub>3</sub>)  $\delta$  206.38, 166.21, 140.89, 129.93, 129.57, 128.32, 124.49 (q,  $J$  = 279.7 Hz), 98.89, 54.93, 54.19 (q,  $J$  = 26.6 Hz), 53.71, 38.29, 26.98, 22.82, 14.36. <sup>19</sup>F NMR (565 MHz, CDCl<sub>3</sub>)  $\delta$  -66.24. HRMS (ESI)  $m/z$ :  $[M + H]^+$  Calcd for C<sub>17</sub>H<sub>19</sub>F<sub>3</sub>O<sub>3</sub>+H<sup>+</sup>: 329.1359; Found 329.1360.

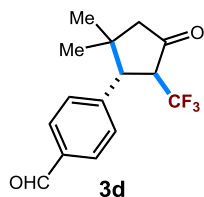

**Compound 3d:** 46 mg, 81% yield, white solid, mp 89-91 °C, dr >20:1; Flash column chromatography conditions: petroleum ethers/EtOAc = 40:1;  $^1\text{H}$  NMR (600 MHz,  $\text{CDCl}_3$ )  $\delta$  10.04 (s, 1H), 7.91 (d,  $J = 8.2$  Hz, 2H), 7.40 (d,  $J = 8.2$  Hz, 2H), 3.54-3.44 (m, 2H), 2.49 (s, 2H), 1.20 (s, 3H), 0.81 (s, 3H).  $^{13}\text{C}$  NMR (151 MHz,  $\text{CDCl}_3$ )  $\delta$  206.02, 191.60, 142.83, 135.80, 129.70, 129.02, 124.43 (q,  $J = 279.6$  Hz), 54.89 (q,  $J = 1.2$  Hz), 54.22 (q,  $J = 26.6$  Hz), 53.89 (q,  $J = 0.9$  Hz), 38.40, 27.01, 22.85.  $^{19}\text{F}$  NMR (565 MHz,  $\text{CDCl}_3$ )  $\delta$  -66.23. HRMS (ESI)  $m/z$ :  $[M + \text{H}]^+$  Calcd for  $\text{C}_{15}\text{H}_{15}\text{F}_3\text{O}_2 + \text{H}^+$  285.1097; Found 285.1095.

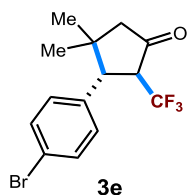

**Compound 3e:** 48 mg, 72% yield, white solid, mp 127-129 °C, dr >20:1; Flash column chromatography conditions: petroleum ethers/EtOAc = 100:1;  $^1\text{H}$  NMR (600 MHz,  $\text{CDCl}_3$ )  $\delta$  7.35 (d,  $J = 8.4$  Hz, 2H), 7.14 (d,  $J = 8.4$  Hz, 2H), 3.38 (dq,  $J = 12.2, 8.6$  Hz, 1H), 3.33 (d,  $J = 12.4$  Hz, 1H), 2.45 (s, 2H), 1.16 (s, 3H), 0.78 (s, 3H).  $^{13}\text{C}$  NMR (151 MHz,  $\text{CDCl}_3$ )  $\delta$  206.51, 134.27, 133.44, 129.58, 128.57, 124.51 (q,  $J = 279.4$  Hz), 54.88 (q,  $J = 0.9$  Hz), 54.18 (q,  $J = 26.3$  Hz), 53.21, 38.13, 26.90, 22.73.  $^{19}\text{F}$  NMR (565 MHz,  $\text{CDCl}_3$ )  $\delta$  -66.23. HRMS (ESI)  $m/z$ :  $[M + \text{H}]^+$  Calcd for  $\text{C}_{14}\text{H}_{14}\text{BrF}_3\text{O} + \text{H}^+$ : 335.0253; Found 335.0255.

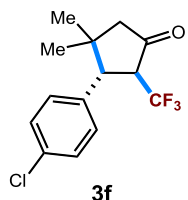

**Compound 3f:** 42 mg, 72% yield, white solid, mp 108-110 °C, dr >20:1; Flash column chromatography conditions: petroleum ethers/EtOAc = 100:1;  $^1\text{H}$  NMR (600 MHz,  $\text{CDCl}_3$ )  $\delta$  7.52-7.49 (m, 2H), 7.12-7.06 (m, 2H), 3.41-3.31 (m, 2H), 2.45 (s, 2H), 1.16 (s, 3H), 0.78 (s, 3H).  $^{13}\text{C}$  NMR (151 MHz,  $\text{CDCl}_3$ )  $\delta$  206.49, 134.27, 133.45, 129.58, 128.57, 124.51 (q,  $J = 279.5$  Hz),

54.88 (q,  $J = 1.0$  Hz), 54.24 (q,  $J = 26.4$  Hz), 53.21 (q,  $J = 0.9$  Hz), 38.13, 26.91, 22.73.  $^{19}\text{F}$  NMR (565 MHz,  $\text{CDCl}_3$ )  $\delta$  -66.22. HRMS (ESI)  $m/z$ :  $[M + \text{H}]^+$  Calcd for  $\text{C}_{14}\text{H}_{14}\text{ClF}_3\text{O} + \text{H}^+$ : 291.0758; Found 291.0760.

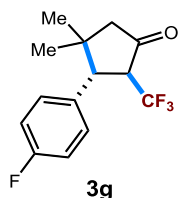

**Compound 3g:** 41 mg, 75% yield, white solid, mp 86-88 °C, dr >20:1; Flash column chromatography conditions: petroleum ethers/EtOAc = 100:1;  $^1\text{H}$  NMR (600 MHz,  $\text{CDCl}_3$ )  $\delta$  7.17 (dd,  $J = 8.6, 5.3$  Hz, 2H), 7.07 (dd,  $J = 11.9, 5.3$  Hz, 2H), 3.42-3.33 (m, 2H), 2.45 (s, 2H), 1.16 (s, 3H), 0.78 (s, 3H).  $^{13}\text{C}$  NMR (151 MHz,  $\text{CDCl}_3$ )  $\delta$  206.72, 162.17 (d,  $J = 246.2$  Hz), 131.46 (d,  $J = 3.3$  Hz), 129.76 (d,  $J = 7.9$  Hz), 124.58 (q,  $J = 279.4$  Hz), 115.32 (d,  $J = 21.4$  Hz), 54.89 (q,  $J = 1.4$  Hz), 54.39 (q,  $J = 26.3$  Hz), 53.09 (q,  $J = 1.2$  Hz), 38.10 (q,  $J = 1.0$  Hz), 26.90, 22.72.  $^{19}\text{F}$  NMR (565 MHz,  $\text{CDCl}_3$ )  $\delta$  -66.24, -115.01. HRMS (ESI)  $m/z$ :  $[M + \text{H}]^+$  Calcd for  $\text{C}_{14}\text{H}_{14}\text{F}_4\text{O} + \text{H}^+$ : 275.1054; Found 275.1055.

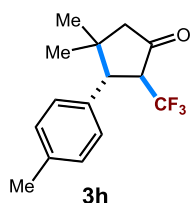

**Compound 3h:** 42 mg, 78% yield, white solid, mp 83-85 °C, dr >20:1; Flash column chromatography conditions: petroleum ethers/EtOAc = 100:1;  $^1\text{H}$  NMR (600 MHz,  $\text{CDCl}_3$ )  $\delta$  7.17 (d,  $J = 7.9$  Hz, 2H), 7.08 (d,  $J = 8.0$  Hz, 2H), 3.42 (dq,  $J = 12.2, 9.0$  Hz, 1H), 3.33 (d,  $J = 12.4$  Hz, 1H), 2.44 (s, 2H), 2.36 (s, 3H), 1.15 (s, 3H), 0.78 (s, 3H).  $^{13}\text{C}$  NMR (151 MHz,  $\text{CDCl}_3$ )  $\delta$  207.37, 137.16, 132.65, 129.01, 128.17, 124.68 (q,  $J = 279.6$  Hz), 55.06 (q,  $J = 1.2$  Hz), 54.24 (q,  $J = 26.2$  Hz), 53.41, 38.11, 27.00, 22.84, 21.06.  $^{19}\text{F}$  NMR (565 MHz,  $\text{CDCl}_3$ )  $\delta$  -66.22. HRMS (ESI)  $m/z$ :  $[M + \text{Na}]^+$  Calcd for  $\text{C}_{15}\text{H}_{17}\text{F}_3\text{O} + \text{Na}^+$ : 293.1124; Found 293.1123.

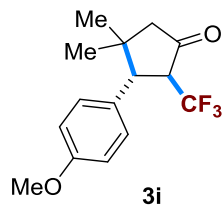

**Compound 3i:** 40 mg, 70% yield, white solid, mp 80-83 °C, dr >20:1; Flash column chromatography conditions: petroleum ethers/EtOAc = 100:1;  $^1\text{H}$  NMR (400 MHz,  $\text{CDCl}_3$ )  $\delta$  7.13–7.09 (m, 2H), 6.92–6.88 (m, 2H), 3.82 (s, 3H), 3.43–3.26 (m, 2H), 2.43 (s, 2H), 1.15 (s, 3H), 0.78 (s, 3H).  $^{13}\text{C}$  NMR (101 MHz,  $\text{CDCl}_3$ )  $\delta$  207.26 (q,  $J = 1.6$  Hz), 158.88, 129.25, 127.69, 124.67 (q,  $J = 280.5$  Hz), 113.67, 55.20, 54.96 (q,  $J = 1.3$  Hz), 54.31 (q,  $J = 26.2$  Hz), 53.03 (q,  $J = 1.2$  Hz), 38.12, 26.94, 22.75.  $^{19}\text{F}$  NMR (377 MHz,  $\text{CDCl}_3$ )  $\delta$  -66.24. HRMS (ESI)  $m/z$ :  $[M + \text{Na}]^+$  Calcd for  $\text{C}_{15}\text{H}_{17}\text{F}_3\text{O}_2 + \text{Na}^+$ : 309.1073; Found 309.1078.

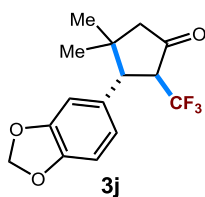

**Compound 3j:** 45 mg, 75% yield, white solid, mp 92-94 °C, dr >20:1; Flash column chromatography conditions: petroleum ethers/EtOAc = 60:1;  $^1\text{H}$  NMR (600 MHz,  $\text{CDCl}_3$ )  $\delta$  6.80 (d,  $J = 7.9$  Hz, 1H), 6.68-6.64 (m, 2H), 5.99 (s, 2H), 3.36-3.27 (m, 2H), 2.43 (d,  $J = 3.1$  Hz, 2H), 1.16 (s, 3H), 0.80 (s, 3H).  $^{13}\text{C}$  NMR (151 MHz,  $\text{CDCl}_3$ )  $\delta$  206.98, 147.68, 146.97, 124.62 (q,  $J = 279.4$  Hz), 121.84, 121.77 (q,  $J = 0.9$  Hz), 108.46, 108.12, 101.21, 54.97 (q,  $J = 2.8$  Hz), 54.48 (q,  $J = 26.1$  Hz), 53.56 (q,  $J = 1.4$  Hz), 38.17, 27.05, 22.90.  $^{19}\text{F}$  NMR (565 MHz,  $\text{CDCl}_3$ )  $\delta$  -66.24. HRMS (ESI)  $m/z$ :  $[M + \text{Na}]^+$  Calcd for  $\text{C}_{15}\text{H}_{15}\text{F}_3\text{O}_3 + \text{Na}^+$ : 323.0866; Found 323.0870.

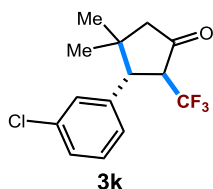

**Compound 3k:** 40 mg, 69% yield, white solid, mp 95-97 °C, dr >20:1; Flash column chromatography conditions: petroleum ethers/EtOAc = 100:1;  $^1\text{H}$  NMR (600 MHz,  $\text{CDCl}_3$ )  $\delta$  7.32-7.30 (m, 2H), 7.20 (s, 1H), 7.11-7.08 (m, 1H), 3.41 (dq,  $J = 12.2, 8.8$  Hz, 1H), 3.34 (d,  $J =$

12.4 Hz, 1H), 2.46 (s, 2H), 1.18 (s, 3H), 0.80 (s, 3H).  $^{13}\text{C}$  NMR (151 MHz,  $\text{CDCl}_3$ )  $\delta$  206.34, 137.90, 134.33, 129.60, 128.49, 127.81, 126.07, 124.48 (q,  $J = 279.7$  Hz), 54.90, 54.20 (q,  $J = 26.4$  Hz), 53.45 (q,  $J = 0.8$  Hz), 38.19, 26.98, 22.82.  $^{19}\text{F}$  NMR (565 MHz,  $\text{CDCl}_3$ )  $\delta$  -66.21. HRMS (ESI)  $m/z$ :  $[M + \text{H}]^+$  Calcd for  $\text{C}_{14}\text{H}_{14}\text{ClF}_3\text{O} + \text{H}^+$ : 291.0758; Found 291.0760.

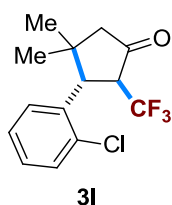

**Compound 3l:** 32 mg, 55% yield, colorless oil, dr >20:1; Flash column chromatography conditions: petroleum ethers/EtOAc = 100:1;  $^1\text{H}$  NMR (400 MHz,  $\text{CDCl}_3$ )  $\delta$  7.47-7.45 (m, 1H), 7.31-7.27 (m, 1H), 7.26-7.19 (m, 2H), 4.24 (d,  $J = 12.3$  Hz, 1H), 3.37-3.27 (m, 1H), 2.57-2.44 (m, 2H), 1.21 (s, 3H), 0.90 (s, 3H).  $^{13}\text{C}$  NMR (101 MHz,  $\text{CDCl}_3$ )  $\delta$  206.71 (q,  $J = 1.7$  Hz), 135.38, 134.10, 130.25, 128.53, 128.36, 126.49, 124.46 (q,  $J = 280.6$  Hz), 55.52 (q,  $J = 26.4$  Hz), 55.22 (q,  $J = 1.6$  Hz), 47.60 (q,  $J = 1.5$  Hz), 39.29, 27.22, 23.39.  $^{19}\text{F}$  NMR (377 MHz,  $\text{CDCl}_3$ )  $\delta$  -66.65. HRMS (ESI)  $m/z$ :  $[M + \text{H}]^+$  Calcd for  $\text{C}_{14}\text{H}_{14}\text{ClF}_3\text{O} + \text{H}^+$ : 291.0758; Found 291.0760.

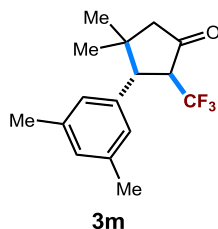

**Compound 3m:** 41 mg, 72% yield, white solid, mp 88-90 °C, dr >20:1; Flash column chromatography conditions: petroleum ethers/EtOAc = 100:1;  $^1\text{H}$  NMR (400 MHz,  $\text{CDCl}_3$ )  $\delta$  6.96 (s, 1H), 6.81 (s, 2H), 3.45 (dq,  $J = 12.2, 9.0$  Hz, 1H), 3.31 (d,  $J = 12.3$  Hz, 1H), 2.46 (s, 2H), 2.35 (s, 6H), 1.18 (s, 3H), 0.81 (s, 3H).  $^{13}\text{C}$  NMR (151 MHz,  $\text{CDCl}_3$ )  $\delta$  207.46, 137.64, 135.62, 129.17, 126.18, 123.77 (q,  $J = 279.6$  Hz), 55.15, 54.26 (q,  $J = 26.2$  Hz), 53.62, 38.04, 27.12, 22.98, 21.42.  $^{19}\text{F}$  NMR (377 MHz,  $\text{CDCl}_3$ )  $\delta$  -66.21. HRMS (ESI)  $m/z$ :  $[M + \text{H}]^+$  Calcd for  $\text{C}_{16}\text{H}_{19}\text{F}_3\text{O} + \text{H}^+$ : 285.1461; Found 285.1456.

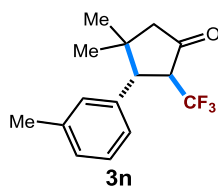

**Compound 3n:** 40 mg, 74% yield, white solid, mp 83-85 °C, dr >20:1; Flash column chromatography conditions: petroleum ethers/EtOAc = 100:1; <sup>1</sup>H NMR (600 MHz, CDCl<sub>3</sub>) δ 7.27-7.23 (m, 1H), 7.12 (d, *J* = 7.6 Hz, 1H), 7.00-6.95 (m, 2H), 3.44 (dq, *J* = 12.3, 9.0 Hz, 1H), 3.33 (d, *J* = 12.3 Hz, 1H), 2.45 (s, 2H), 2.37 (s, 3H), 1.16 (s, 3H), 0.78 (s, 3H). <sup>13</sup>C NMR (151 MHz, CDCl<sub>3</sub>) δ 207.35, 137.86, 135.66, 129.18, 128.27, 128.13, 125.27, 124.68 (q, *J* = 279.6 Hz), 55.09 (q, *J* = 0.9 Hz), 54.23 (q, *J* = 26.1 Hz), 53.68, 38.10, 27.06, 22.91, 21.55. <sup>19</sup>F NMR (565 MHz, CDCl<sub>3</sub>) δ -66.21. HRMS (ESI) *m/z*: [*M* + H]<sup>+</sup> Calcd for C<sub>15</sub>H<sub>17</sub>F<sub>3</sub>O+H<sup>+</sup>: 271.1304; Found 271.1309.

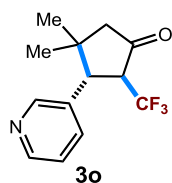

**Compound 3o:** 34 mg, 66% yield, black oil, dr >20:1; Flash column chromatography conditions: petroleum ethers/EtOAc = 10:1; <sup>1</sup>H NMR (600 MHz, CDCl<sub>3</sub>) δ 8.60 (d, *J* = 4.4 Hz, 1H), 8.54 (s, 1H), 7.55 (d, *J* = 7.9 Hz, 1H), 7.35 (dd, *J* = 7.8, 4.8 Hz, 1H), 3.45 (dq, *J* = 12.2, 8.6 Hz, 1H), 3.38 (d, *J* = 12.4 Hz, 1H), 2.49 (s, 2H), 1.19 (s, 3H), 0.81 (s, 3H). <sup>13</sup>C NMR (151 MHz, CDCl<sub>3</sub>) δ 207.33, 158.89, 129.28, 127.70, 124.68 (q, *J* = 279.6 Hz), 121.91, 55.23, 54.33 (q, *J* = 26.1 Hz), 53.05, 38.15, 26.96, 22.78. <sup>19</sup>F NMR (565 MHz, CDCl<sub>3</sub>) δ -66.23. HRMS (ESI) *m/z*: [*M* + H]<sup>+</sup> Calcd for C<sub>13</sub>H<sub>14</sub>F<sub>3</sub>NO+H<sup>+</sup>: 258.1100; Found 258.1106.

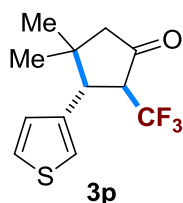

**Compound 3p:** 28 mg, 53% yield, yellow solid, mp 86-88 °C, dr = 15:1; Flash column chromatography conditions: petroleum ethers/EtOAc = 100:1; <sup>1</sup>H NMR (400 MHz, CDCl<sub>3</sub>) δ 7.36-7.32 (m, 1H), 7.07 (d, *J* = 2.7 Hz, 1H), 6.97 (d, *J* = 5.0 Hz, 1H), 3.48 (d, *J* = 12.1 Hz, 1H),



3.33 (dq,  $J = 12.0, 9.1$  Hz, 1H), 2.42 (s, 2H), 1.21 (s, 3H), 0.79 (s, 3H).  $^{13}\text{C}$  NMR (151 MHz,  $\text{CDCl}_3$ )  $\delta$  206.86, 137.11, 127.37, 125.68, 124.60 (q,  $J = 279.4$  Hz), 122.27, 55.23 (q,  $J = 26.4$  Hz), 54.77 (q,  $J = 1.1$  Hz), 49.30, 38.03, 27.11, 23.03.  $^{19}\text{F}$  NMR (377 MHz,  $\text{CDCl}_3$ )  $\delta$  -66.40 (d,  $J = 8.8$  Hz). HRMS (ESI)  $m/z$ :  $[M + \text{NH}_4]^+$  Calcd for  $\text{C}_{12}\text{H}_{13}\text{F}_3\text{OS} + \text{NH}_4^+$ : 280.0977; Found 280.0971.

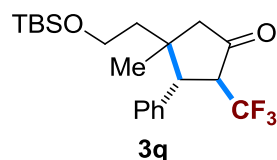

**Compound 3q**: 54 mg, 68% yield, colorless oil, dr >5:1:1:1; Flash column chromatography conditions: petroleum ethers/EtOAc = 40:1;  $^1\text{H}$  NMR (600 MHz,  $\text{CDCl}_3$ ) data of major isomer  $\delta$  7.39-7.34 (m, 2H), 7.34-7.30 (m, 1H), 7.21 (d,  $J = 7.2$  Hz, 2H), 3.75-3.70 (m, 1H), 3.66-3.62 (m, 1H), 3.48 (d,  $J = 12.3$  Hz, 1H), 3.44-3.37 (m, 1H), 2.62 (d,  $J = 17.9$  Hz, 1H), 2.52 (d,  $J = 17.9$  Hz, 1H), 1.74-1.69 (m, 1H), 1.66-1.61 (m, 1H), 0.89 (s, 9H), 0.81 (s, 3H), 0.04 (s, 3H), 0.03 (s, 3H).  $^{13}\text{C}$  NMR (151 MHz,  $\text{CDCl}_3$ ) data of major isomer  $\delta$  207.77, 135.93, 128.63, 128.30, 127.52, 124.73 (q,  $J = 270.3$  Hz), 59.71, 53.52 (q,  $J = 26.0$  Hz), 53.36, 53.22, 41.63, 40.24, 25.92, 20.75, 18.21, -5.47, -5.46.  $^{19}\text{F}$  NMR (565 MHz,  $\text{CDCl}_3$ ) data of major isomer  $\delta$  -66.14. HRMS (ESI)  $m/z$ :  $[M + \text{H}]^+$  Calcd for  $\text{C}_{21}\text{H}_{31}\text{F}_3\text{O}_2\text{Si} + \text{H}^+$ : 401.2118; Found 401.2121.

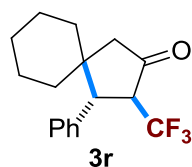

**Compound 3r**: 44 mg, 74% yield, white solid, mp 84-86 °C; dr >20:1; Flash column chromatography conditions: petroleum ethers/EtOAc = 100:1;  $^1\text{H}$  NMR (600 MHz,  $\text{CDCl}_3$ )  $\delta$  7.40-7.35 (m, 2H), 7.34-7.30 (m, 1H), 7.17 (d,  $J = 7.3$  Hz, 2H), 3.46 (dq,  $J = 12.6, 8.9$  Hz, 1H), 3.30 (d,  $J = 12.5$  Hz, 1H), 2.90-2.87 (m, 1H), 2.25-2.20 (m, 1H), 1.65-1.57 (m, 4H), 1.53-1.47 (m, 2H), 1.02-0.97 (m, 1H), 0.91-0.86 (m, 1H).  $^{13}\text{C}$  NMR (151 MHz,  $\text{CDCl}_3$ )  $\delta$  207.34, 135.57, 128.91, 128.19, 127.47, 124.74 (q,  $J = 279.7$  Hz), 54.82, 53.93 (q,  $J = 26.1$  Hz), 49.46 (q,  $J = 0.9$  Hz), 41.88, 36.72, 29.82, 25.43, 23.69, 21.91.  $^{19}\text{F}$  NMR (565 MHz,  $\text{CDCl}_3$ )  $\delta$  -66.18. HRMS (ESI)  $m/z$ :  $[M + \text{H}]^+$  Calcd for  $\text{C}_{17}\text{H}_{19}\text{F}_3\text{O} + \text{H}^+$ : 297.1461; Found 297.1460.

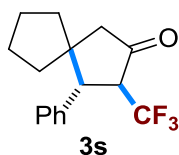

**Compound 3s:** 41 mg, 73% yield, white solid, mp 80-82 °C, dr >20:1; Flash column chromatography conditions: petroleum ethers/EtOAc = 100:1;  $^1\text{H}$  NMR (600 MHz,  $\text{CDCl}_3$ )  $\delta$  7.41-7.38 (m, 2H), 7.35-7.32 (m, 1H), 7.25-7.21 (m, 2H), 3.63 (d,  $J = 12.3$  Hz, 1H), 3.47-3.40 (m, 1H), 2.65-2.60 (m, 1H), 2.40-2.34 (m, 1H), 1.77-1.72 (m, 1H), 1.61-1.54 (m, 3H), 1.50-1.43 (m, 2H), 1.38-1.32 (m, 1H), 1.27-1.23 (m, 1H).  $^{13}\text{C}$  NMR (151 MHz,  $\text{CDCl}_3$ )  $\delta$  207.10, 136.01, 128.89, 128.31, 127.45, 124.51 (q,  $J = 279.6$  Hz), 55.31 (q,  $J = 26.2$  Hz), 52.82 (q,  $J = 0.7$  Hz), 51.05, 49.40, 36.04, 31.25, 23.24, 22.88.  $^{19}\text{F}$  NMR (565 MHz,  $\text{CDCl}_3$ )  $\delta$  -66.19. HRMS (ESI)  $m/z$ :  $[M + \text{H}]^+$  Calcd for  $\text{C}_{16}\text{H}_{17}\text{F}_3\text{O} + \text{H}^+$ : 283.1304; Found 283.1301.

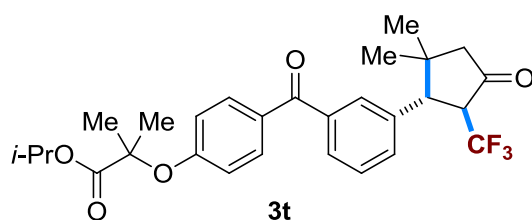

**Compound 3t:** 51 mg, 51% yield, yellow oil, dr >20:1; Flash column chromatography conditions: petroleum ethers/EtOAc = 10:1;  $^1\text{H}$  NMR (600 MHz,  $\text{CDCl}_3$ )  $\delta$  7.81-7.75 (m, 4H), 7.32 (d,  $J = 8.2$  Hz, 2H), 6.89-6.86 (m, 2H), 5.13-5.06 (m, 1H), 3.52 (dq,  $J = 12.5, 8.5$  Hz, 1H), 3.47 (d,  $J = 12.4$  Hz, 1H), 2.49 (s, 2H), 1.67 (s, 6H), 1.22 (d,  $J = 6.2$  Hz, 6H), 1.22 (s, 3H), 0.82 (s, 3H).  $^{13}\text{C}$  NMR (151 MHz,  $\text{CDCl}_3$ )  $\delta$  206.40, 194.91, 173.13, 159.69, 140.13, 137.43, 132.02, 130.40, 129.83, 128.22, 125.43 (q,  $J = 271.7$  Hz), 117.24, 79.42, 69.33, 58.45, 54.96, 54.24 (q,  $J = 26.5$  Hz), 53.74 (q,  $J = 0.7$  Hz), 53.43, 38.34, 27.01, 25.38, 25.37, 22.86, 21.52, 18.42.  $^{19}\text{F}$  NMR (565 MHz,  $\text{CDCl}_3$ )  $\delta$  -66.15. HRMS (ESI)  $m/z$ :  $[M + \text{H}]^+$  Calcd for  $\text{C}_{28}\text{H}_{31}\text{F}_3\text{O}_5 + \text{H}^+$ : 505.2196; Found 505.2198.

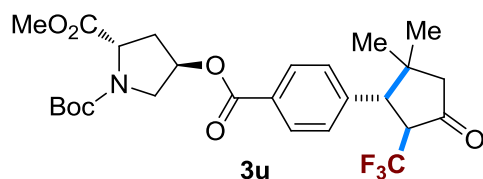

**Compound 3u:** 64 mg, 61% yield, white solid, mp 138-140 °C, as a 1.3:1 mixture of two rotamers;

Flash column chromatography conditions: petroleum ethers/EtOAc = 5:1;  $^1\text{H}$  NMR (600 MHz,  $\text{CDCl}_3$ )  $\delta$  8.04 (d,  $J = 7.9$  Hz, 2H), 7.32 (d,  $J = 7.8$  Hz, 2H), 5.59-5.53 (m, 1H), 4.55 (t,  $J = 7.8$  Hz, 0.45H, minor rotamer), 4.45 (t,  $J = 7.9$  Hz, 0.55H, major rotamer), 3.88-3.85 (m, 1H), 3.79 (s, 1.30H, minor rotamer), 3.78 (s, 1.70H, major rotamer), 3.73-3.71 (m, 1H), 3.54-3.44 (m, 2H), 2.59-2.50 (m, 3H), 2.39-2.31 (m, 1H), 1.48 (s, 3.90H, minor rotamer), 1.45 (s, 5.10H, major rotamer), 1.20 (s, 3H), 0.81 (s, 3H).  $^{13}\text{C}$  NMR (151 MHz,  $\text{CDCl}_3$ )  $\delta$  199.95, 183.70, 172.80, 165.19, 154.31, 130.16, 129.47, 127.67 (q,  $J = 279.4$  Hz), 80.75, 73.69, 58.00, 57.62, 52.37 (q,  $J = 29.6$  Hz), 52.27, 50.87, 43.04, 36.72, 33.93, 29.71, 28.25, 26.62.  $^{19}\text{F}$  NMR (565 MHz,  $\text{CDCl}_3$ )  $\delta$  -66.23. HRMS (ESI)  $m/z$ :  $[M + \text{Na}]^+$  Calcd for  $\text{C}_{26}\text{H}_{32}\text{F}_3\text{NO}_7 + \text{Na}^+$ : 550.2023; Found 550.2031.

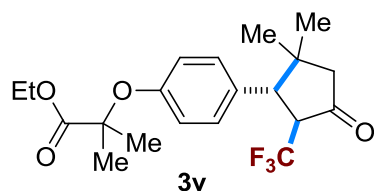

**Compound 3v:** 43 mg, 56% yellow oil, dr >20:1; Flash column chromatography conditions: petroleum ethers/EtOAc = 10:1;  $^1\text{H}$  NMR (600 MHz,  $\text{CDCl}_3$ )  $\delta$  7.05 (d,  $J = 8.6$  Hz, 2H), 6.83 (d,  $J = 8.7$  Hz, 2H), 4.23 (q,  $J = 7.1$  Hz, 2H), 3.36 (dq,  $J = 12.4, 8.8$  Hz, 1H), 3.29 (d,  $J = 12.4$  Hz, 1H), 2.42 (s, 2H), 1.61 (s, 6H), 1.21 (t,  $J = 7.1$  Hz, 3H), 1.13 (s, 3H), 0.76 (s, 3H).  $^{13}\text{C}$  NMR (151 MHz,  $\text{CDCl}_3$ )  $\delta$  207.15, 174.16, 154.89, 129.11, 128.94, 124.63 (q,  $J = 279.2$  Hz), 118.63, 79.19, 61.41, 54.95, 54.32 (q,  $J = 26.3$  Hz), 53.06, 38.10, 26.97, 25.45, 25.43, 22.78, 14.00.  $^{19}\text{F}$  NMR (565 MHz,  $\text{CDCl}_3$ )  $\delta$  -66.24. HRMS (ESI)  $m/z$ :  $[M + \text{Na}]^+$  Calcd for  $\text{C}_{20}\text{H}_{25}\text{F}_3\text{O}_4 + \text{Na}^+$ : 409.1597; Found 409.1599.

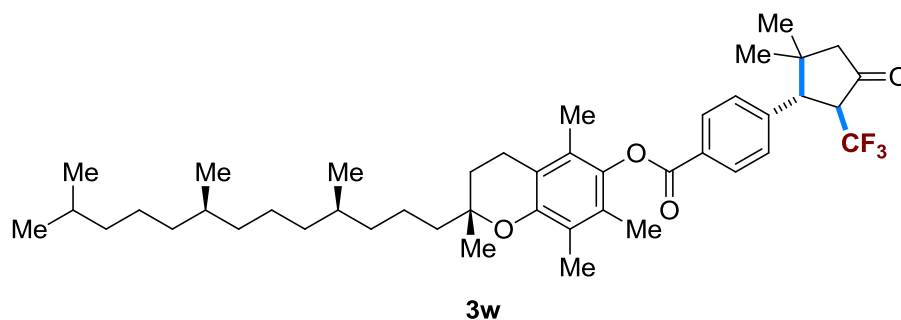

**Compound 3w:** 92 mg, 65% yellow oil, dr >19:1; Flash column chromatography conditions: petroleum ethers/EtOAc = 50:1;  $^1\text{H}$  NMR (600 MHz,  $\text{CDCl}_3$ )  $\delta$  8.25 (d,  $J = 8.2$  Hz, 2H), 7.36 (d,  $J$

= 8.2 Hz, 2H), 3.55-3.46 (m, 2H), 2.63 (t,  $J = 6.6$  Hz, 2H), 2.50 (s, 2H), 2.14-2.03 (m, 9H), 1.86-1.74 (m, 2H), 1.55-1.38 (m, 6H), 1.31-1.20 (m, 15H), 1.16-1.04 (m, 6H), 0.87-0.84 (m, 15H).  $^{13}\text{C}$  NMR (151 MHz,  $\text{CDCl}_3$ )  $\delta$  206.30, 164.77, 149.53, 141.58, 140.54, 130.16, 129.06, 128.59, 126.87, 125.12, 124.51 (q,  $J = 279.8$  Hz), 123.18, 117.51, 75.12, 54.97, 54.24 (q,  $J = 26.2$  Hz), 53.80, 39.38, 38.40, 37.46, 37.30, 32.82, 32.77 (q,  $J = 1.0$  Hz), 32.73, 32.69, 28.00, 27.02, 24.82, 24.47, 22.88, 22.74, 22.65, 21.05, 20.66, 19.77, 19.68, 13.13, 12.28, 11.88.  $^{19}\text{F}$  NMR (565 MHz,  $\text{CDCl}_3$ )  $\delta$  -66.17. HRMS (ESI)  $m/z$ :  $[M + \text{H}]^+$  Calcd for  $\text{C}_{44}\text{H}_{63}\text{F}_3\text{O}_4 + \text{H}^+$ : 713.4751; Found 713.4769.

#### Experimental Procedure for the Transformation of **3a** to **4a**

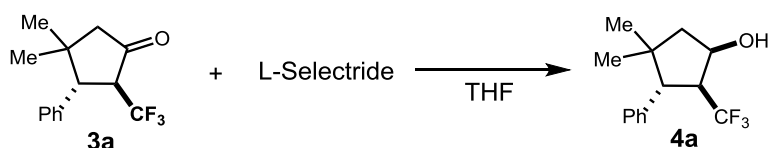

To a solution of **3a** (51.2 mg, 0.2 mmol) in 1 mL of dry THF was added L-Selectride (1.0 M in THF, 0.25 mL, 0.25 mmol) at  $-78$  °C. Upon warming to  $25$  °C over 2 h, the reaction mixture was quenched with saturated aqueous  $\text{NH}_4\text{Cl}$  solution, extracted with EtOAc, dried over anhydrous  $\text{Na}_2\text{SO}_4$ , and concentrated. Column chromatography on silica gel (petroleum ethers/EtOAc = 10:1) gave 39 mg (76% yield) of **4a** as a colorless oil, dr >20:1.  $^1\text{H}$  NMR (600 MHz,  $\text{CDCl}_3$ )  $\delta$  7.37-7.31 (m, 2H), 7.30-7.27 (m, 1H), 7.21-7.14 (m, 2H), 4.74-4.67 (m, 1H), 3.32 (d,  $J = 12.3$  Hz, 1H), 3.21-3.15 (m, 1H), 2.15 (dd,  $J = 13.8, 6.5$  Hz, 1H), 1.88 (d,  $J = 3.6$  Hz, 1H), 1.79 (dd,  $J = 13.8, 5.0$  Hz, 1H), 1.12 (s, 3H), 0.68 (s, 3H).  $^{13}\text{C}$  NMR (151 MHz,  $\text{CDCl}_3$ )  $\delta$  137.37, 128.78, 127.88, 126.97 (q,  $J = 279.9$  Hz), 126.89, 70.41 (q,  $J = 1.7$  Hz), 54.10 (q,  $J = 1.6$  Hz), 50.63 (q,  $J = 23.7$  Hz), 50.11, 40.58, 29.12, 25.18.  $^{19}\text{F}$  NMR (565 MHz,  $\text{CDCl}_3$ )  $\delta$  -62.69. HRMS (ESI)  $m/z$ :  $[M + \text{H}]^+$  Calcd for  $\text{C}_{14}\text{H}_{17}\text{F}_3\text{O} + \text{H}^+$ : 259.1304; Found 259.1304.

#### Experimental Procedure for the Transformation of **3a** to **4b**

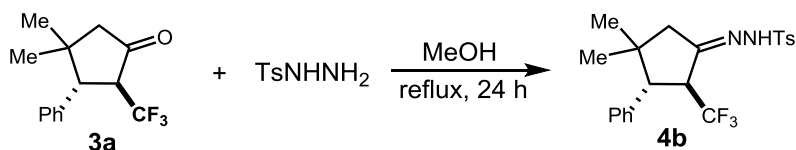

To a solution of **3a** (25.6 mg, 0.1 mmol) in 1 mL of dry MeOH was added  $\text{TsNHNH}_2$  (22.3 mg,

0.12 mmol) and HOAc (1.2 mg, 0.02 mmol) at room temperature. After being refluxed for 18 h, the reaction mixture was quenched with water, extracted with EtOAc, dried over anhydrous Na<sub>2</sub>SO<sub>4</sub>, and concentrated. Column chromatography on silica gel (petroleum ethers/EtOAc = 5:1) gave 34 mg (80% yield) of **4b** as a white solid, mp 158-160 °C, dr >20:1. <sup>1</sup>H NMR (600 MHz, CDCl<sub>3</sub>) δ 7.85 (d, *J* = 8.3 Hz, 2H), 7.46 (s, 1H), 7.34-7.27 (m, 5H), 7.13 (d, *J* = 7.2 Hz, 2H), 3.87-3.79 (m, 1H), 3.06 (d, *J* = 11.6 Hz, 1H), 2.48 (d, *J* = 16.5 Hz, 1H), 2.43 (s, 3H), 2.14 (d, *J* = 15.4 Hz, 1H), 1.06 (s, 3H), 0.69 (s, 3H). <sup>13</sup>C NMR (151 MHz, CDCl<sub>3</sub>) δ 156.40, 144.30, 136.06, 134.92, 129.48, 128.37, 128.09 (d, *J* = 28.2 Hz), 127.34, 125.64 (q, *J* = 279.7 Hz), 54.74, 50.67 (q, *J* = 27.2 Hz), 43.81, 40.75, 26.75, 22.90, 21.60. <sup>19</sup>F NMR (565 MHz, CDCl<sub>3</sub>) δ -67.63. HRMS (ESI) *m/z*: [*M* + H]<sup>+</sup> Calcd for C<sub>21</sub>H<sub>23</sub>F<sub>3</sub>N<sub>2</sub>O<sub>2</sub>S+H<sup>+</sup>: 425.1505; Found 425.1497.

### 3. Mechanistic Experiments

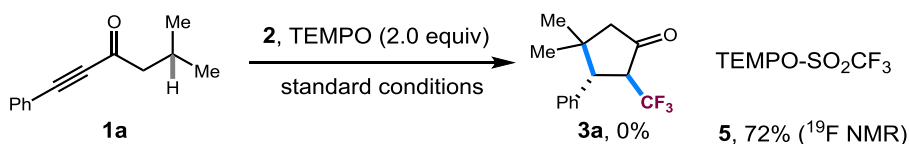

To a mixture of CF<sub>3</sub>SO<sub>2</sub>Na (62.4 mg, 0.4 mmol), 4CzIPN (3.2 mg, 2 mol%) and TEMPO (62.5 mg, 0.4 mmol) in 2 mL of DMF was added **1a** (37.2 mg, 0.2 mmol) under nitrogen atmosphere. After 20 h of irradiation at a distance of ~5 cm from 30 W blue LEDs (BESTLLON<sup>®</sup> lamps, 450 nm, 100% light intensity), the reaction mixture was quenched with water, extracted with EtOAc, washed with brine, dried over anhydrous Na<sub>2</sub>SO<sub>4</sub>, and concentrated to give **5** in 72% <sup>19</sup>F NMR yield using PhCF<sub>3</sub> as the internal standard.

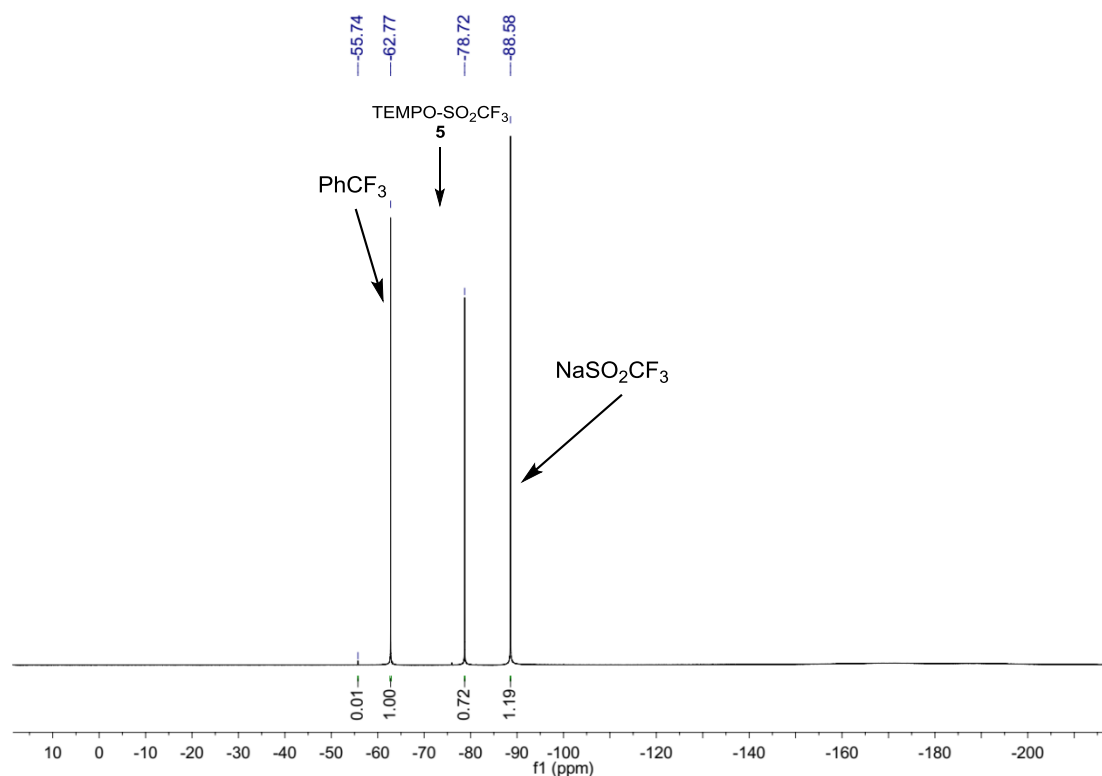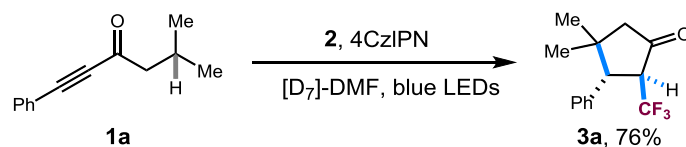

To a mixture of  $\text{CF}_3\text{SO}_2\text{Na}$  (62.4 mg, 0.4 mmol) and 4CzIPN (3.2 mg, 2 mol%) in 2 mL of  $[\text{D}_7]\text{-DMF}$  (98% D) was added **1a** (37.2 mg, 0.2 mmol) under nitrogen atmosphere. After 20 h of irradiation at a distance of ~5 cm from 30 W blue LEDs (BESTLLON<sup>®</sup> lamps, 450 nm, 100% light intensity), the reaction mixture was quenched with water, extracted with EtOAc, washed with brine, dried over anhydrous  $\text{Na}_2\text{SO}_4$ , and concentrated. Column chromatography on silica gel (petroleum ethers/EtOAc = 50:1) gave 39 mg (76% yield) of **3a** as a white solid.

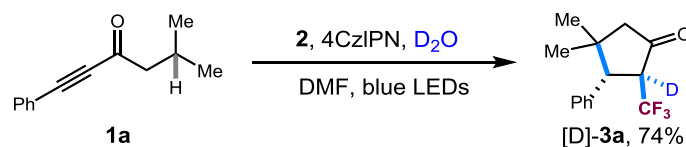

To a mixture of  $\text{CF}_3\text{SO}_2\text{Na}$  (62.4 mg, 0.4 mmol),  $\text{D}_2\text{O}$  (98% D, 12.0 mg, 0.6 mmol), and 4CzIPN (3.2 mg, 2 mol%) in 2 mL of DMF was added **1a** (37.2 mg, 0.2 mmol) under nitrogen atmosphere. After 20 h of irradiation at a distance of ~5 cm from 30 W blue LEDs (BESTLLON<sup>®</sup> lamps, 450 nm, 100% light intensity), the reaction mixture was quenched with water, extracted with EtOAc,

washed with brine, dried over anhydrous  $\text{Na}_2\text{SO}_4$ , and concentrated. Column chromatography on silica gel (petroleum ethers/EtOAc = 50:1) gave 38 mg (74% yield) of [D]-**3a** with 69% deuterium incorporation as a white solid, mp 89-90 °C.  $^1\text{H}$  NMR (600 MHz,  $\text{CDCl}_3$ )  $\delta$  7.41-7.35 (m, 2H), 7.33-7.30 (m, 1H), 7.20 (d,  $J = 7.8$  Hz, 2H), 3.49-3.43 (m, 0.31H), 3.42-3.36 (m, 1H), 2.45 (s, 2H), 1.17 (s, 3H), 0.79 (s, 3H).  $^{13}\text{C}$  NMR (151 MHz,  $\text{CDCl}_3$ )  $\delta$  207.19, 135.71, 128.31, 127.52, 124.64 (q,  $J = 279.4$  Hz), 55.06, 54.22 (q,  $J = 26.4$  Hz), 53.71 (d,  $J = 14.1$  Hz), 38.16, 27.00, 22.85.  $^{19}\text{F}$  NMR (565 MHz,  $\text{CDCl}_3$ )  $\delta$  -66.23 (D), -66.32. MS (EI)  $m/z$ :  $[M]^+$  Calcd for  $\text{C}_{14}\text{H}_{14}\text{DF}_3\text{O}^+$ : 257.1; Found 257.1.

### Determination of the KIE Values

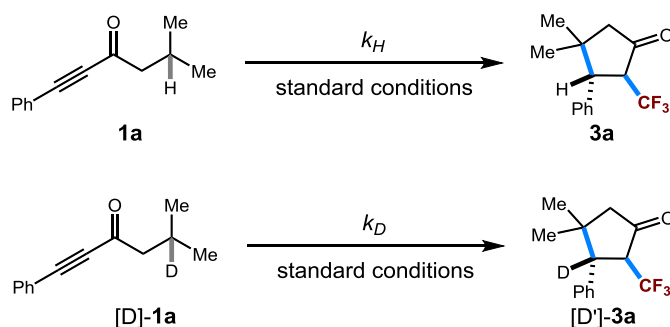

The method to calculate KIE is according to the reported method<sup>2</sup> through parallel reactions of **1a** and **[D]-1a** (75% D) using the general product with *n*-dodecane as the internal standard.

| time (h)     | 2      | 3      | 4      | 5      |
|--------------|--------|--------|--------|--------|
| yield of H   | 0.2355 | 0.3007 | 0.3697 | 0.406  |
| yield of H+D | 0.1322 | 0.1602 | 0.1937 | 0.2356 |

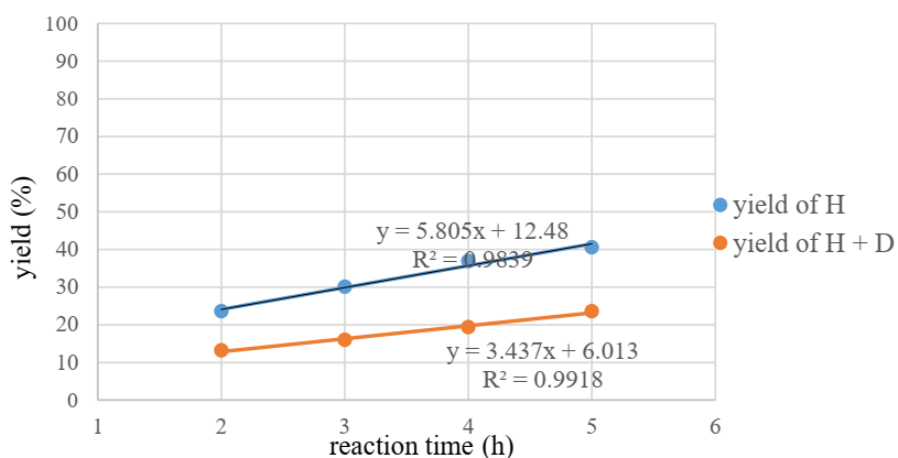

<sup>2</sup> (a) X.-H. Yang, R. Davison, S.-Z. Nie, F. A. Cruz, T. M. McGinnis and V. M. Dong, *J. Am. Chem. Soc.*, 2019, **141**, 3006; (b) C. Obradors, R. M. Martinez and R. A. Shenvi, *J. Am. Chem. Soc.*, 2016, **138**, 4962.

Adjusted initial rates:

$$k_H = 5.805$$

$$3.437 = k_H \times 25\% + k_D \times 75\%$$

$$k_D = 2.648$$

$$\text{KIE} = k_H/k_D = 2.19$$

**Table S1.** The dr value of **3a** at different time<sup>a</sup>

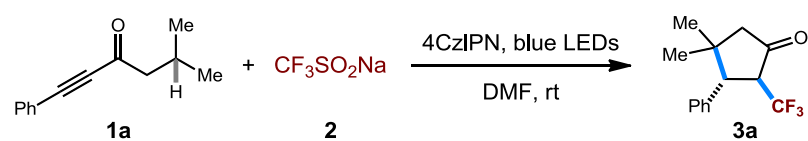

| Entry | Time (h) | Conversion of <b>1a</b> (%) | Dr of <b>3a</b> |
|-------|----------|-----------------------------|-----------------|
| 1     | 1        | 58                          | 7:1             |
| 2     | 2        | 90                          | 8:1             |
| 3     | 4        | 95                          | 14:1            |
| 4     | 8        | >99                         | 20:1            |
| 5     | 20       | >99                         | 25:1            |

<sup>a</sup> Reaction conditions: **1a** (0.2 mmol), **2** (0.4 mmol), 4CzIPN (2 mol%), DMF (2 mL), 30 W blue LEDs, 25 °C. <sup>b</sup> Determined by <sup>19</sup>F NMR.



## 4. NMR Spectra

LSY-KT2-2-001-A

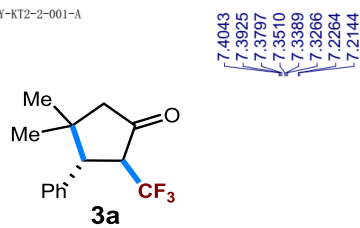

<sup>1</sup>H NMR (600 MHz, CDCl<sub>3</sub>)

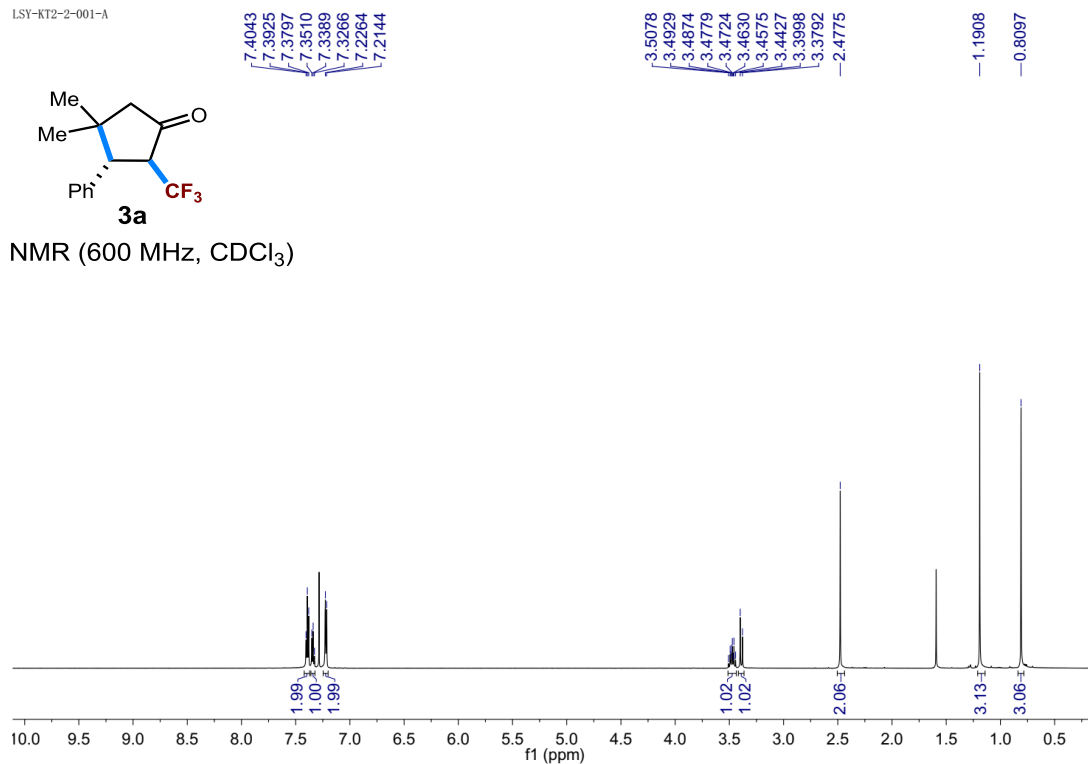

LSY-KT2-2-001-A

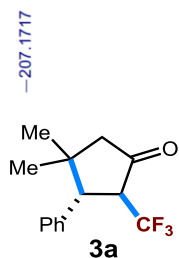

<sup>13</sup>C NMR (151 MHz, CDCl<sub>3</sub>)

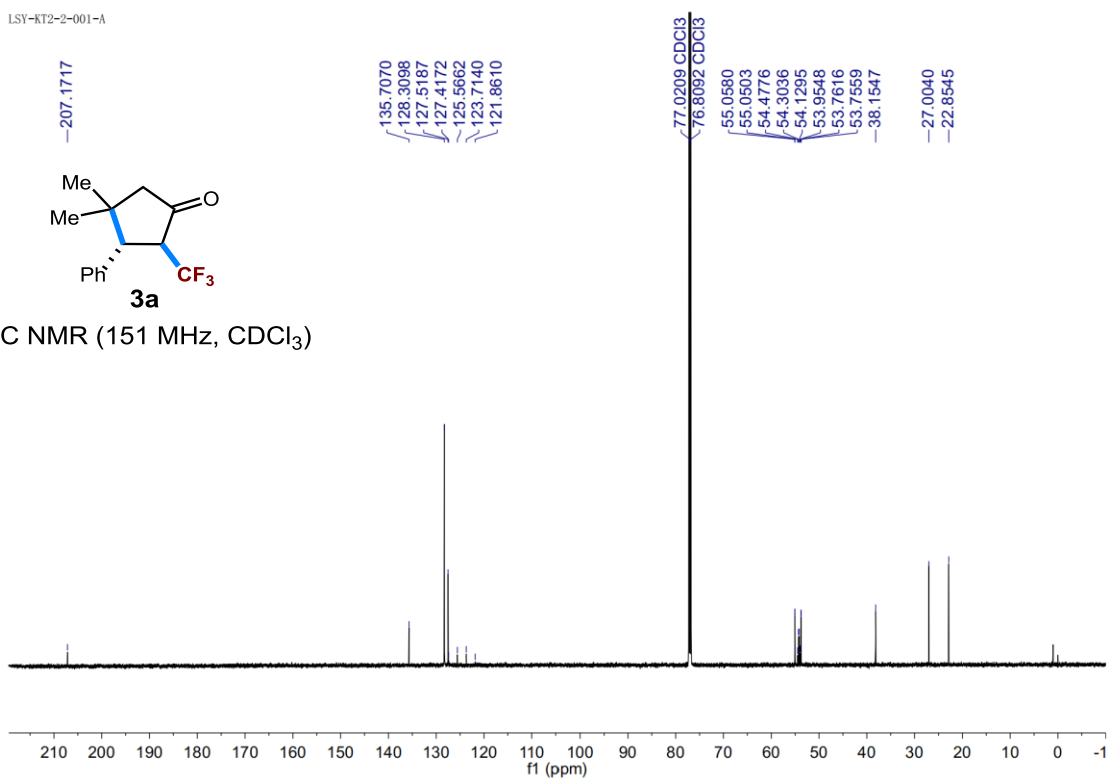

LSY-KT2-2-001-A

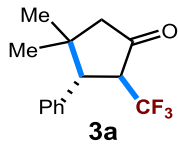

$^{19}\text{F}$  NMR (565 MHz,  $\text{CDCl}_3$ )

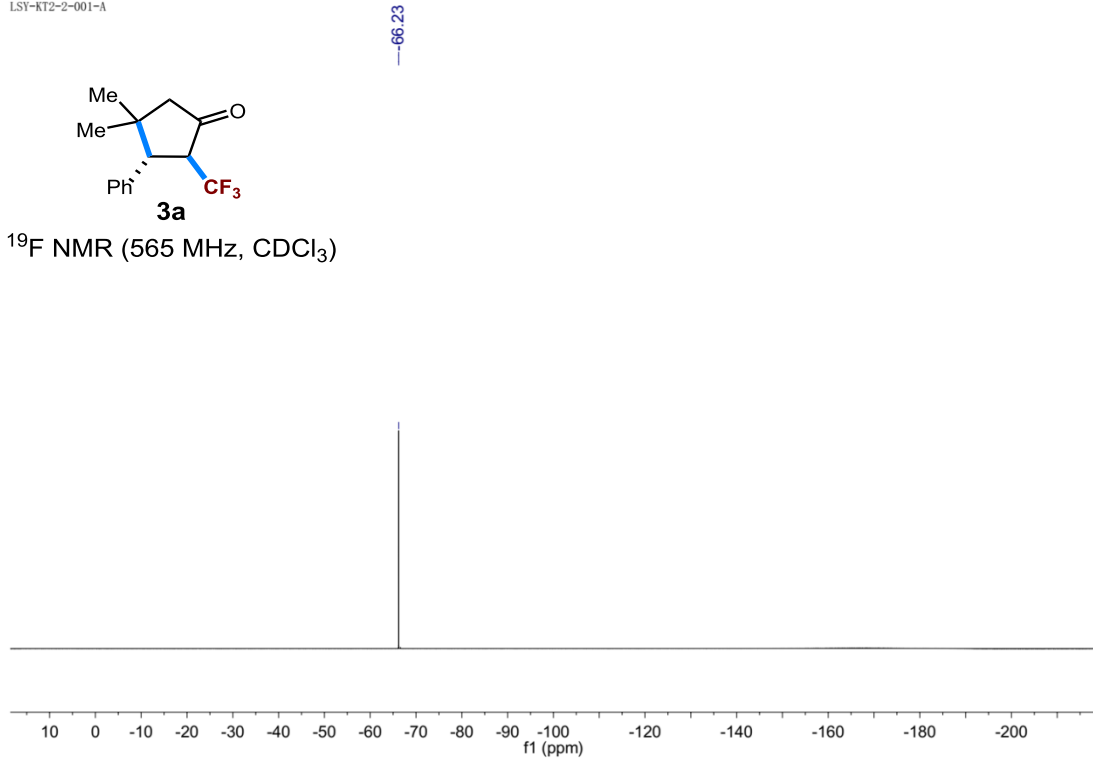

YSL-KT2-304

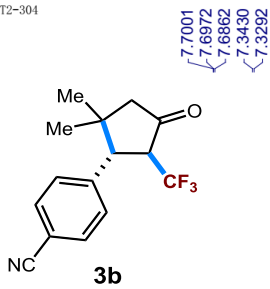

$^1\text{H}$  NMR (600 MHz,  $\text{CDCl}_3$ )

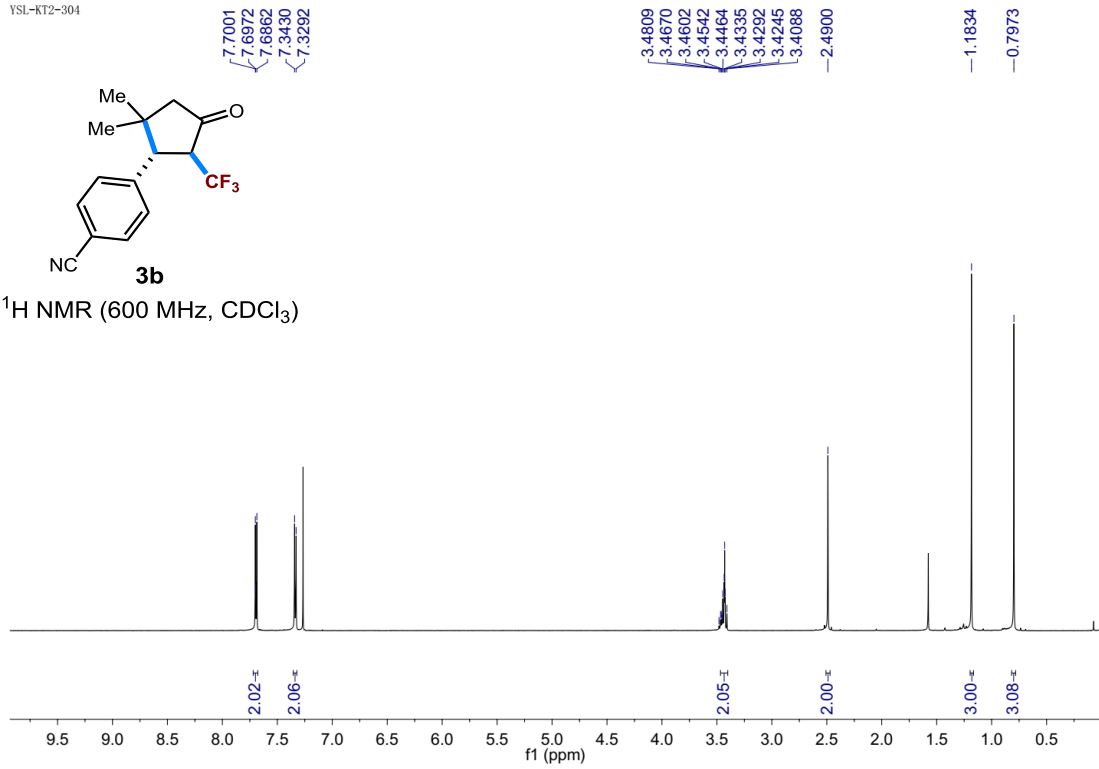

YSL-KT2-304

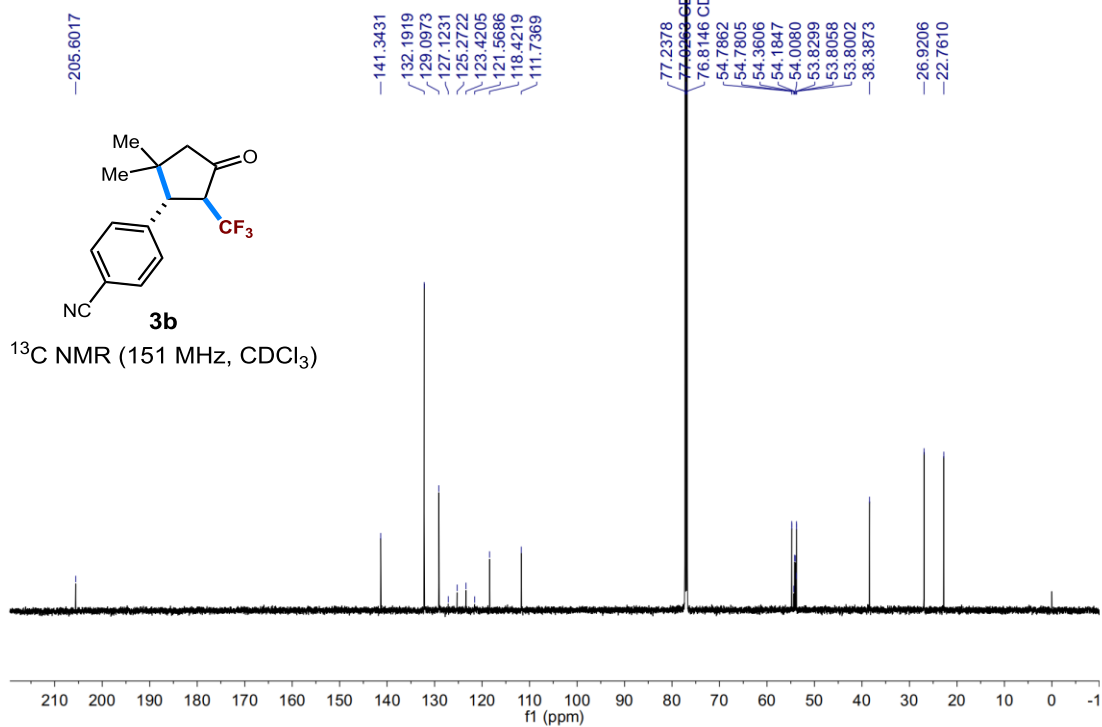

YSL-KT2-304

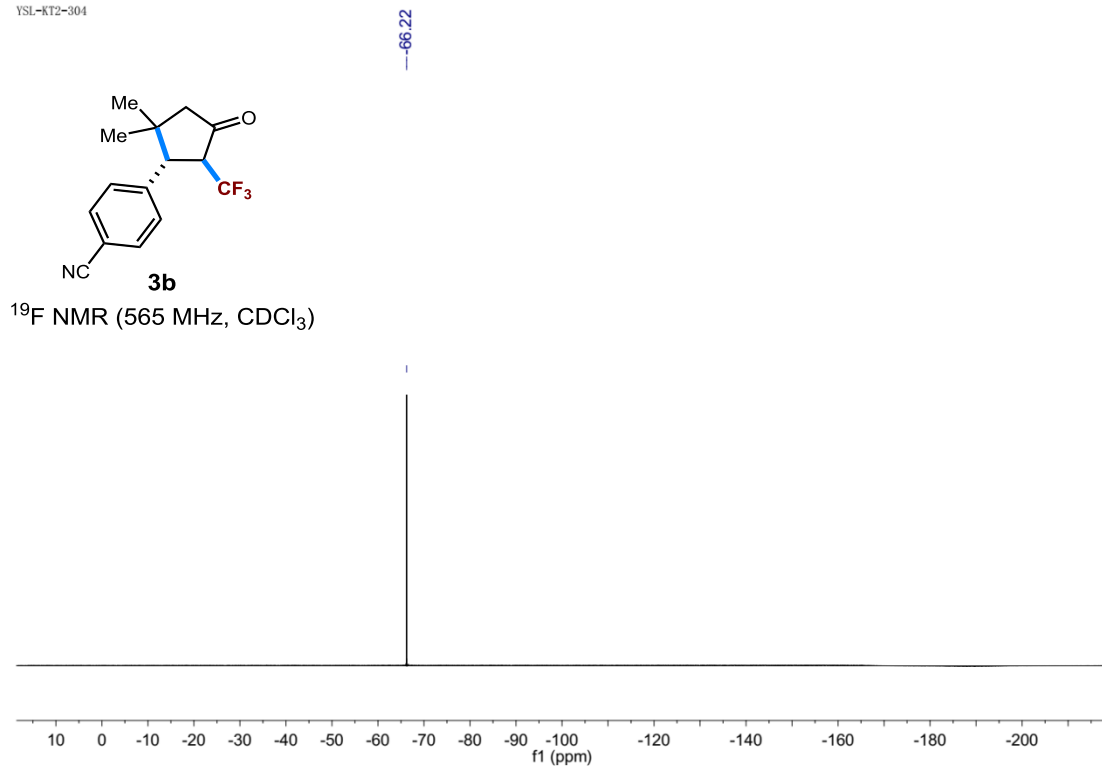

YSL-KT2-306

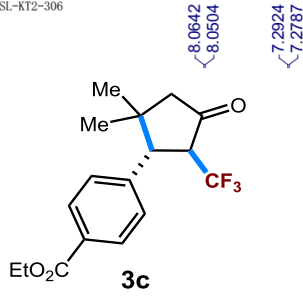

<sup>1</sup>H NMR (600 MHz, CDCl<sub>3</sub>)

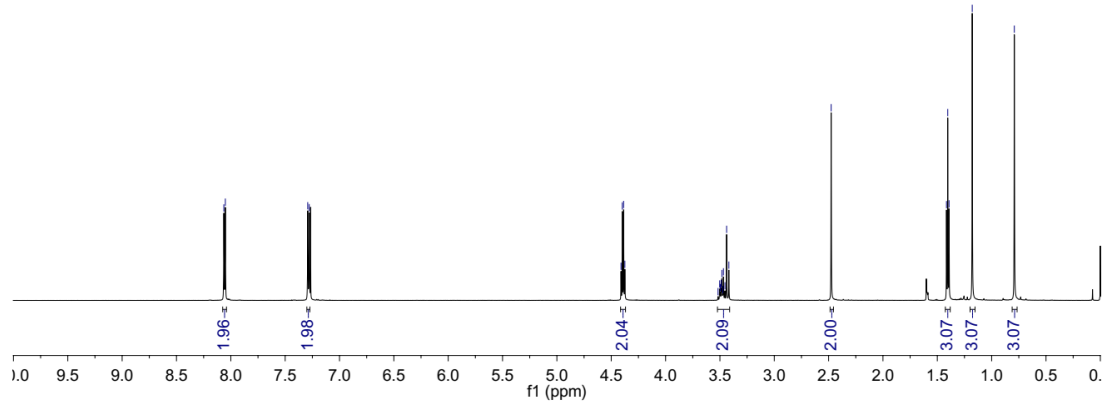

YSL-KT2-306

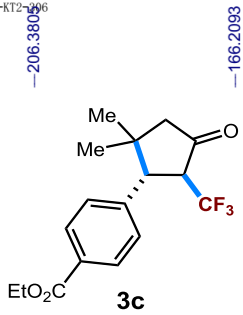

<sup>13</sup>C NMR (151 MHz, CDCl<sub>3</sub>)

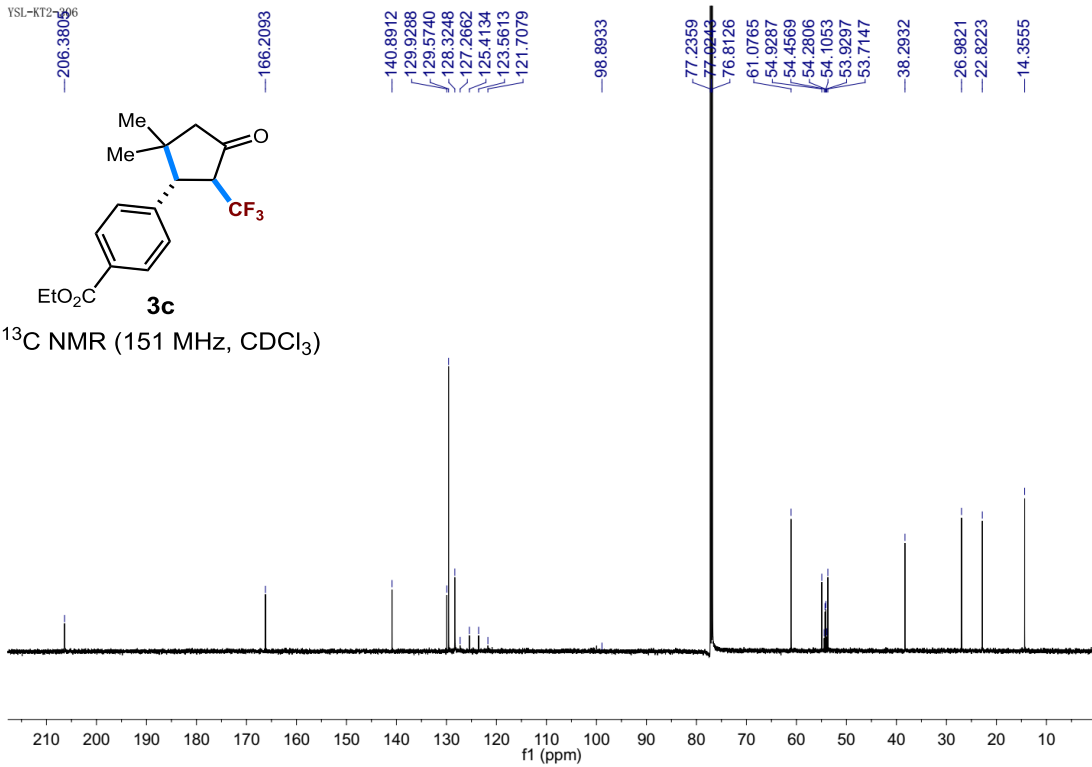

YSL-KT2-306

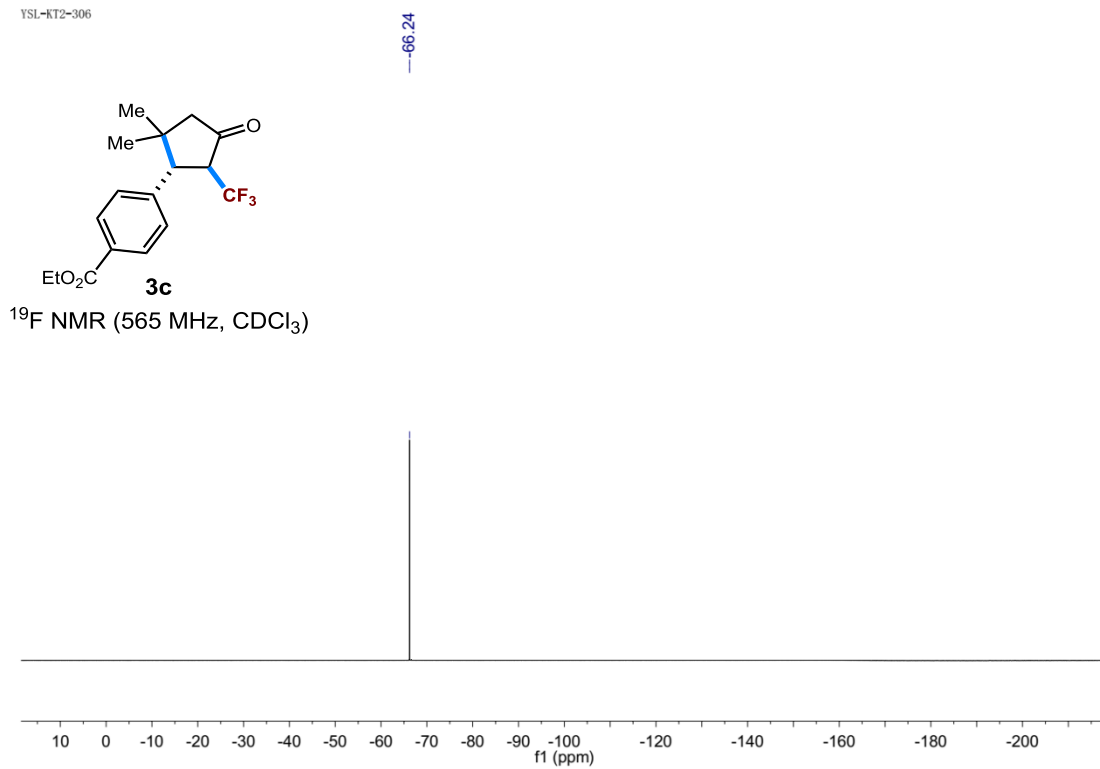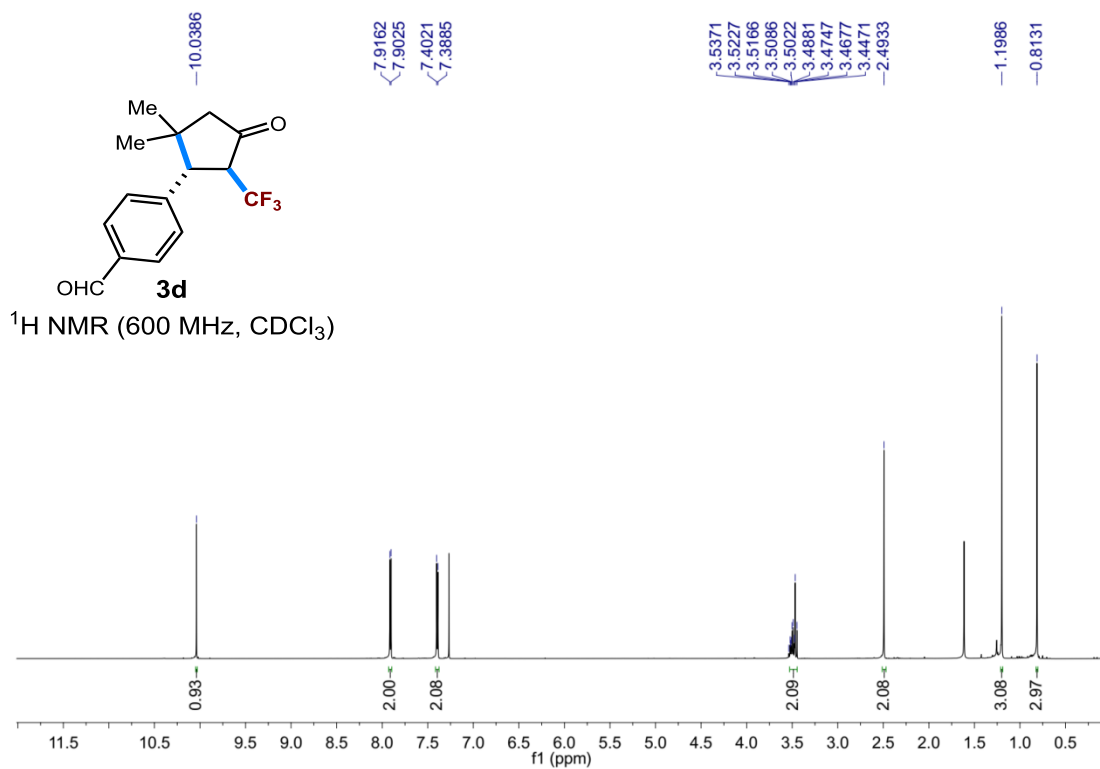

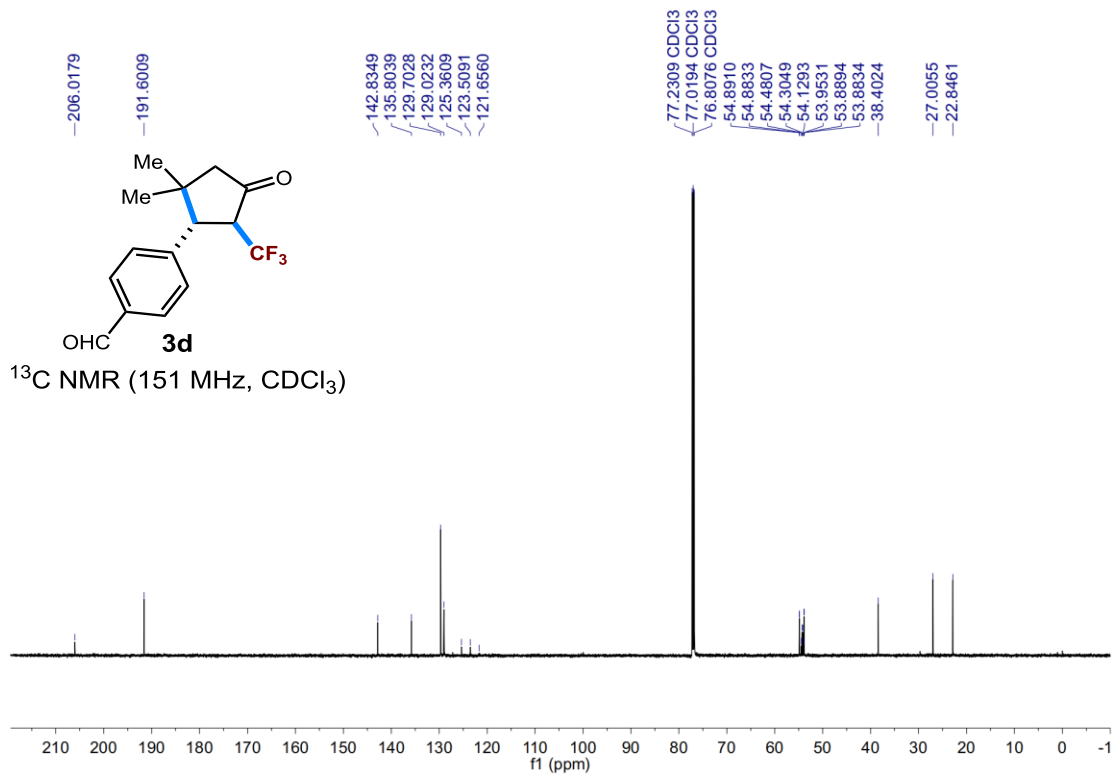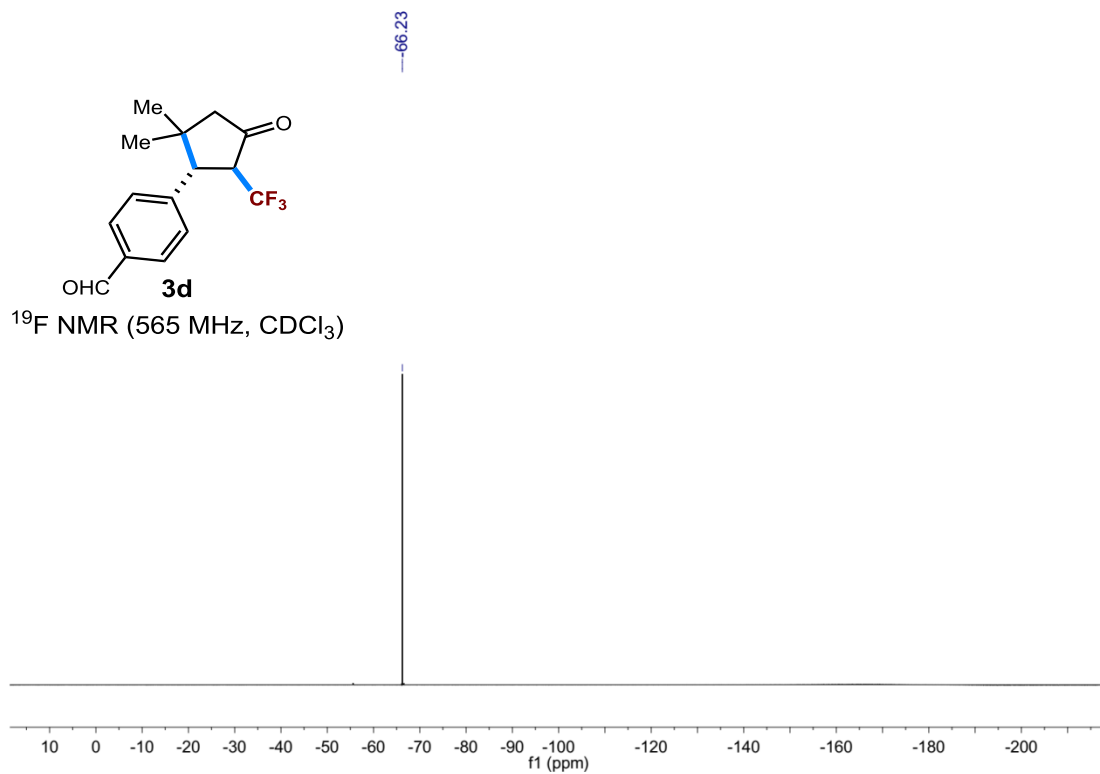

YSL KT2-303

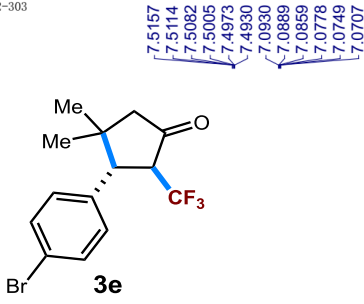

<sup>1</sup>H NMR (600 MHz, CDCl<sub>3</sub>)

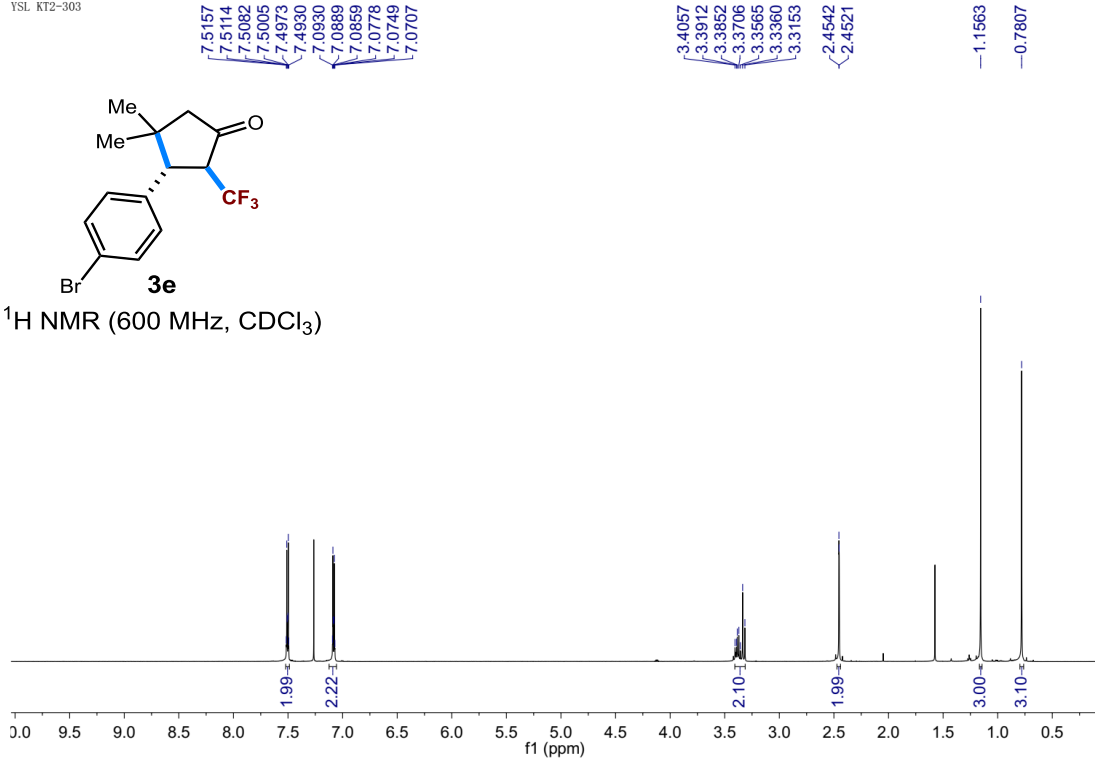

YSL-KT2-303

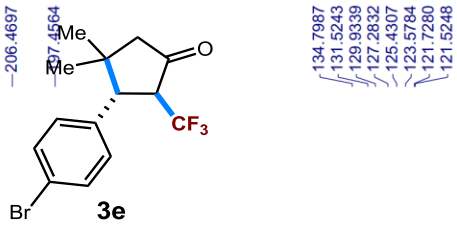

<sup>13</sup>C NMR (151 MHz, CDCl<sub>3</sub>)

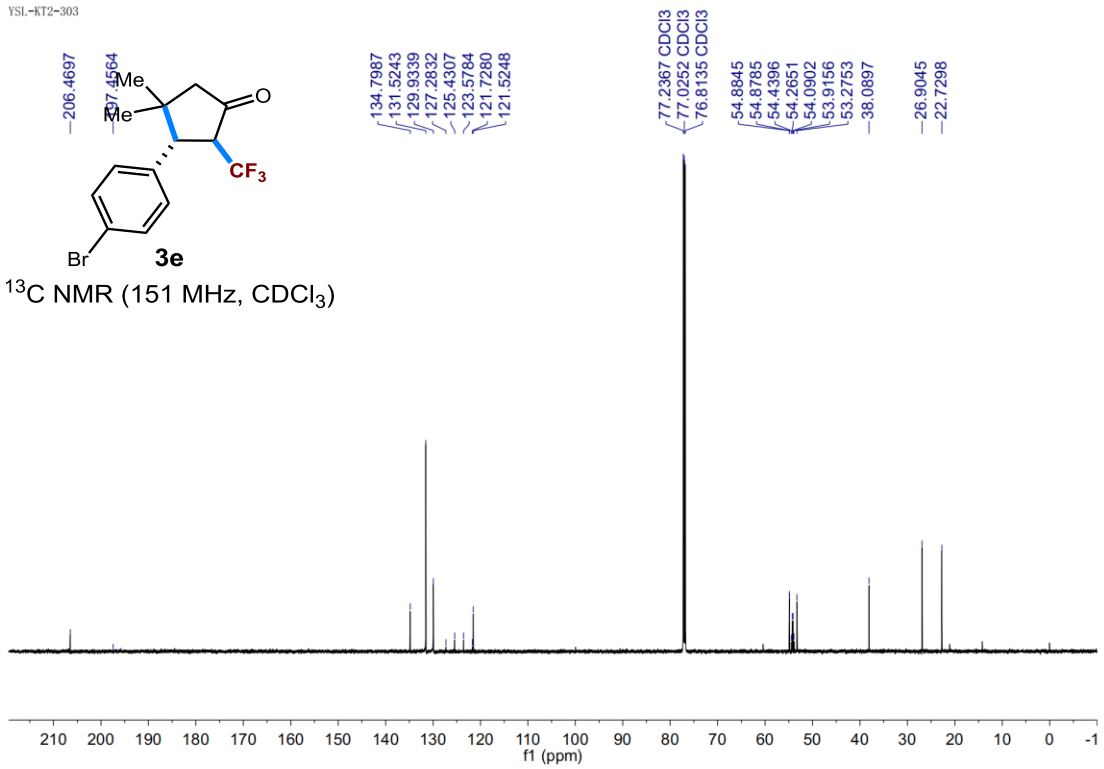

YSL KT2-303

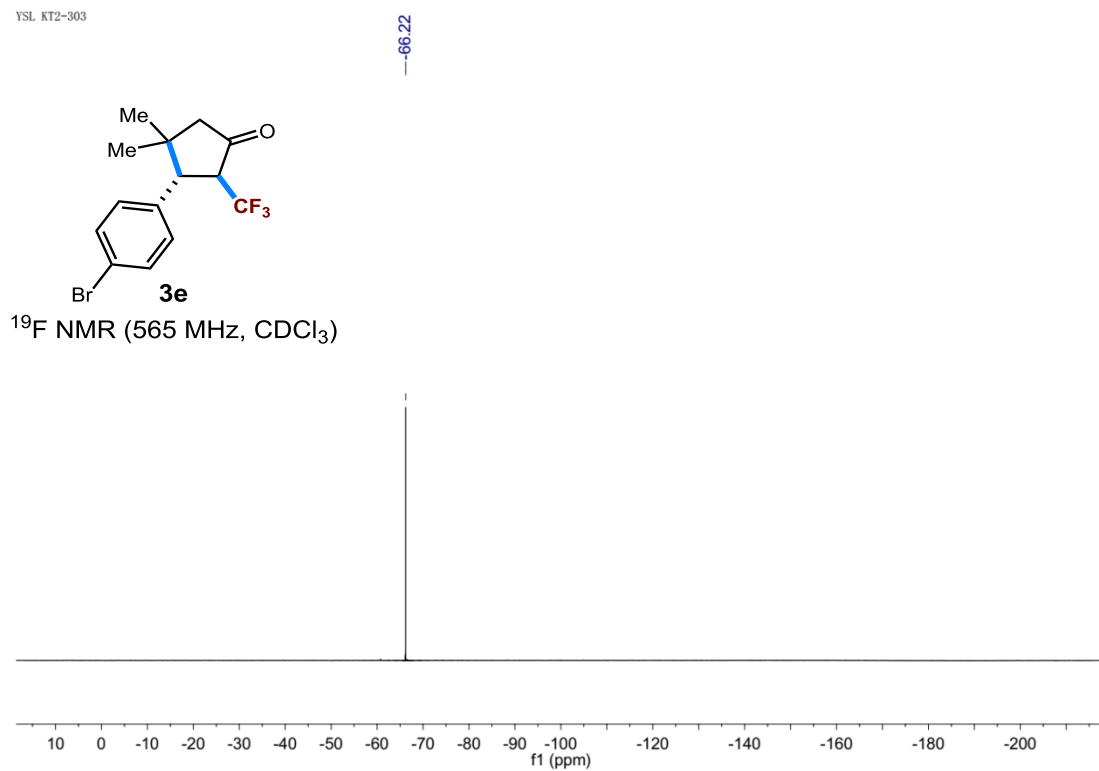

YSL KT2-302

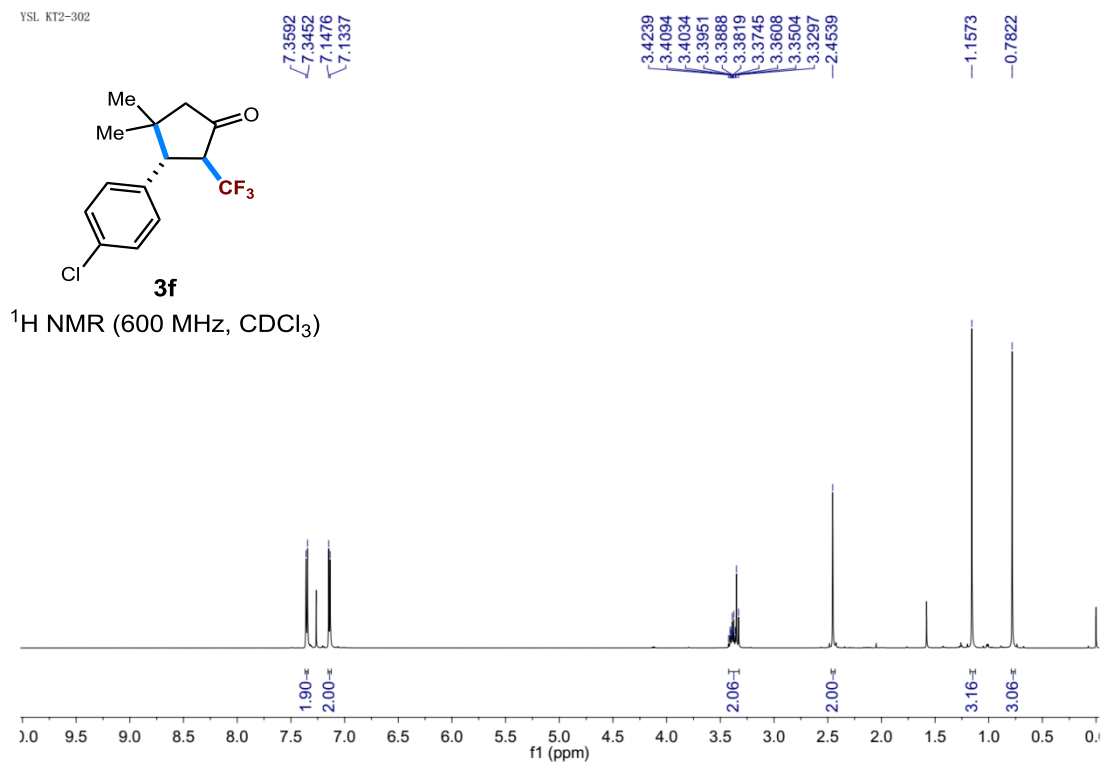



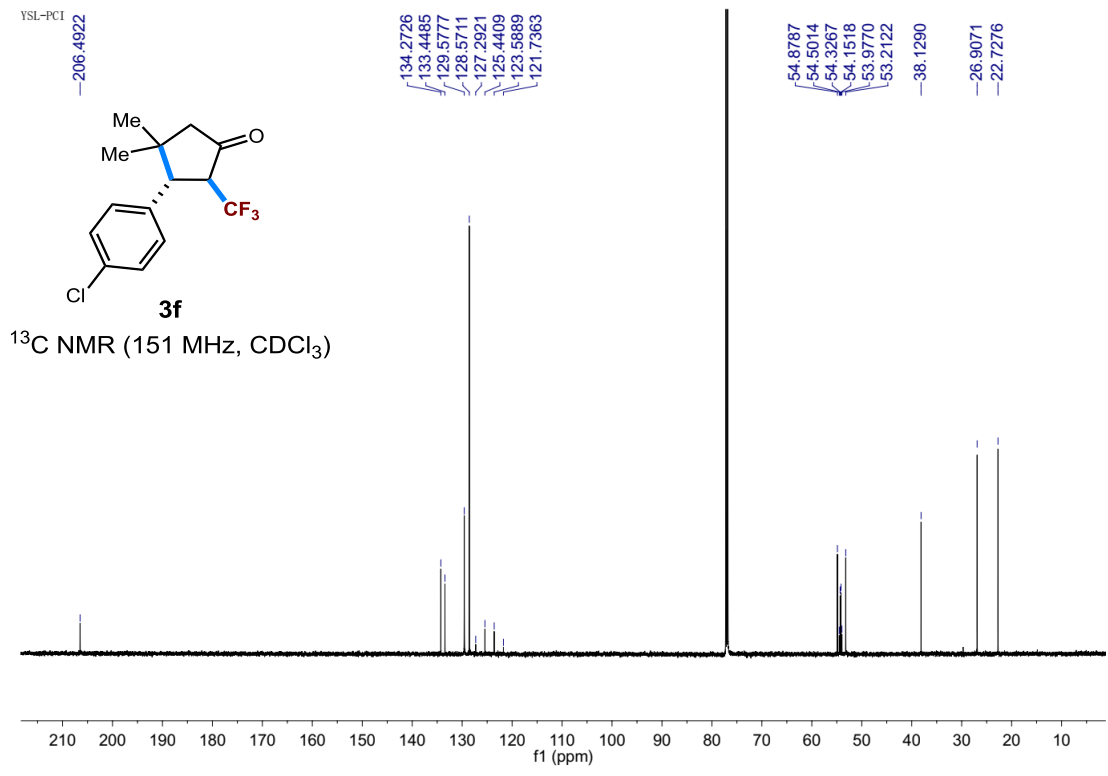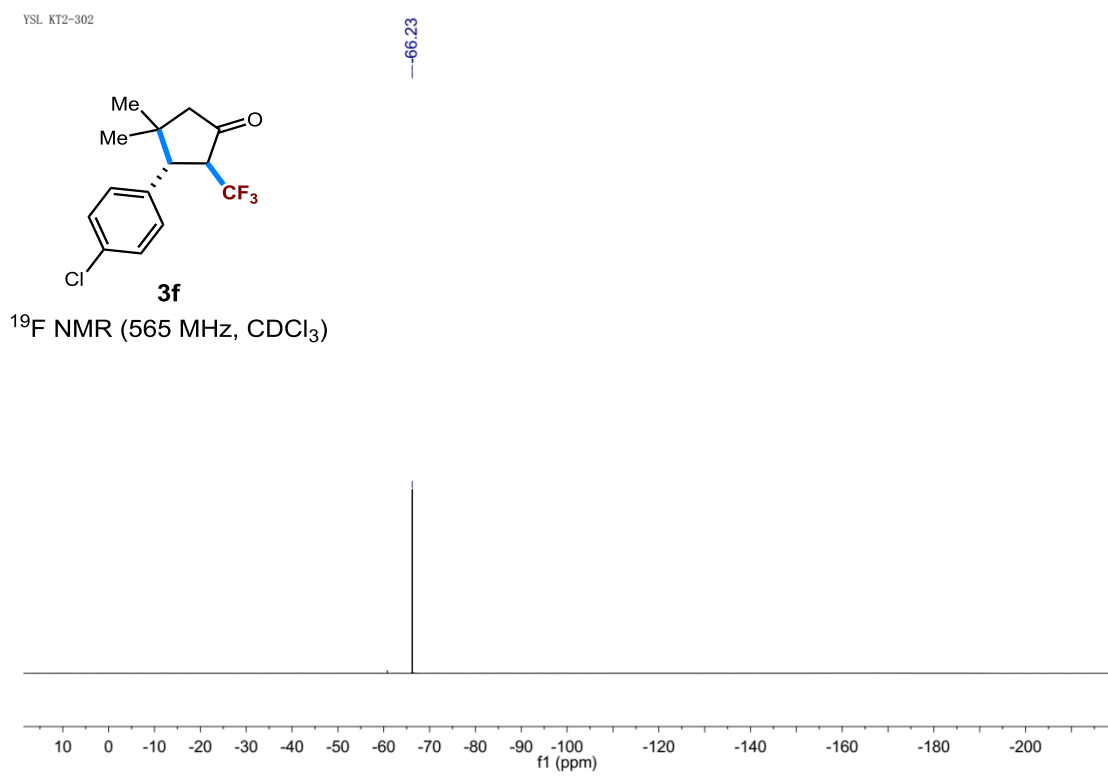

YSL KT2-301

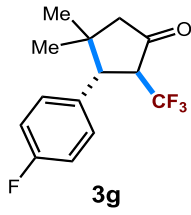

$^1\text{H NMR}$  (600 MHz,  $\text{CDCl}_3$ )

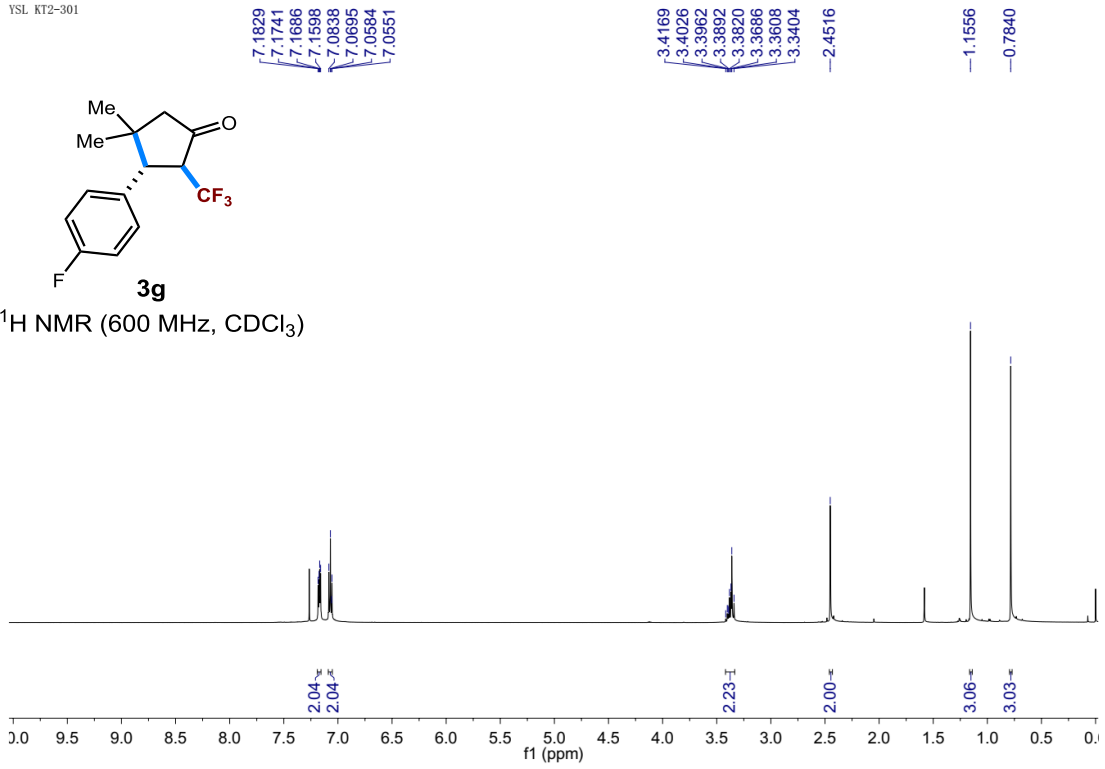

YSL-KT2-301

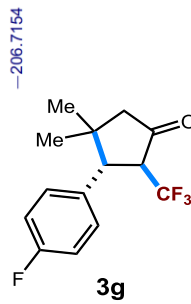

$^{13}\text{C NMR}$  (151 MHz,  $\text{CDCl}_3$ )

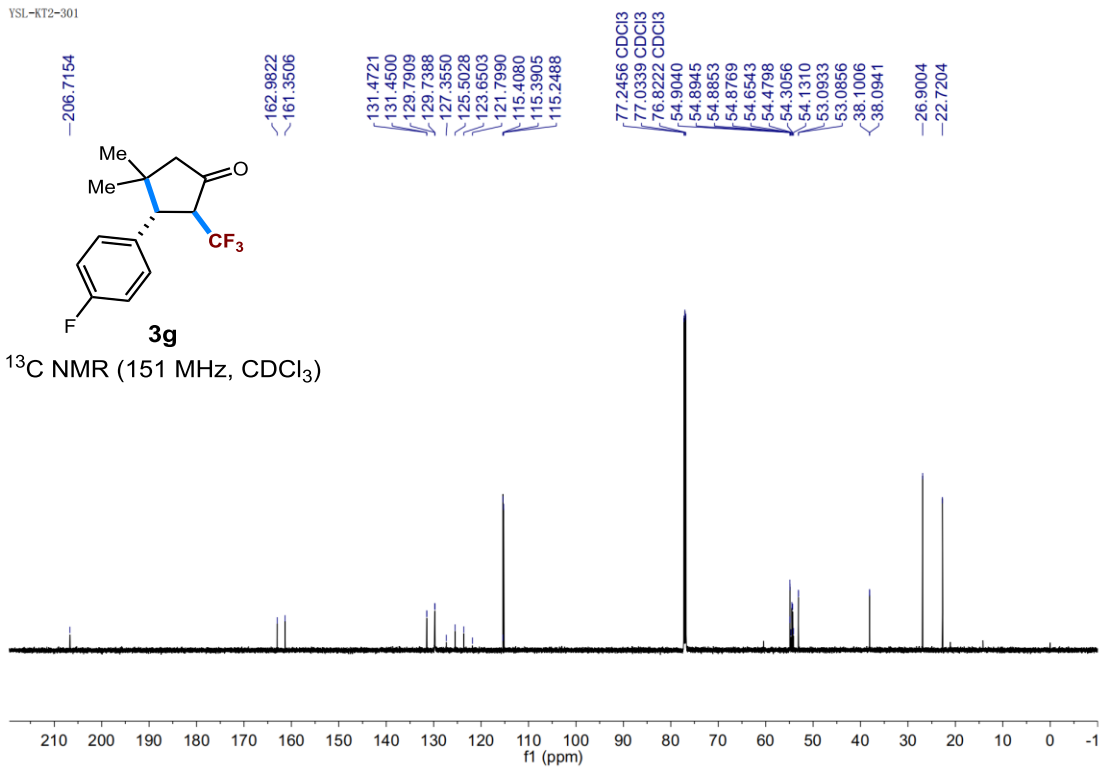

YSL\_KT2-301

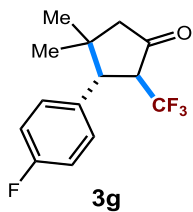

$^{19}\text{F}$  NMR (565 MHz,  $\text{CDCl}_3$ )

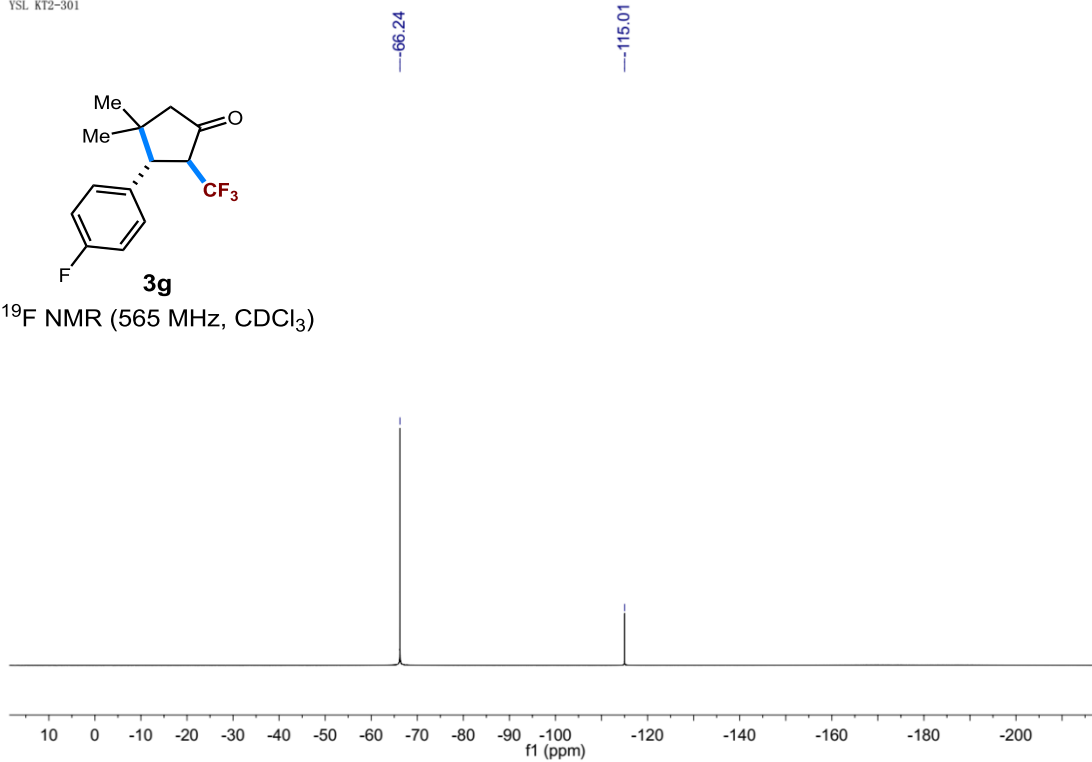

YSL-KT2-305

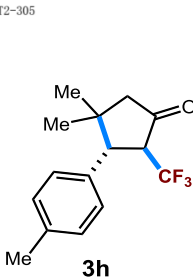

$^1\text{H}$  NMR (600 MHz,  $\text{CDCl}_3$ )

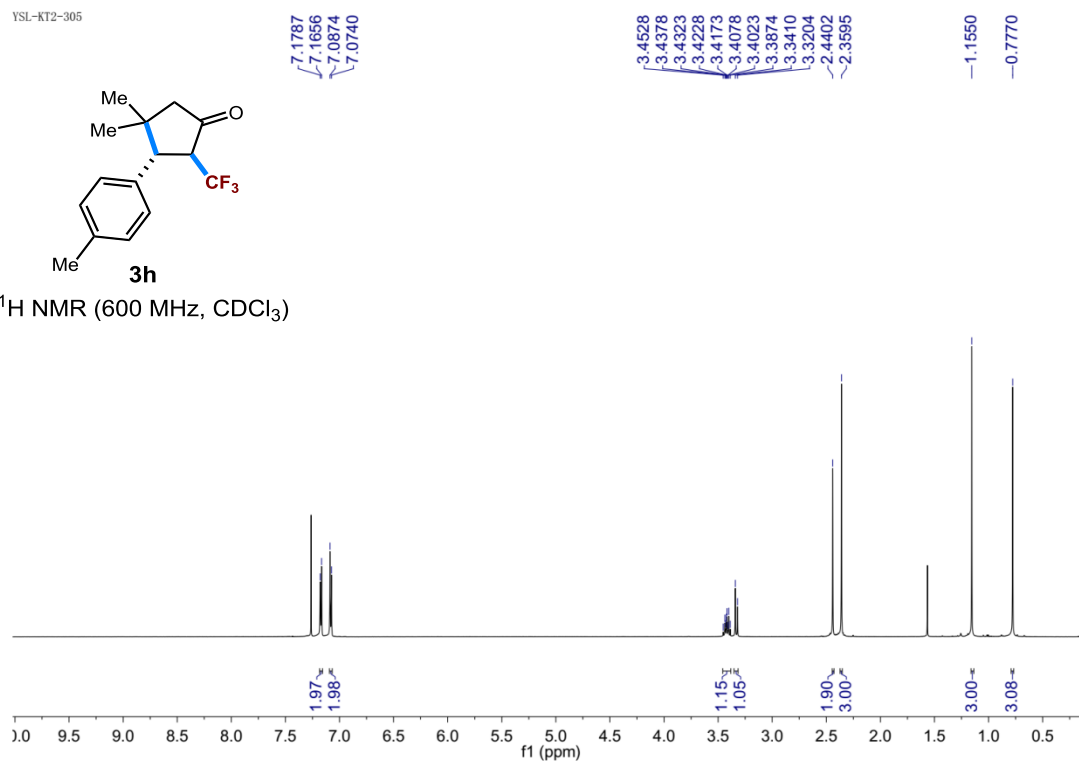

YSL-KT2-305

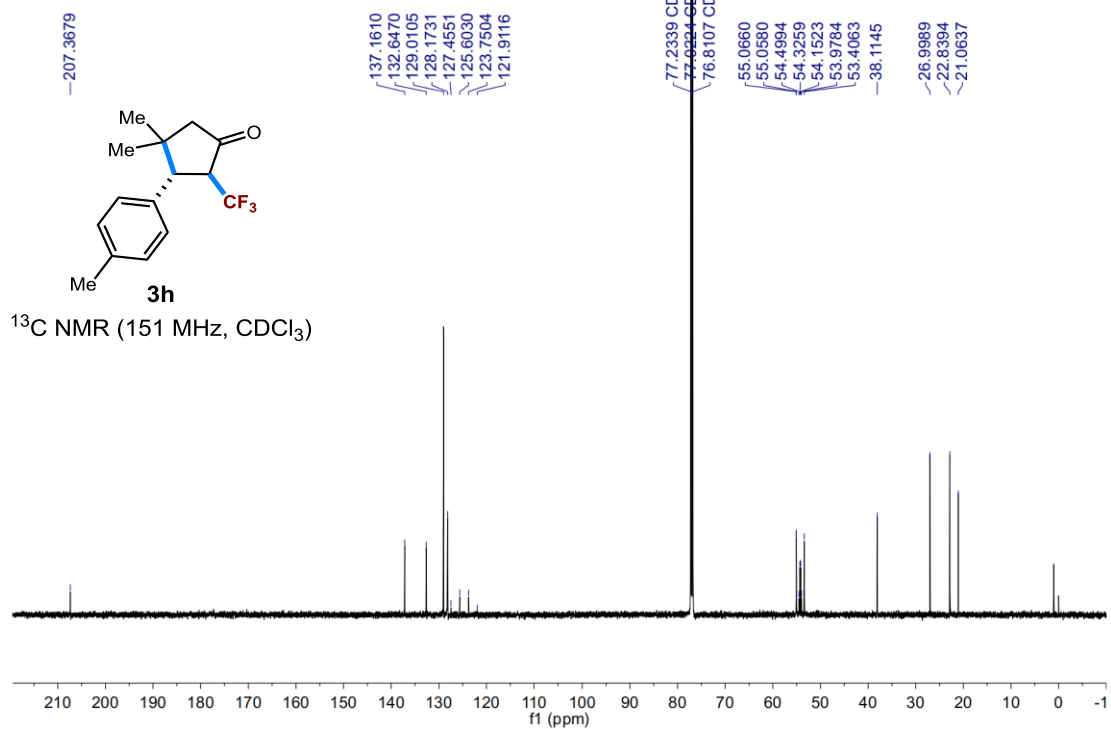

YSL-KT2-305

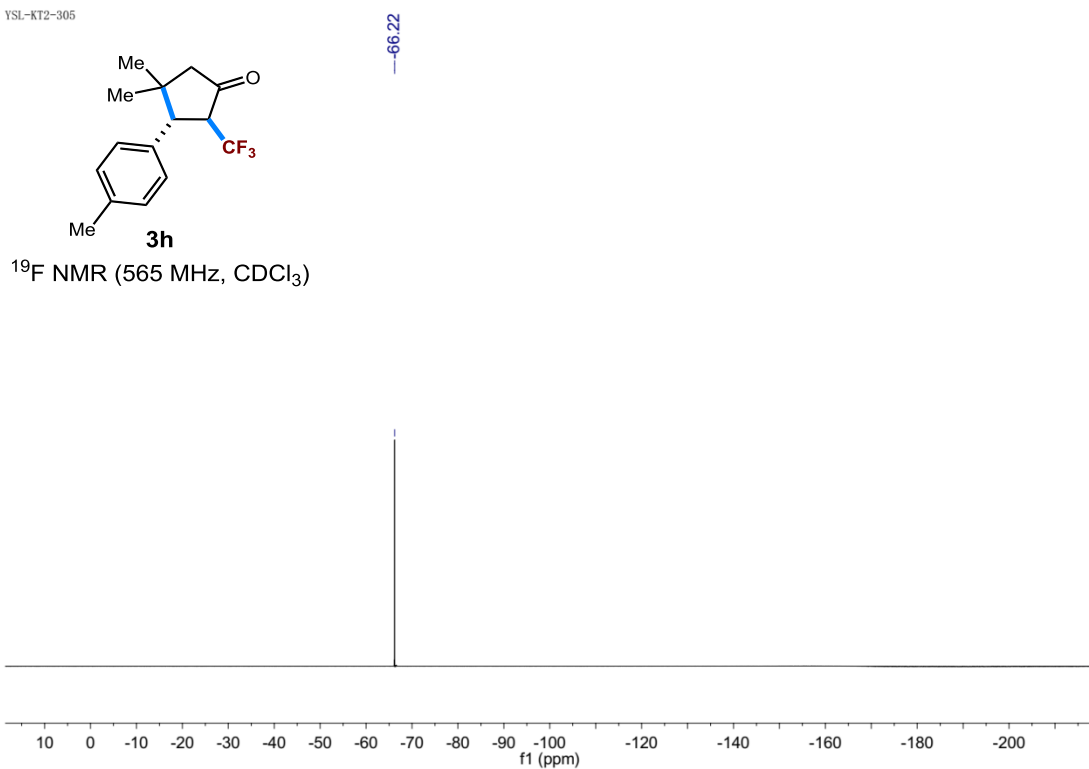

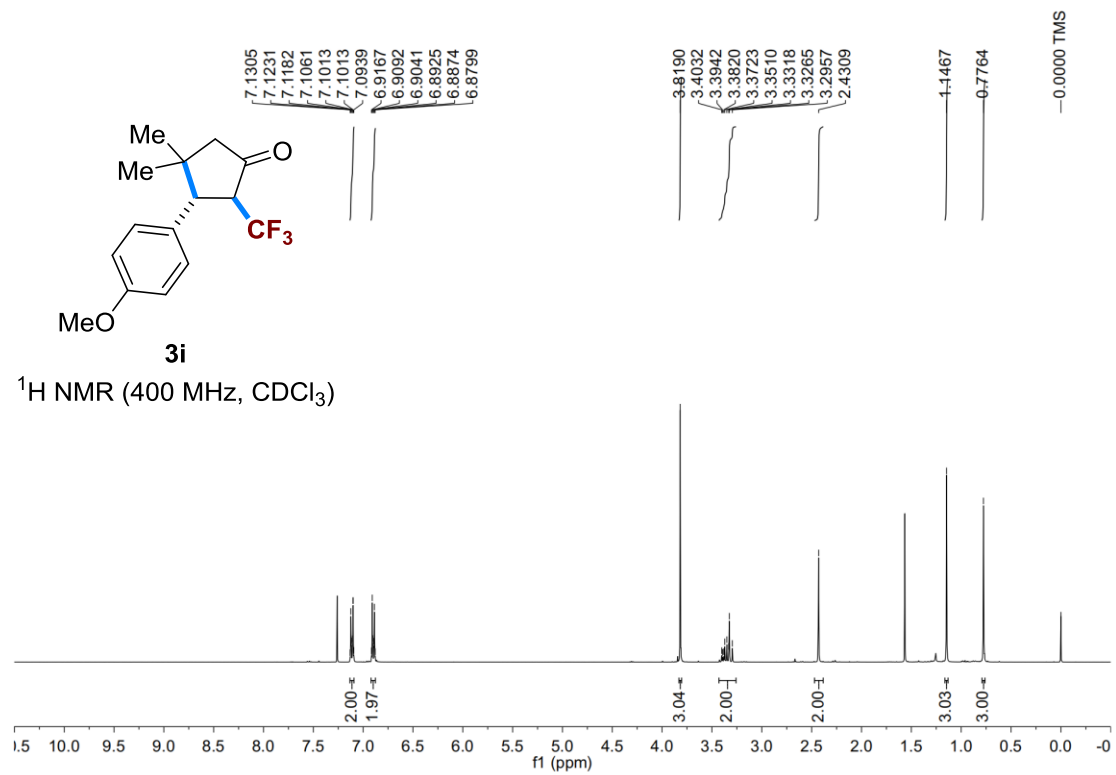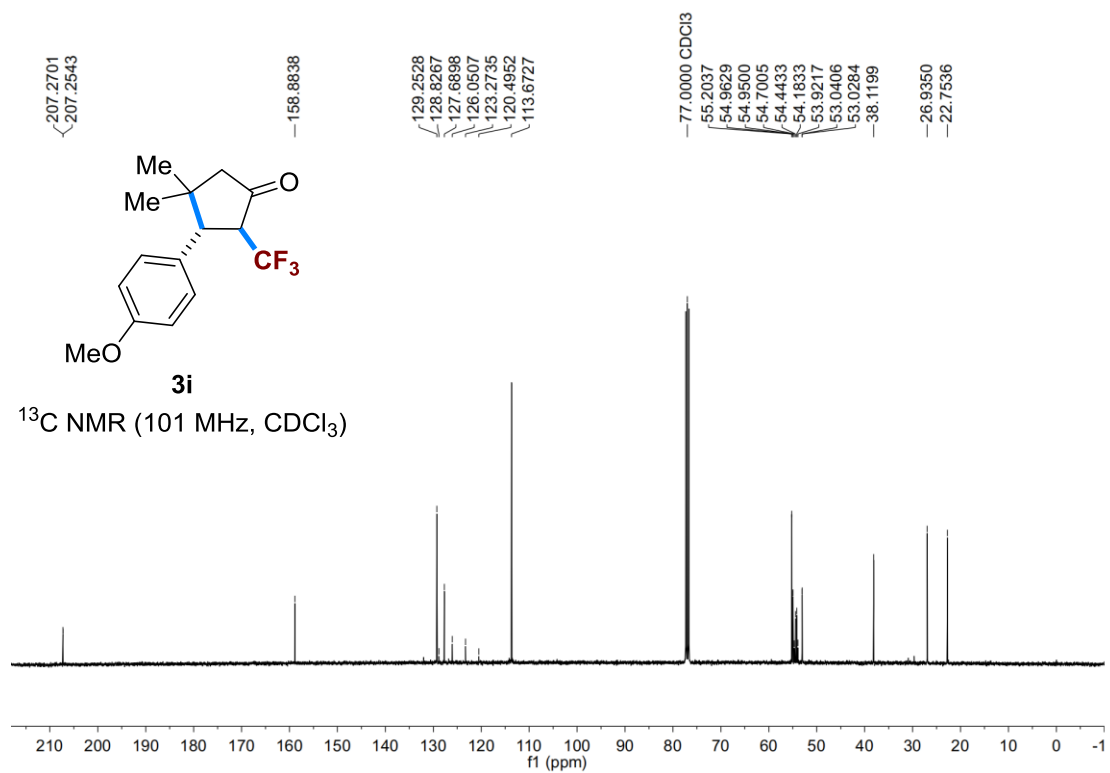

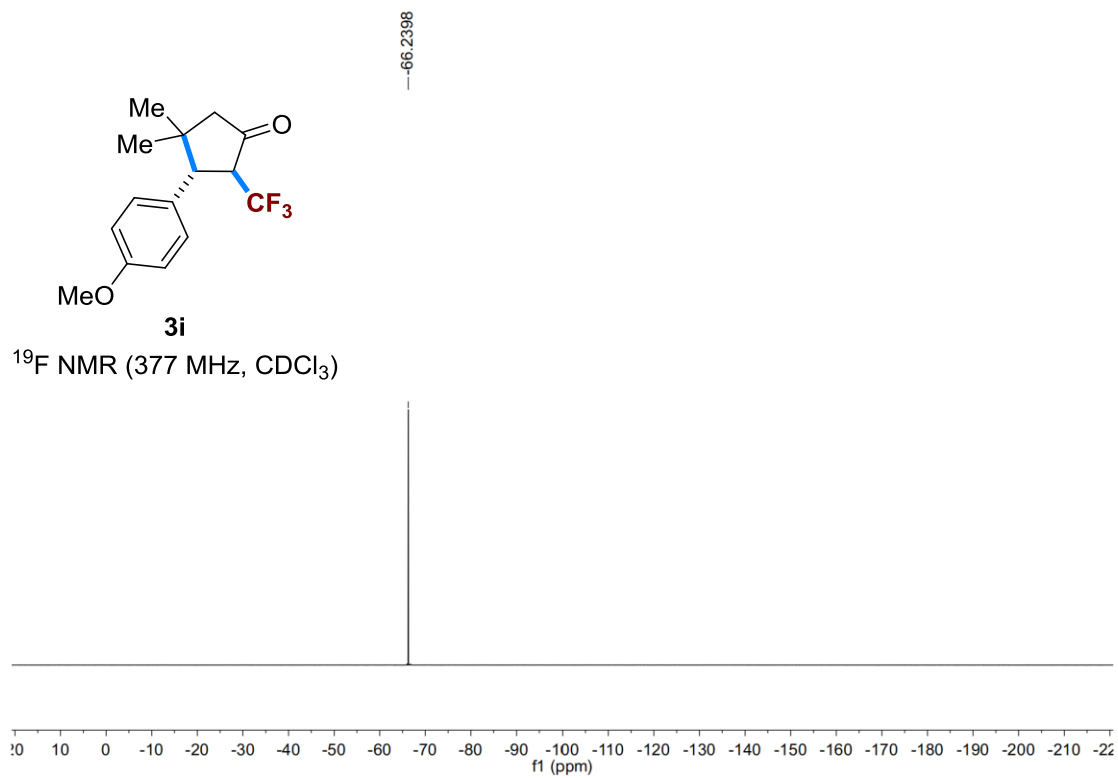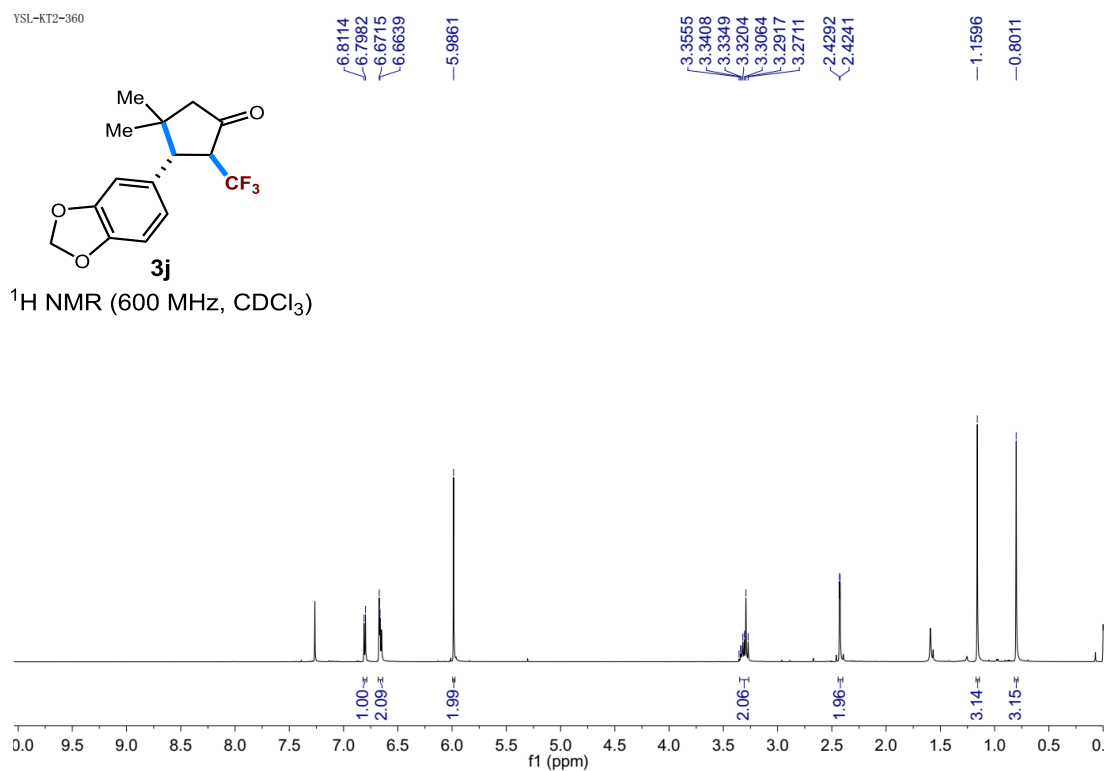

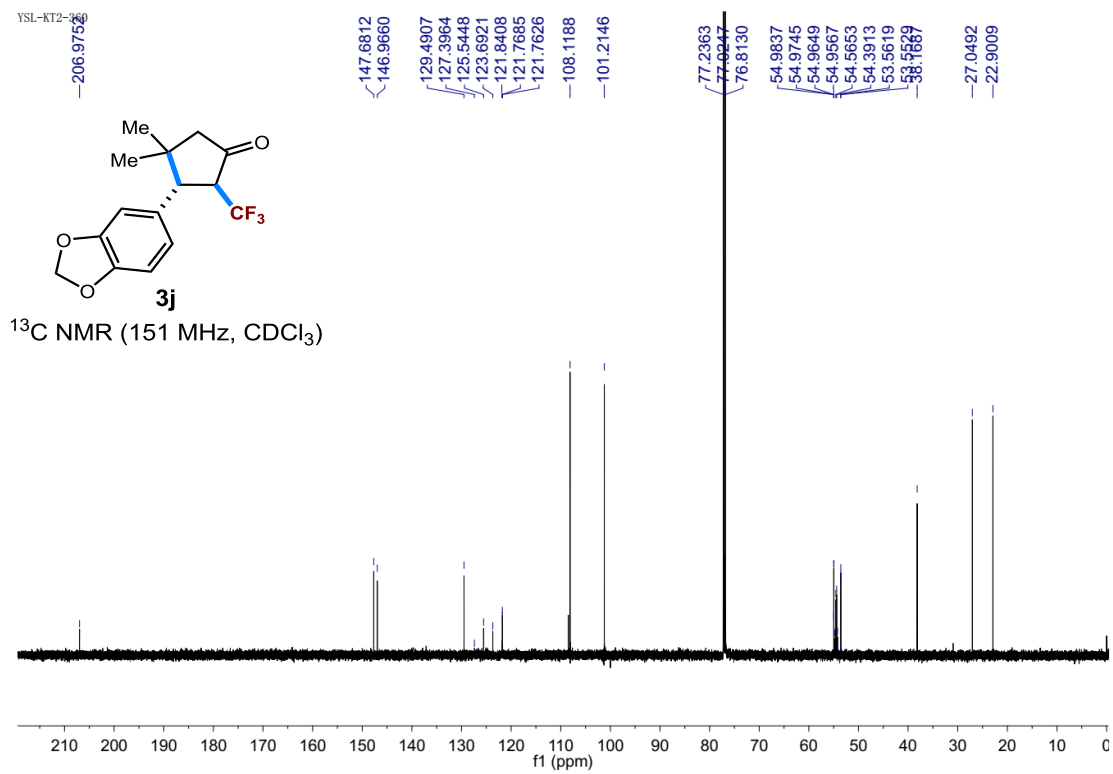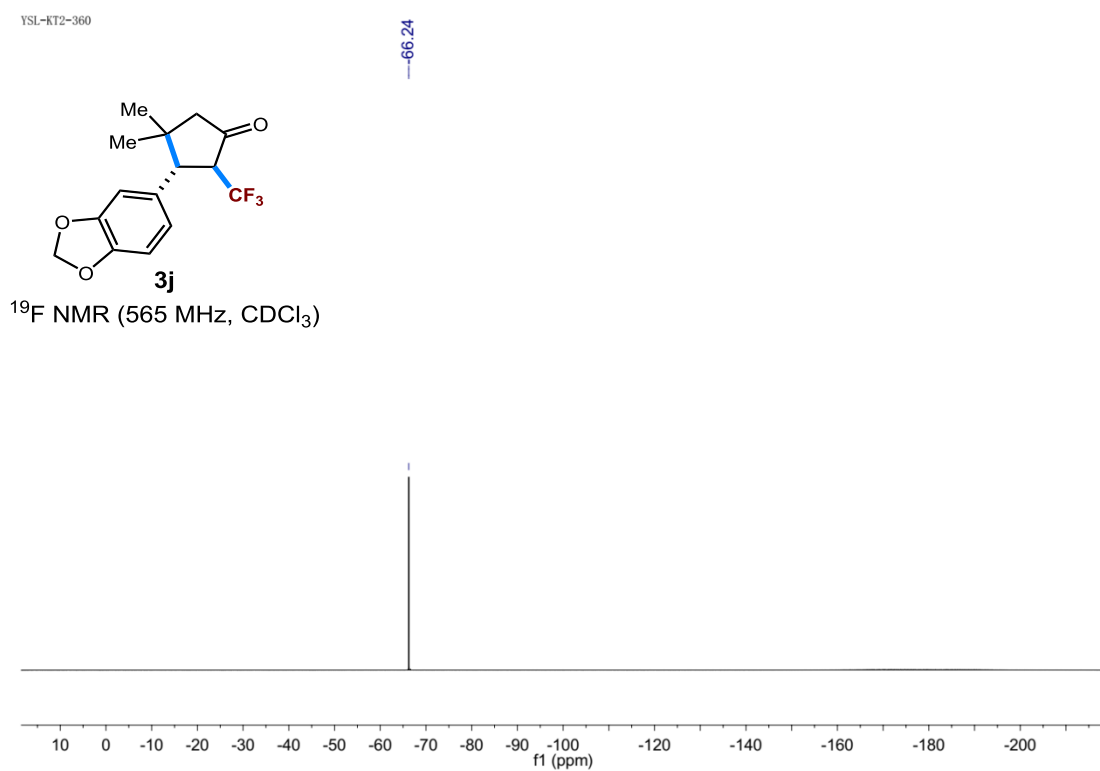

YSL-KT2-311

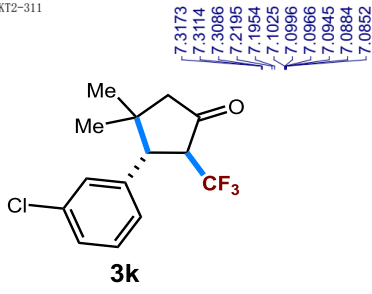

<sup>1</sup>H NMR (600 MHz, CDCl<sub>3</sub>)

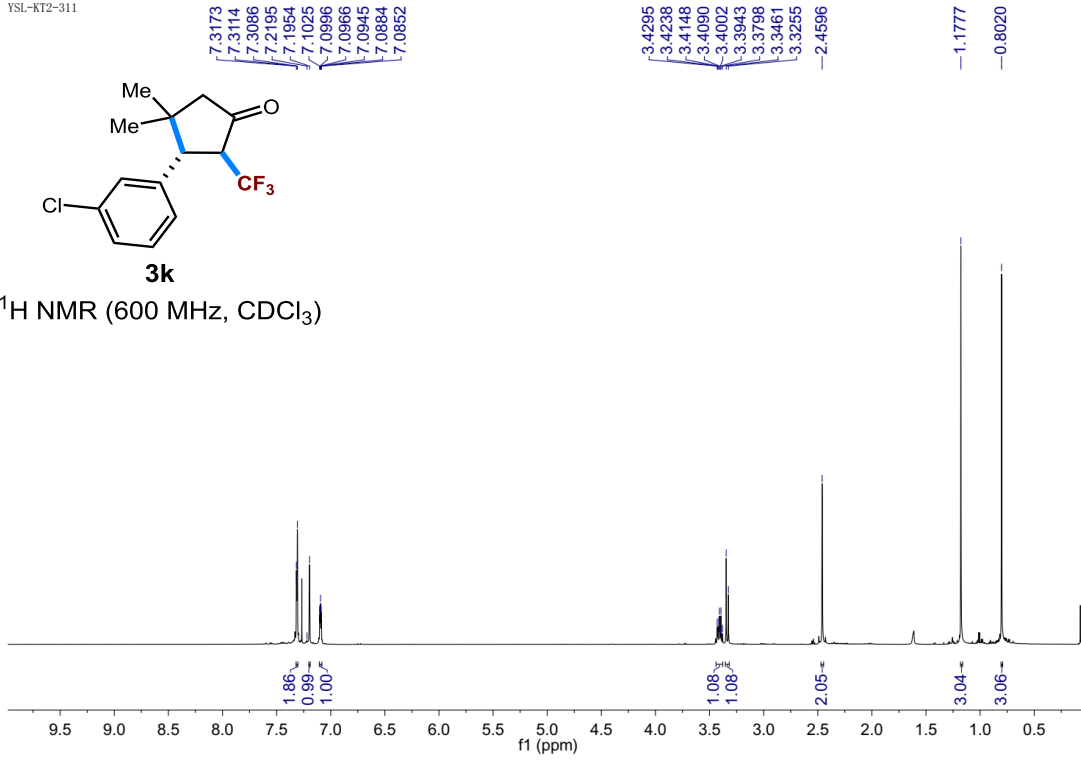

YSL-JCL

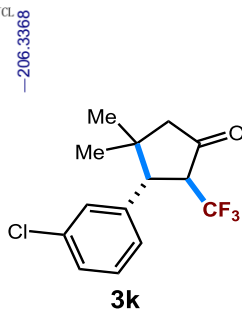

<sup>13</sup>C NMR (151 MHz, CDCl<sub>3</sub>)

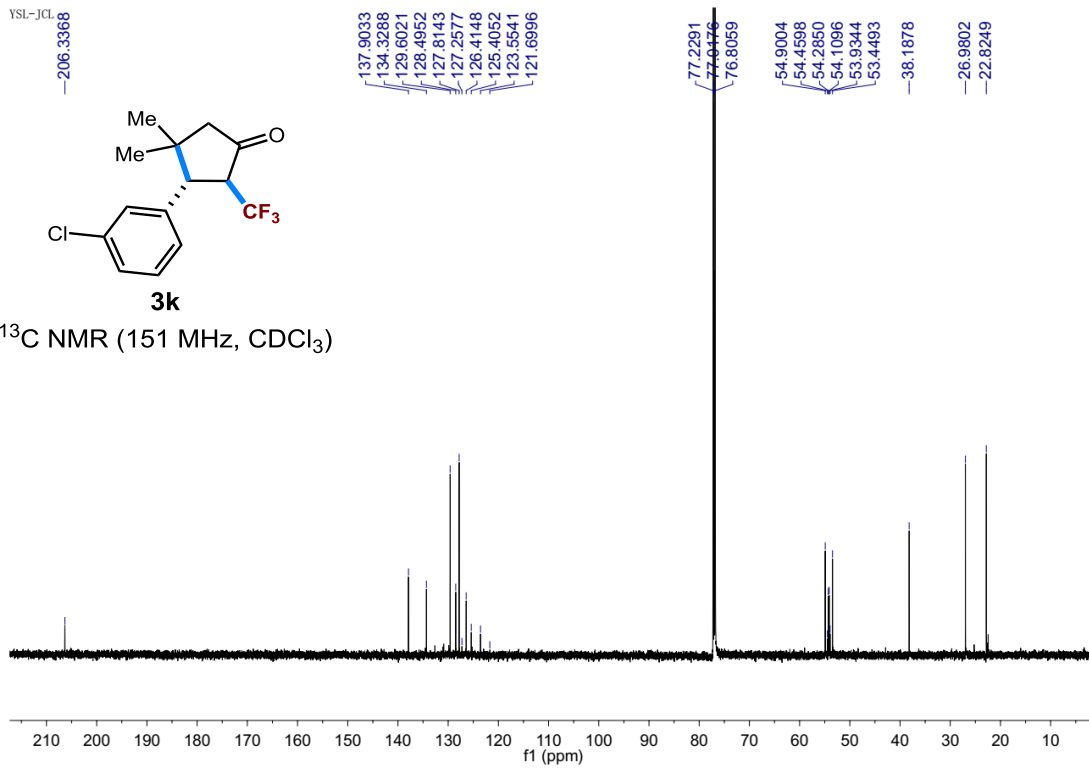



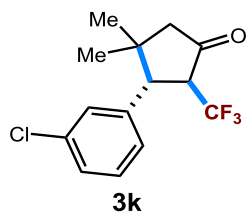

$^{19}\text{F}$  NMR (565 MHz,  $\text{CDCl}_3$ )

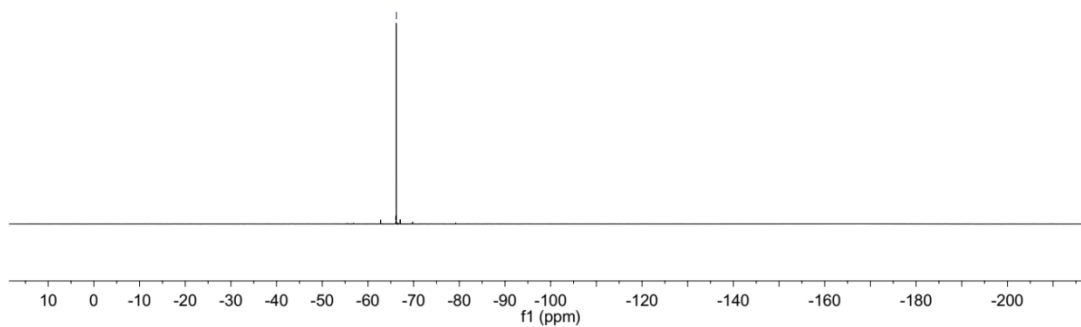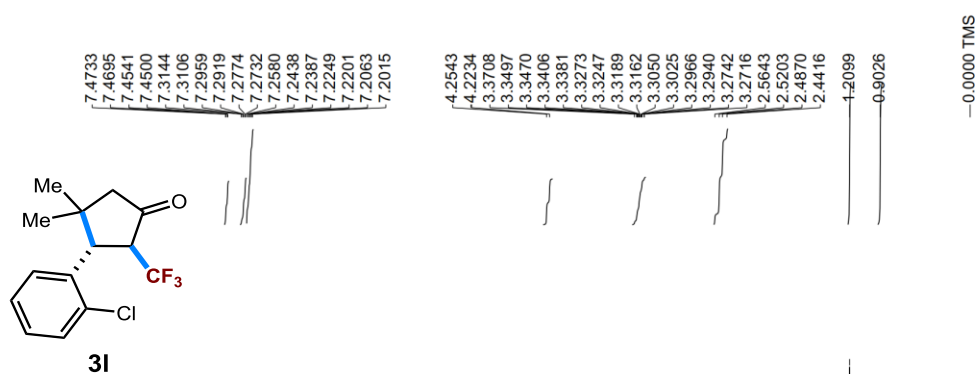

$^1\text{H}$  NMR (400 MHz,  $\text{CDCl}_3$ )

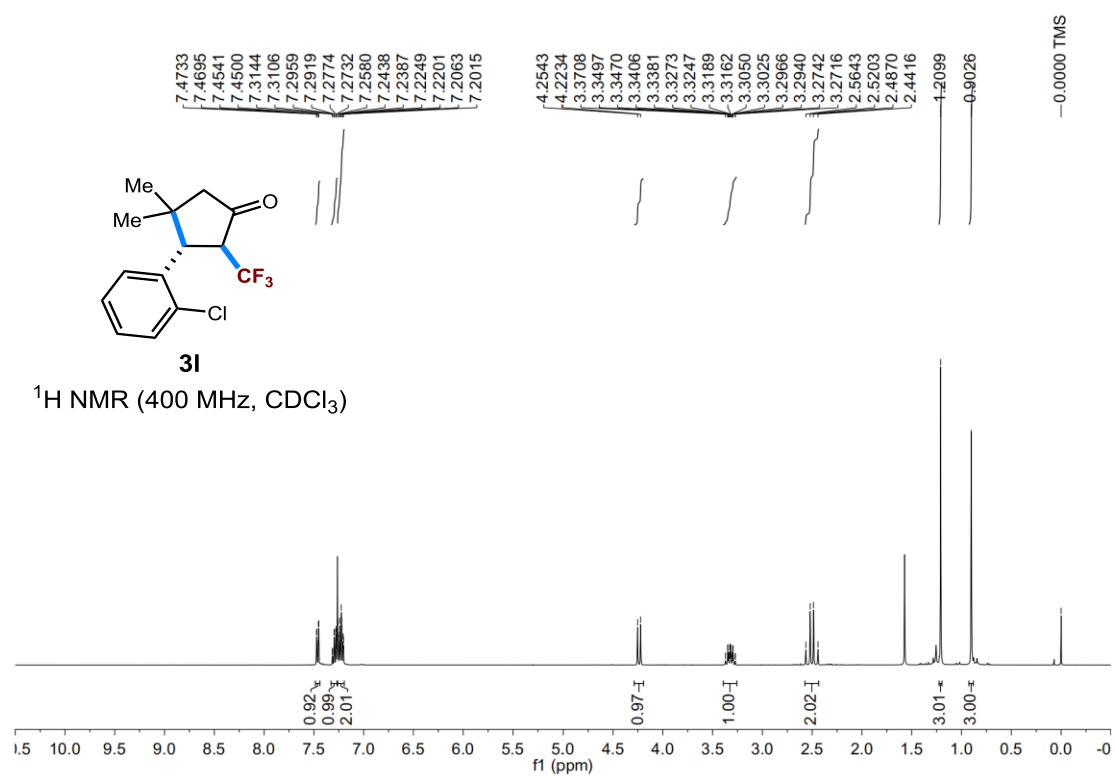

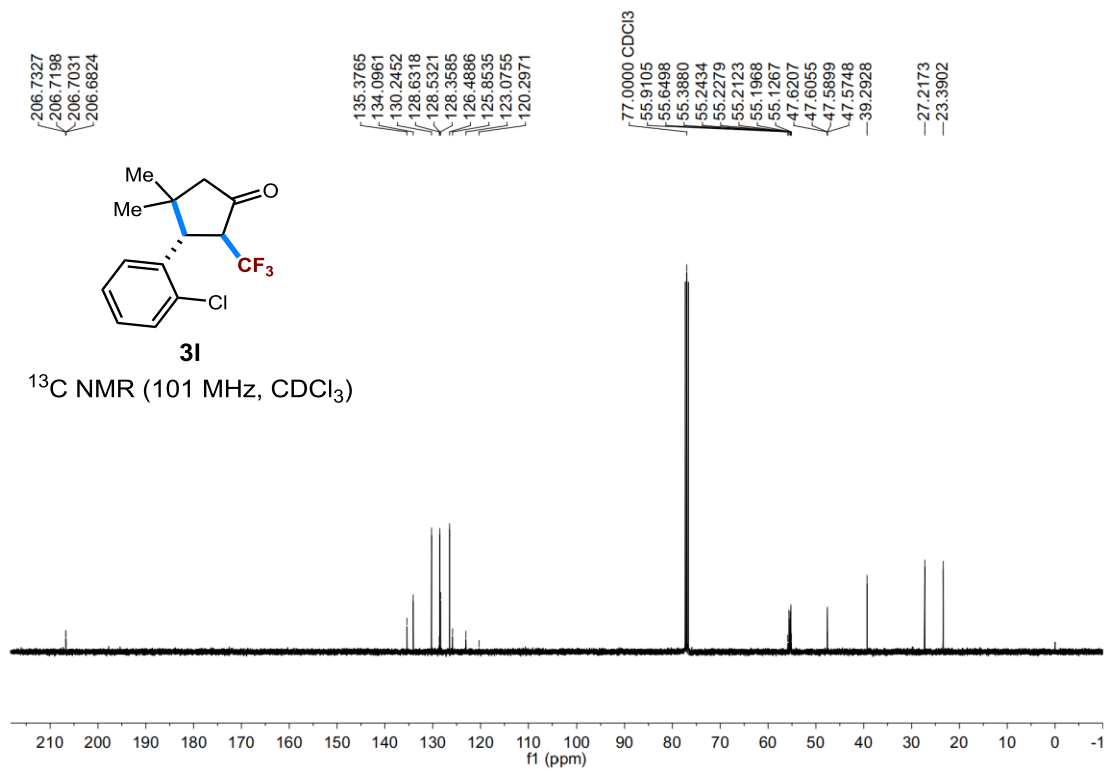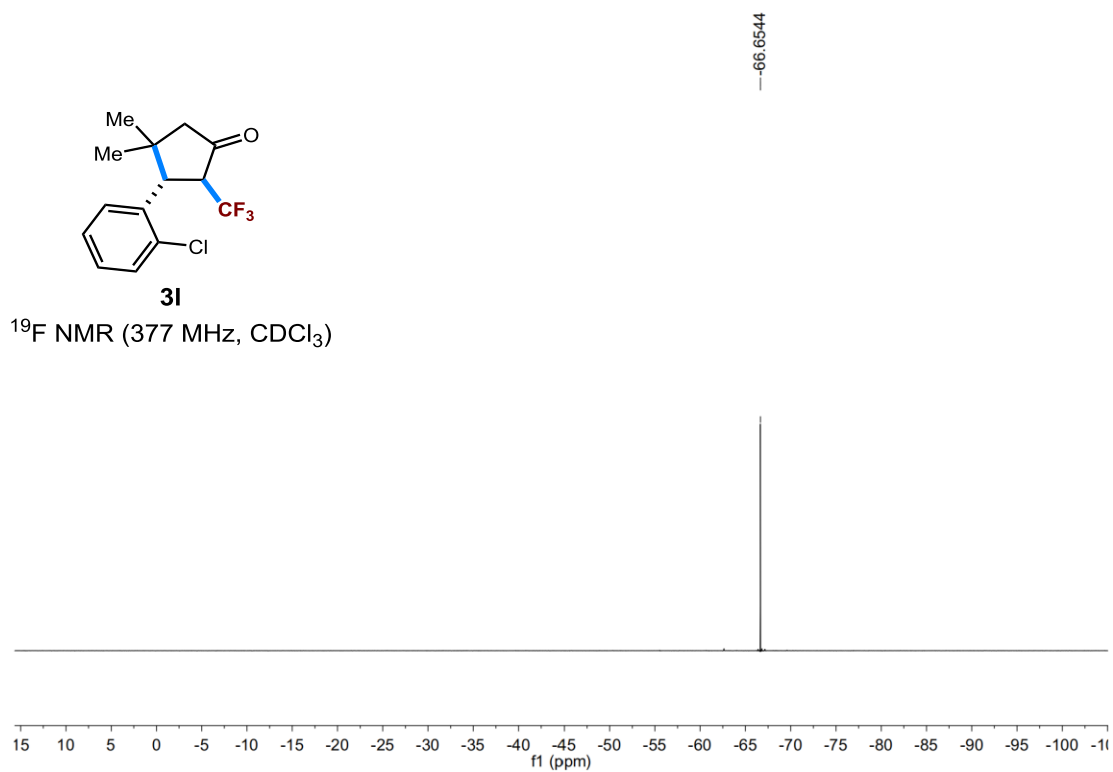

ysl-20me

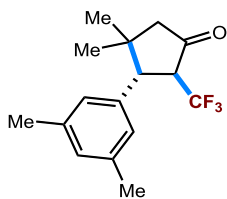

**3m**

$^1\text{H NMR}$  (600 MHz,  $\text{CDCl}_3$ )

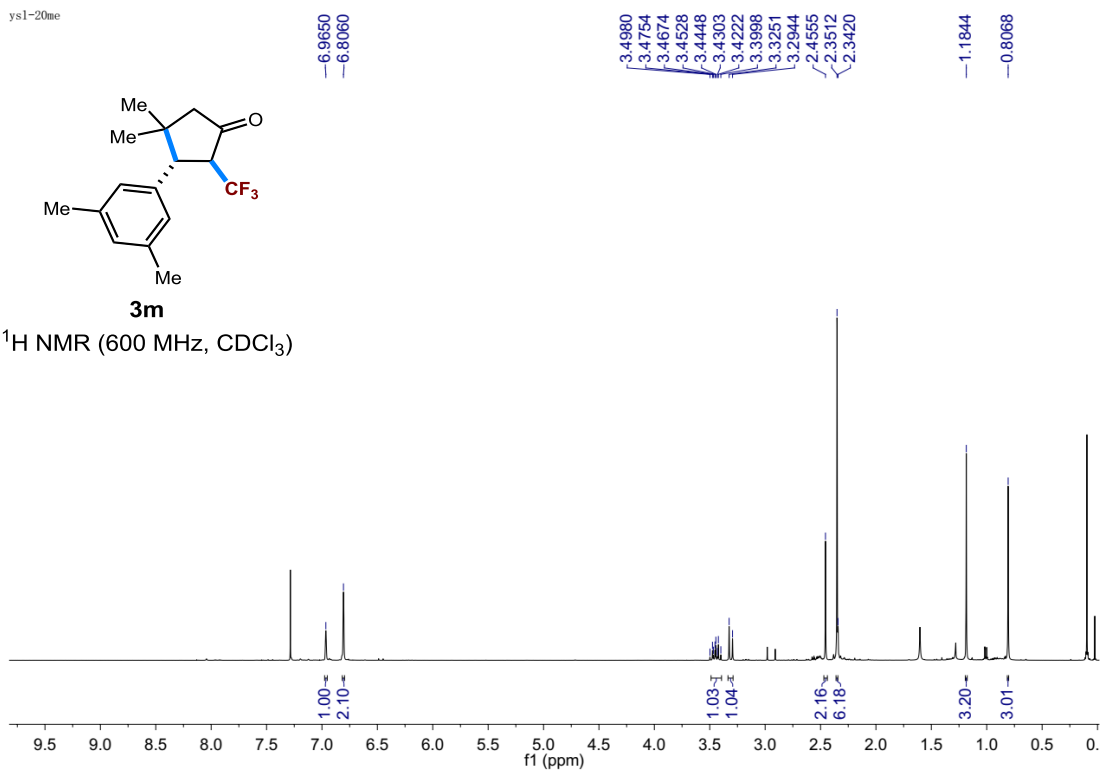

YSL-20M

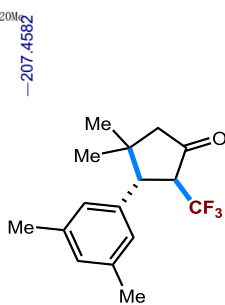

**3m**

$^{13}\text{C NMR}$  (151 MHz,  $\text{CDCl}_3$ )

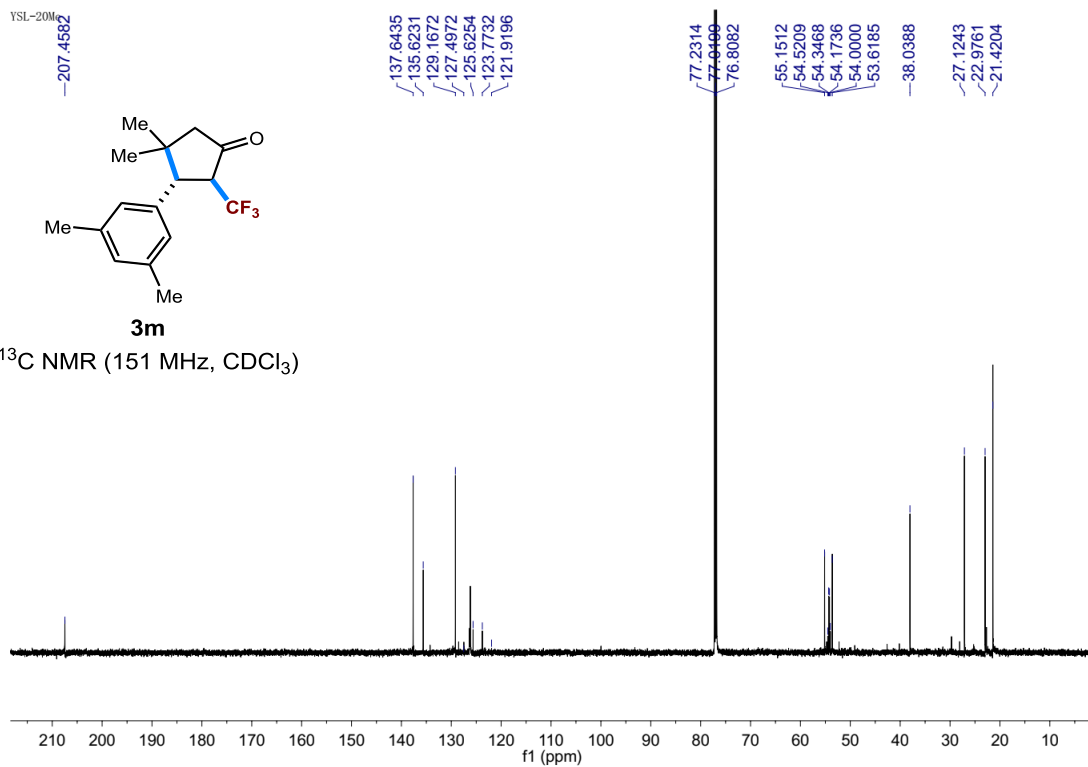

ys1-20me

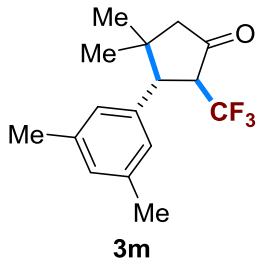

$^{19}\text{F}$  NMR (565 MHz,  $\text{CDCl}_3$ )

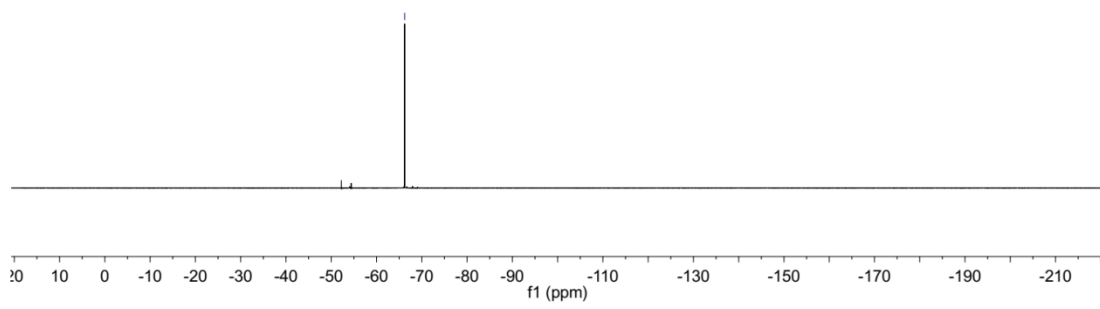

YSL-KT2-312

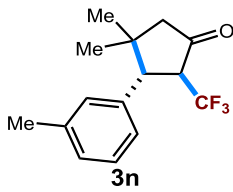

$^1\text{H}$  NMR (600 MHz,  $\text{CDCl}_3$ )

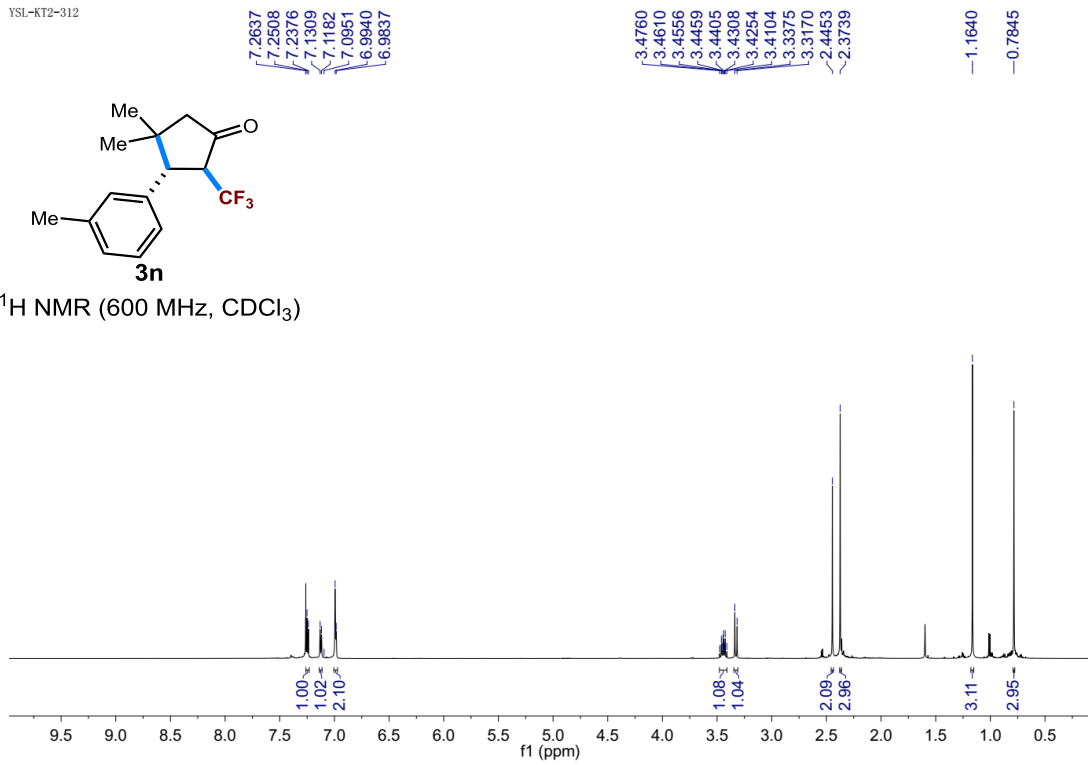

YSL-KT2-312

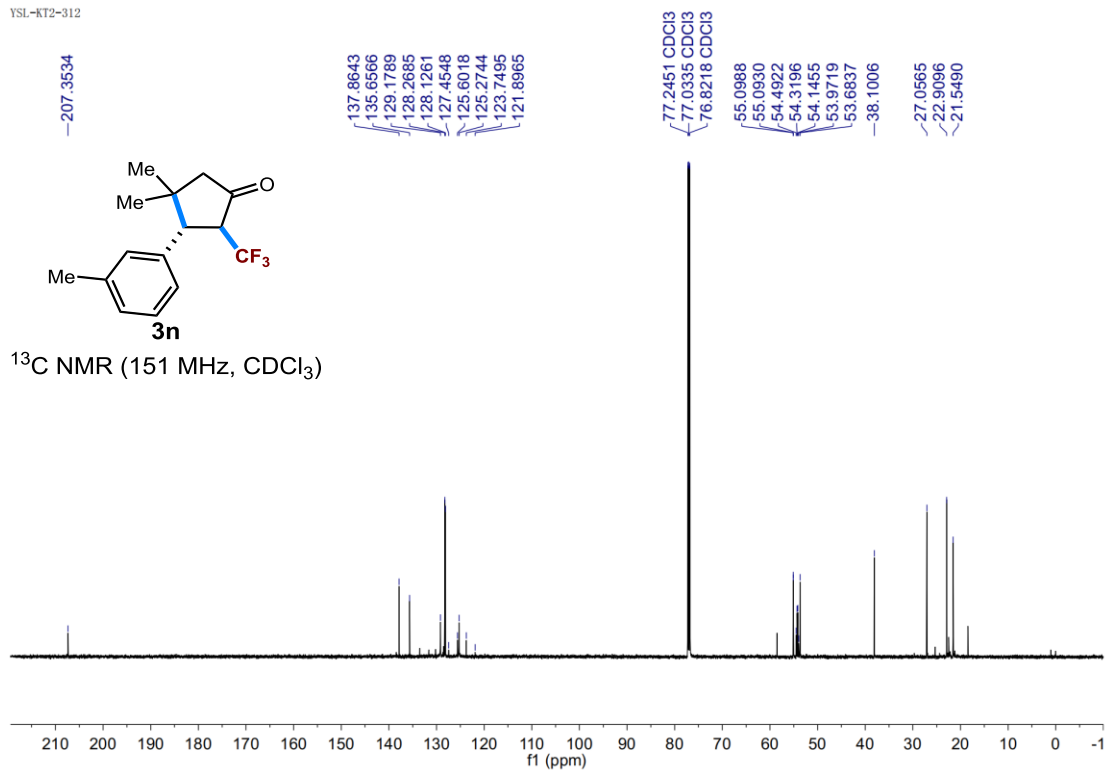

YSL-KT2-312

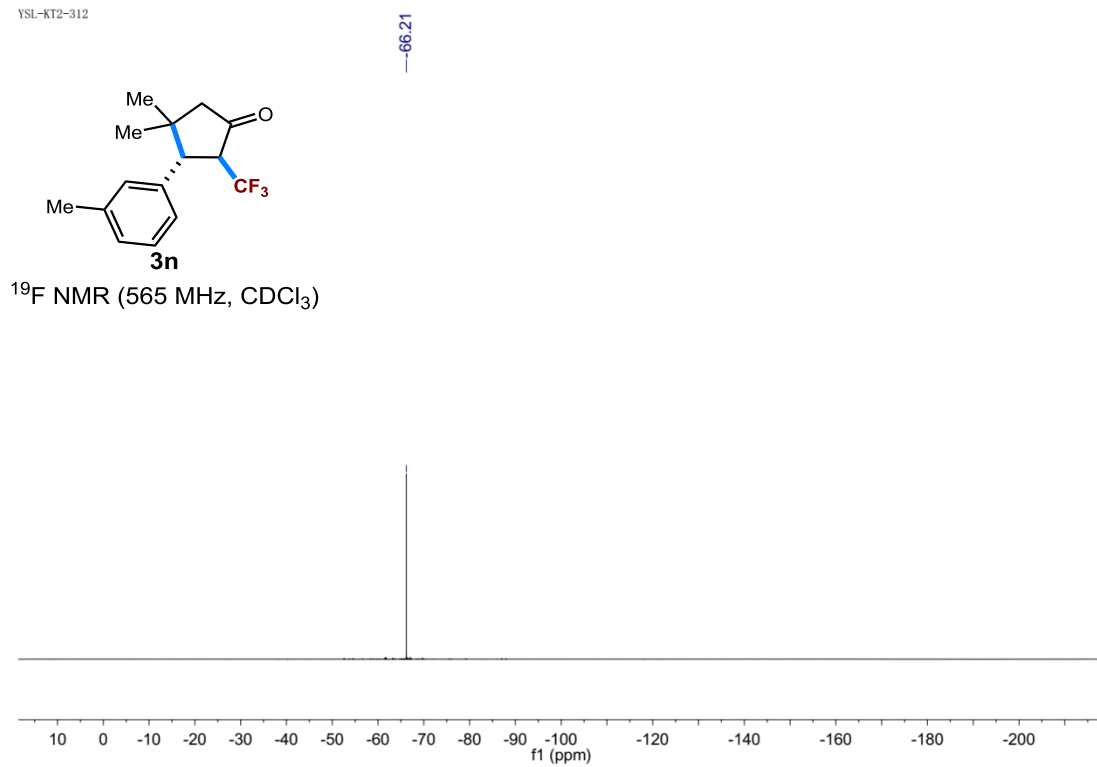

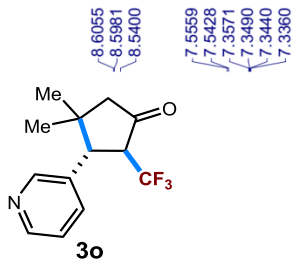

$^1\text{H}$  NMR (600 MHz,  $\text{CDCl}_3$ )

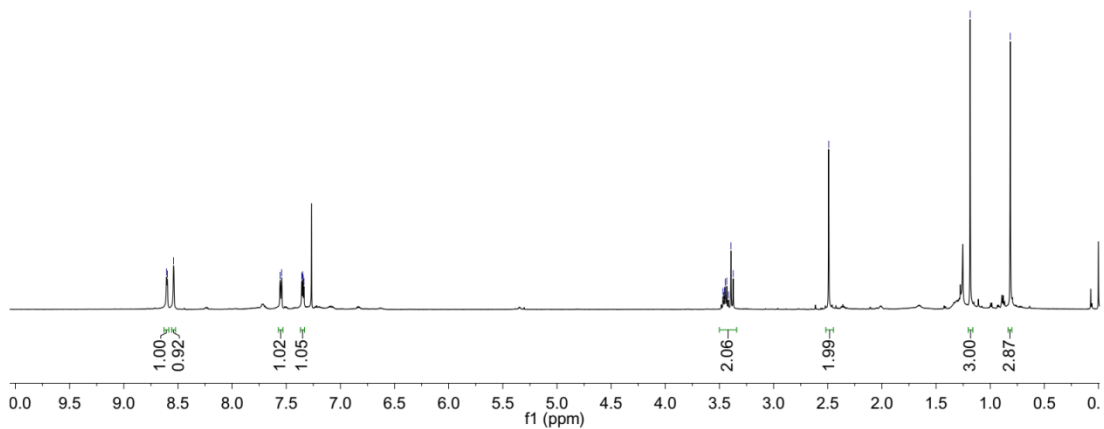

YSL-KT2-235

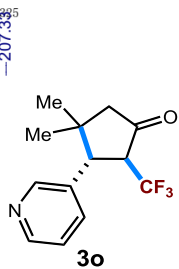

$^{13}\text{C}$  NMR (151 MHz,  $\text{CDCl}_3$ )

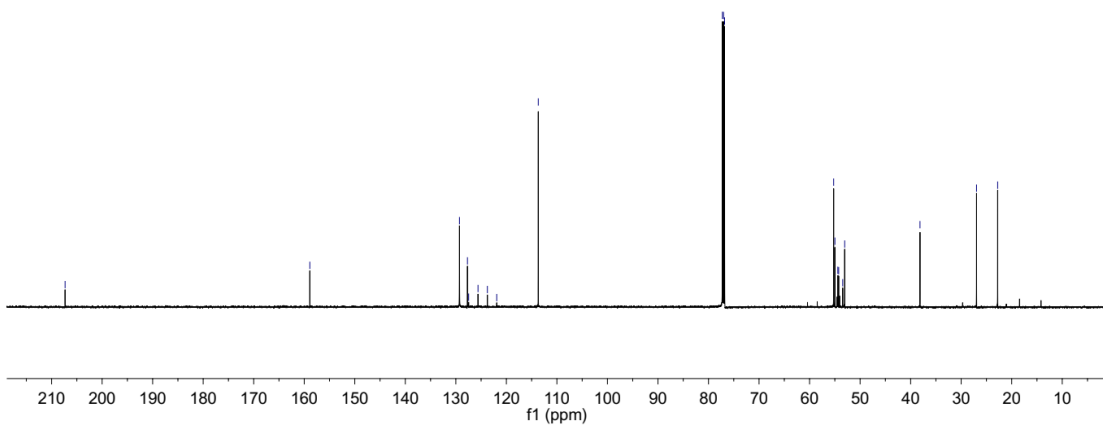

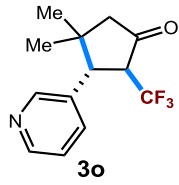

$^{19}\text{F}$  NMR (565 MHz,  $\text{CDCl}_3$ )

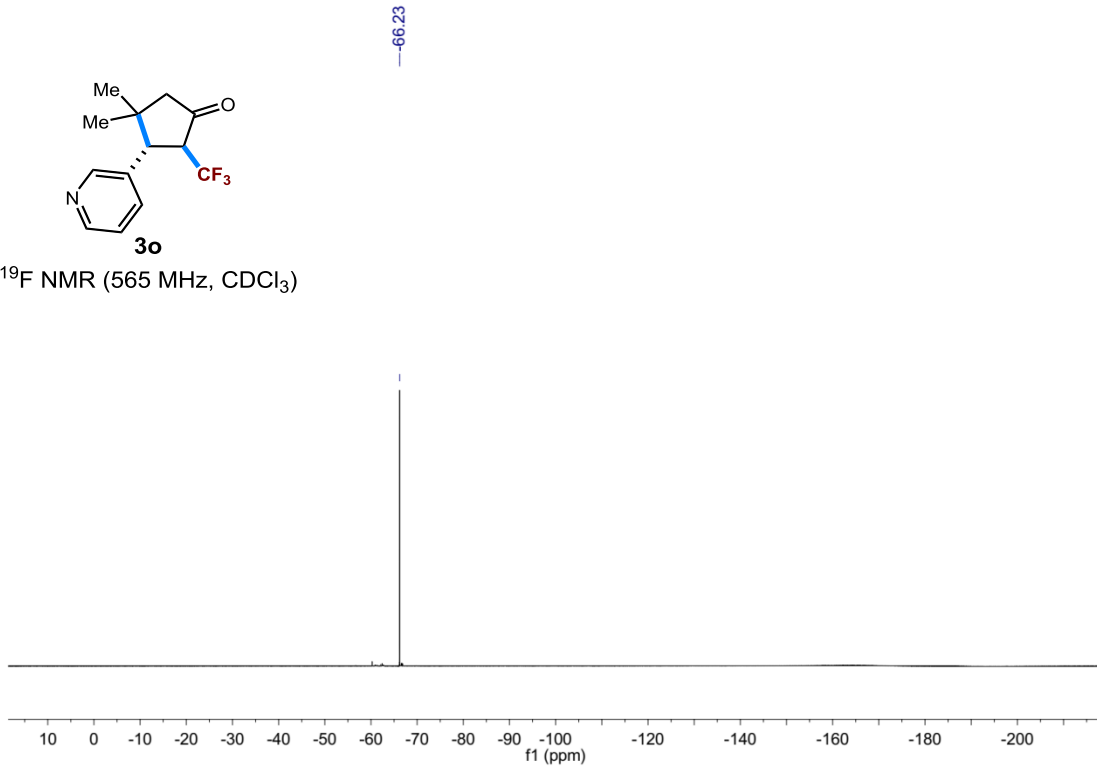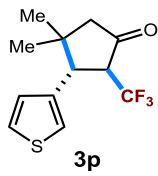

$^1\text{H}$  NMR (600 MHz,  $\text{CDCl}_3$ )

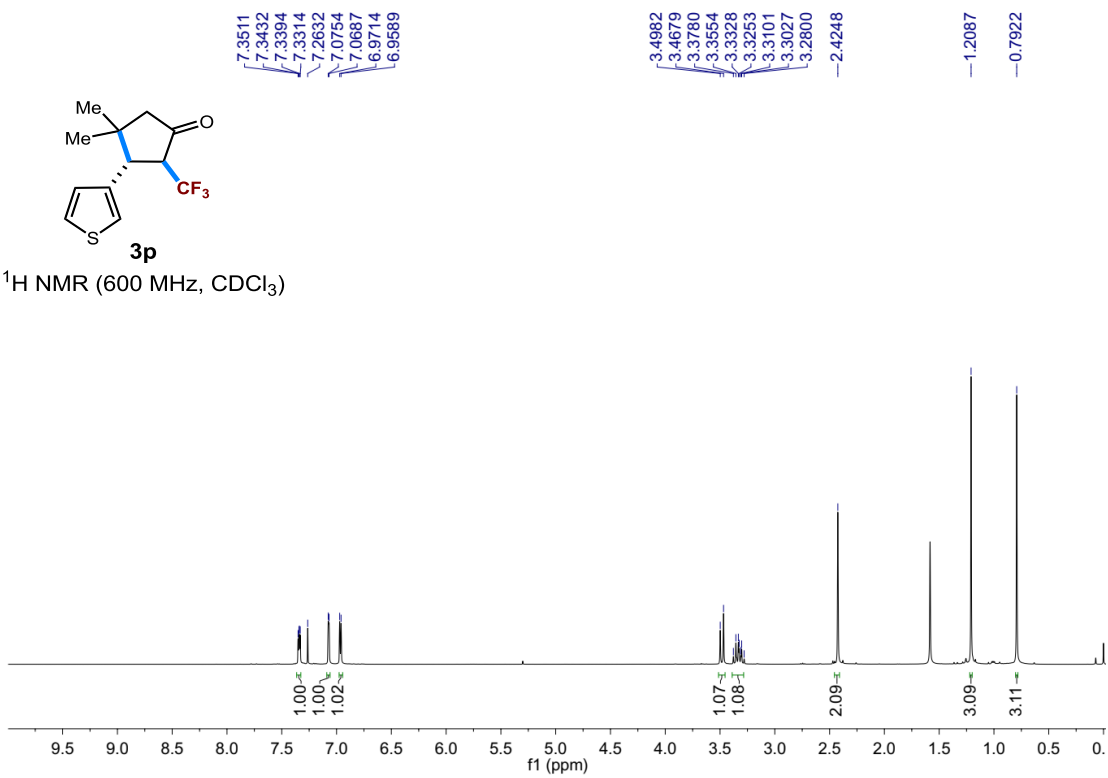

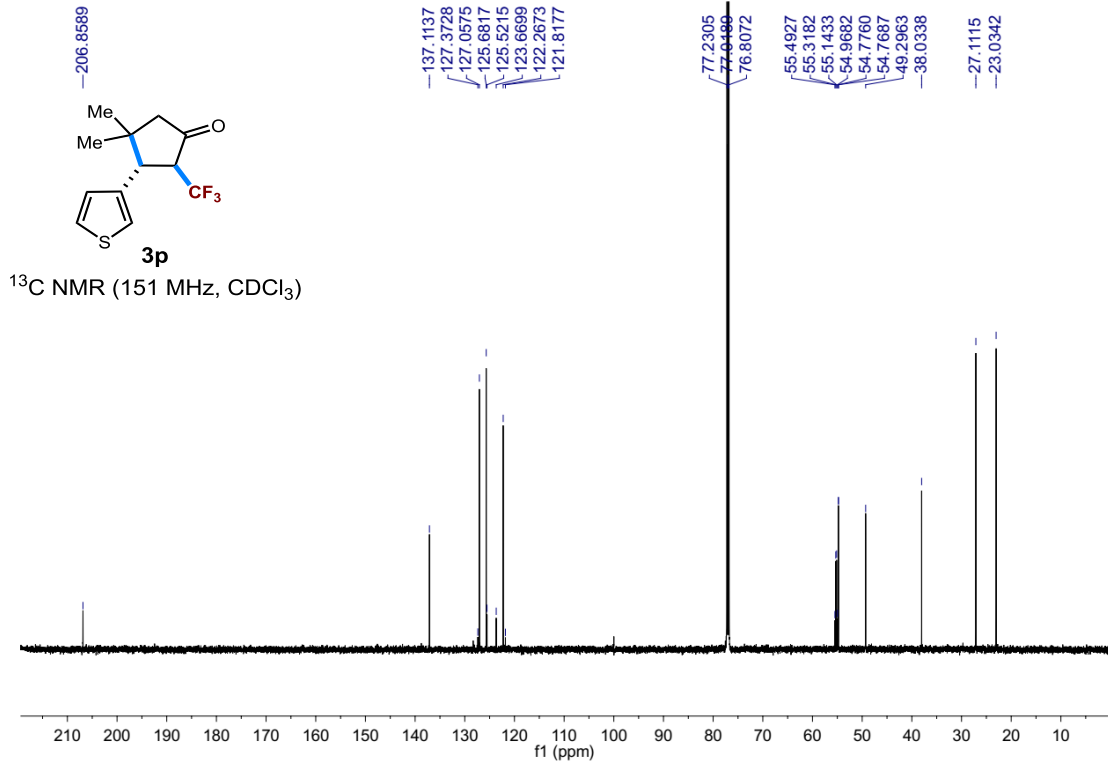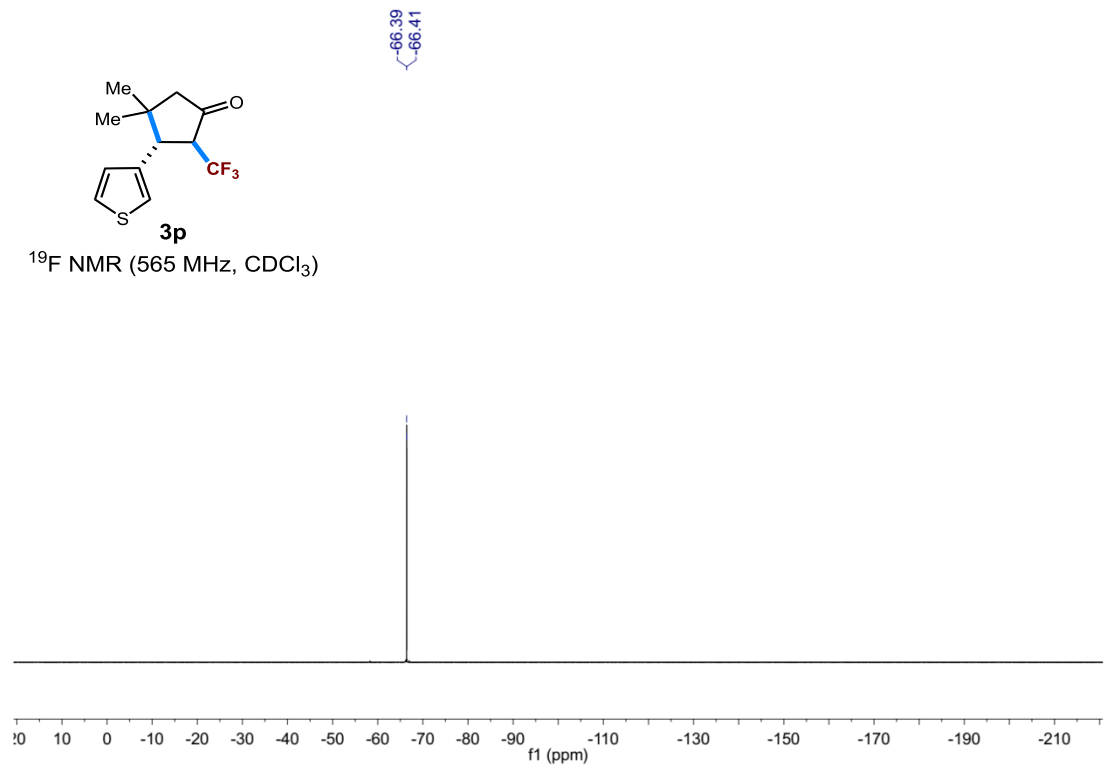



YSL-KT2-347

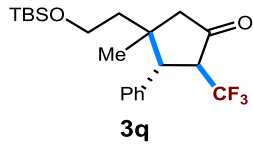

<sup>1</sup>H NMR (600 MHz, CDCl<sub>3</sub>)

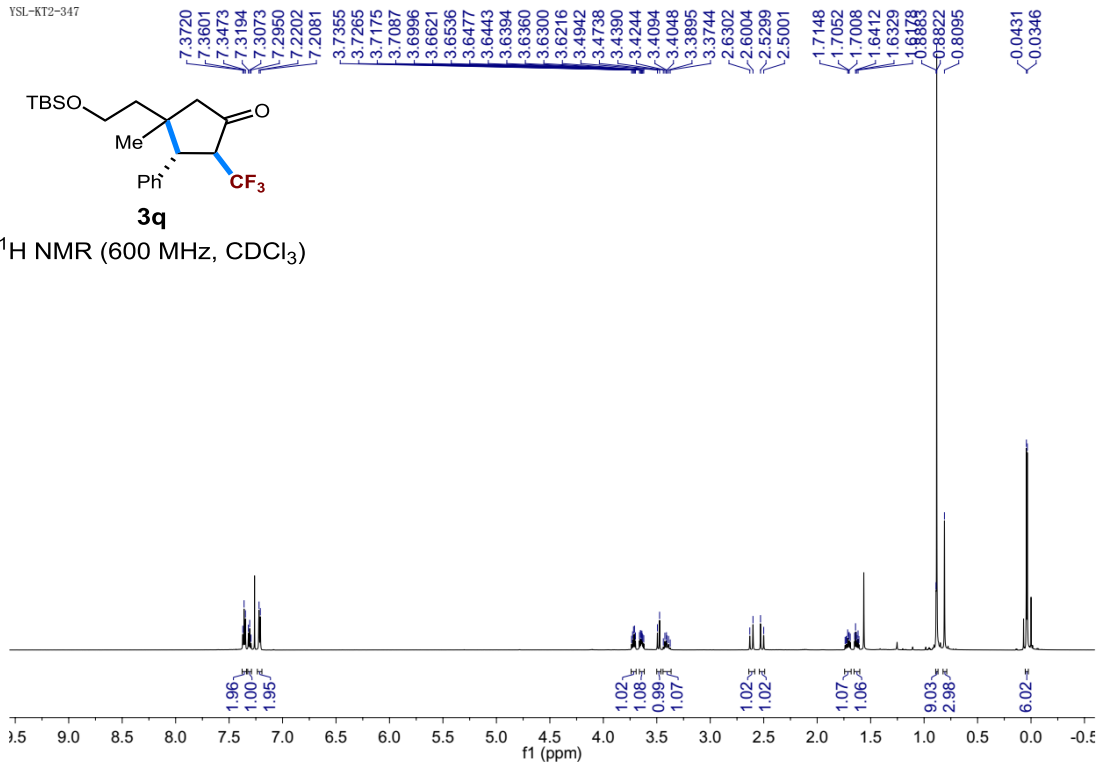

YSL-KT2-347

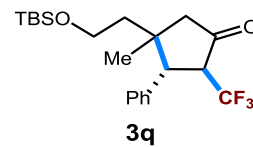

<sup>13</sup>C NMR (151 MHz, CDCl<sub>3</sub>)

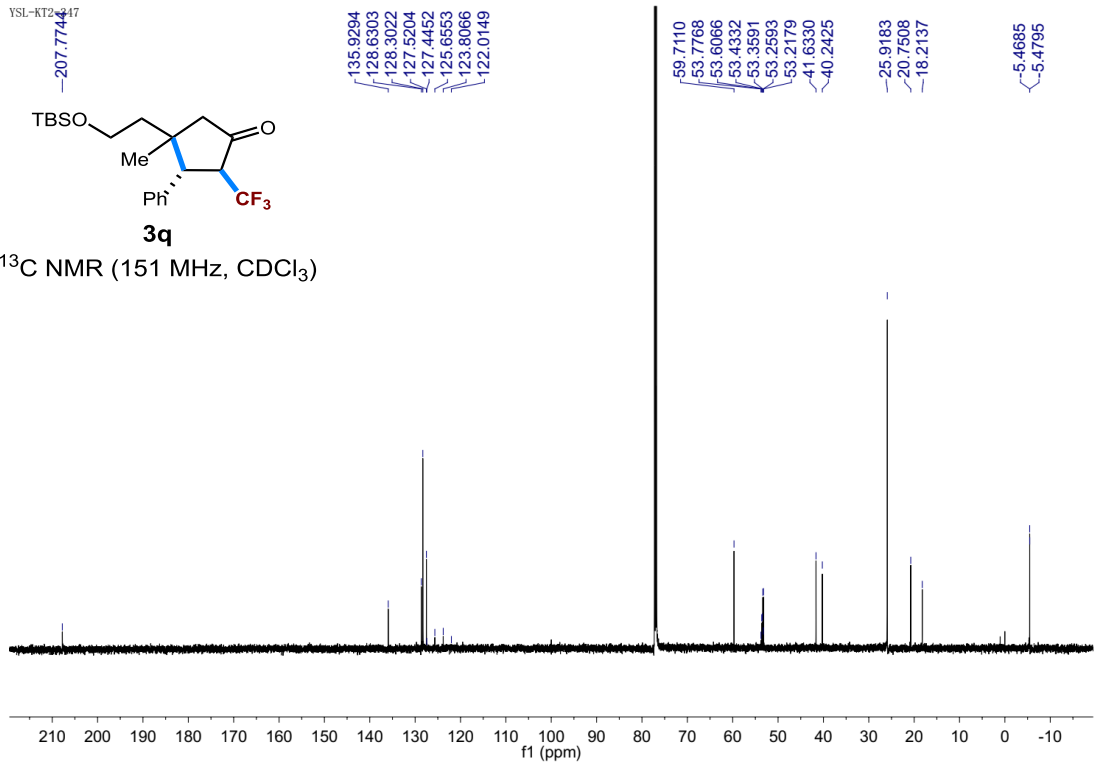

YSL-KT2-347

-66.14

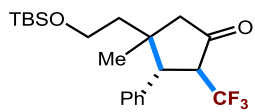

**3q**

$^{19}\text{F}$  NMR (565 MHz,  $\text{CDCl}_3$ )

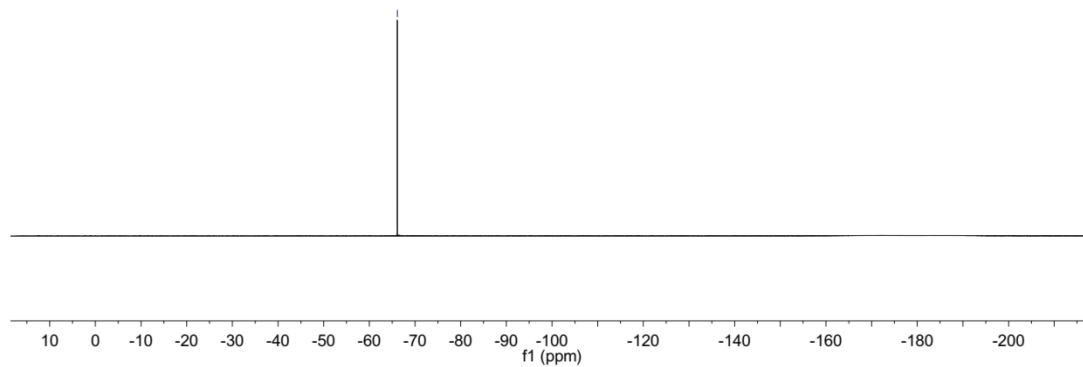

YSL-KT2-339

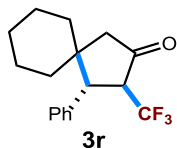

**3r**

$^1\text{H}$  NMR (600 MHz,  $\text{CDCl}_3$ )

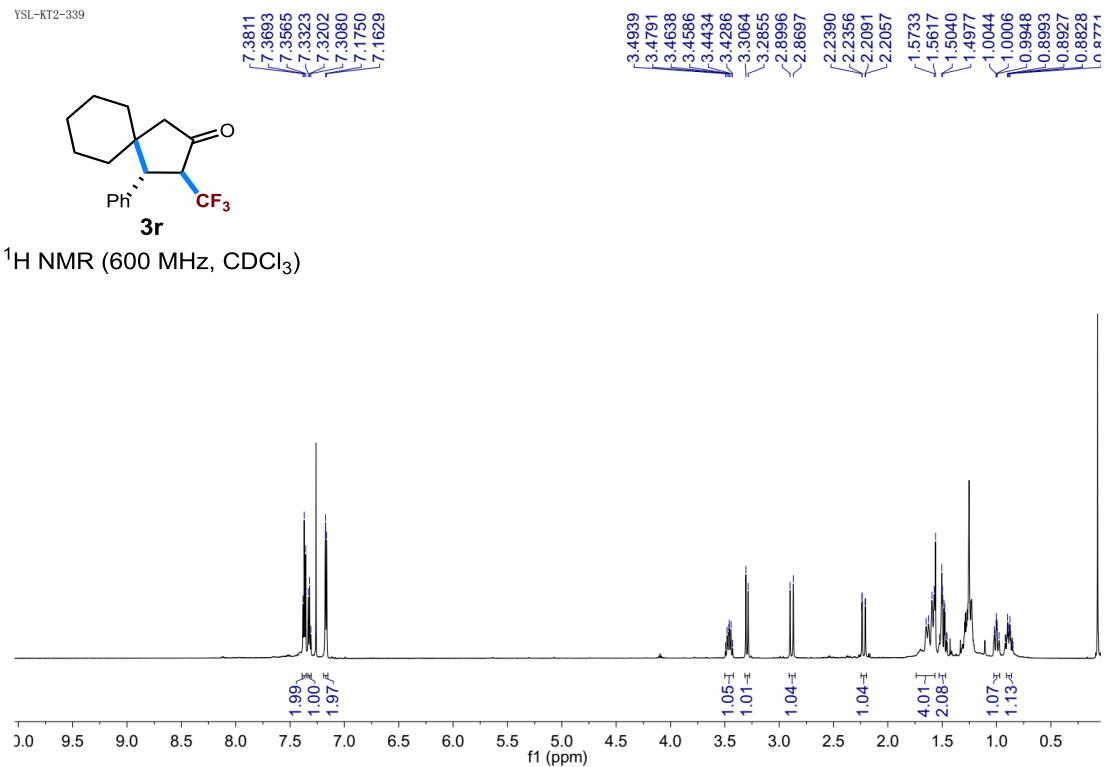

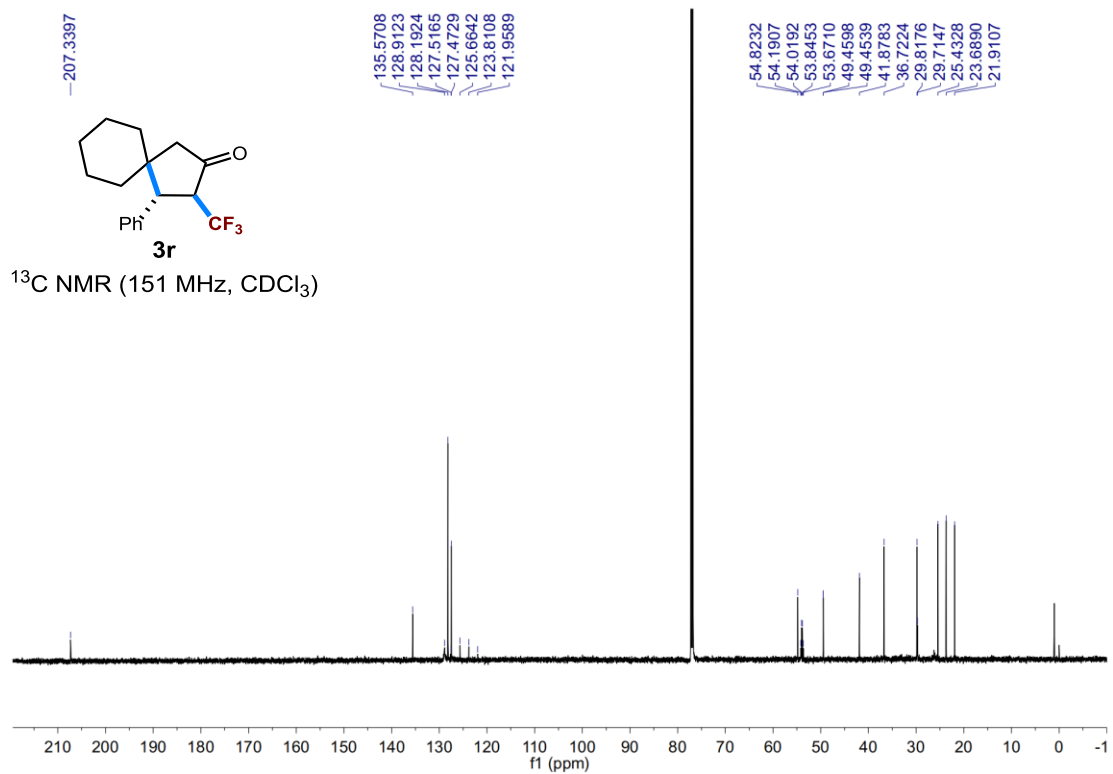

YSL-KT2-339

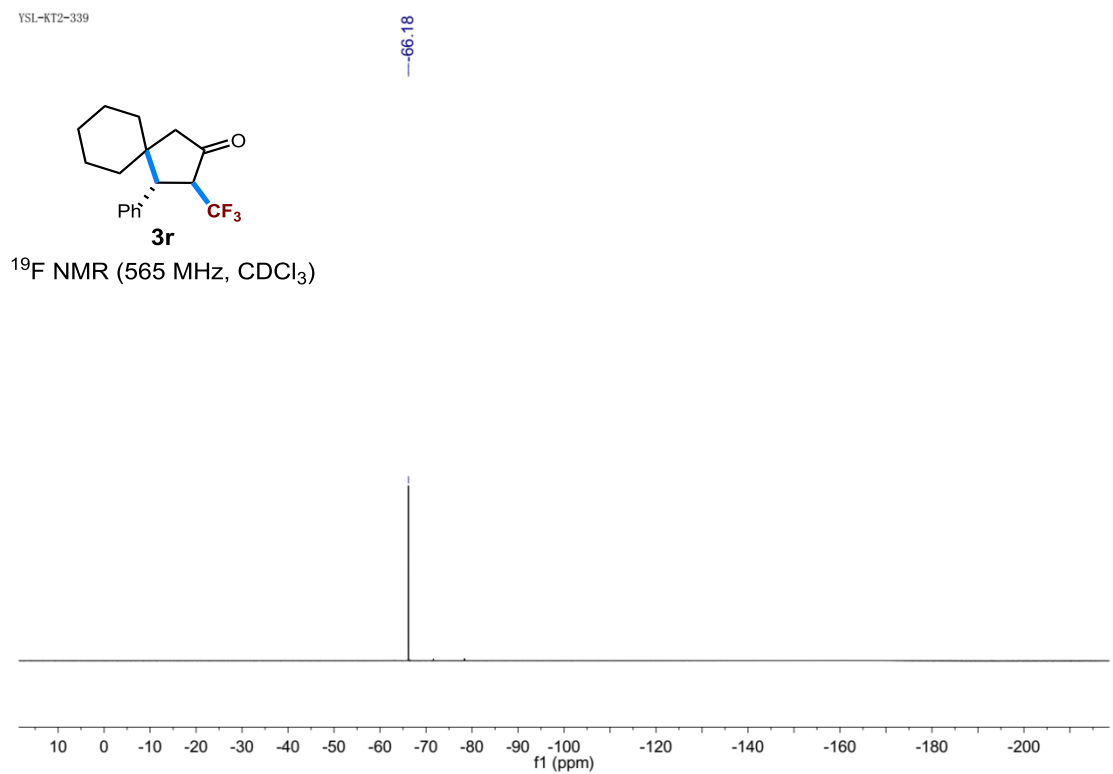

7.4064  
7.4037  
7.3944  
7.3815  
7.3465  
7.3374  
7.3341  
7.3308  
7.3220  
7.2358  
7.2337  
7.2217  
3.6414  
3.6209  
3.4542  
3.4391  
3.4340  
3.4189  
2.6376  
2.6080  
2.3871  
2.3576  
1.7523  
1.7482  
1.7433  
1.7328  
1.7392  
1.6186  
1.6161  
1.6096  
1.6068  
1.6039  
1.6019  
1.5949  
1.5859  
1.5823  
1.5773  
1.5732  
1.5680  
1.5637  
1.5594  
1.5550  
1.5502  
1.5446  
1.4720  
1.4624  
1.4583  
1.4518  
1.4473  
1.4432  
1.4383  
1.3627  
1.3444  
1.2677  
1.2585  
1.2549  
1.2515

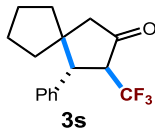

$^1\text{H NMR}$  (600 MHz,  $\text{CDCl}_3$ )

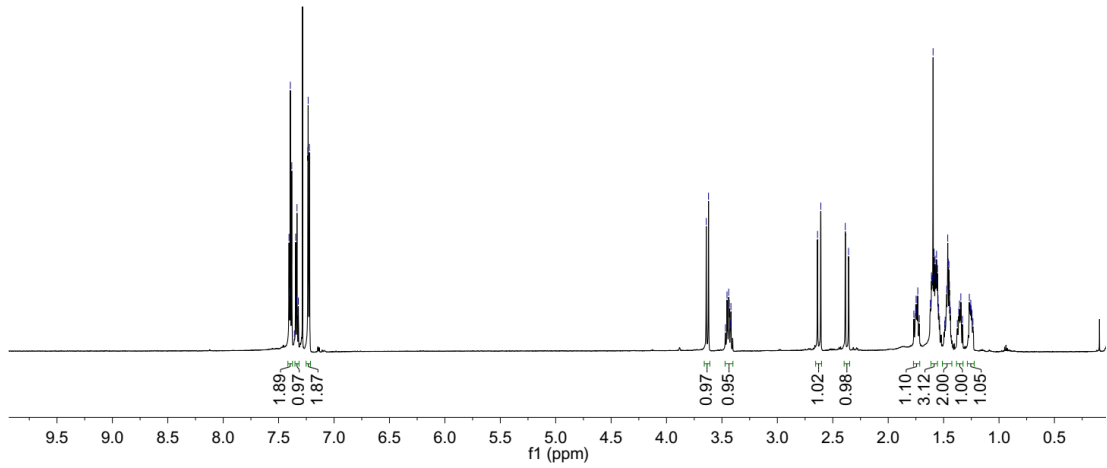

-207.0960

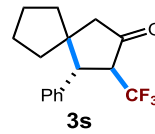

$^{13}\text{C NMR}$  (151 MHz,  $\text{CDCl}_3$ )

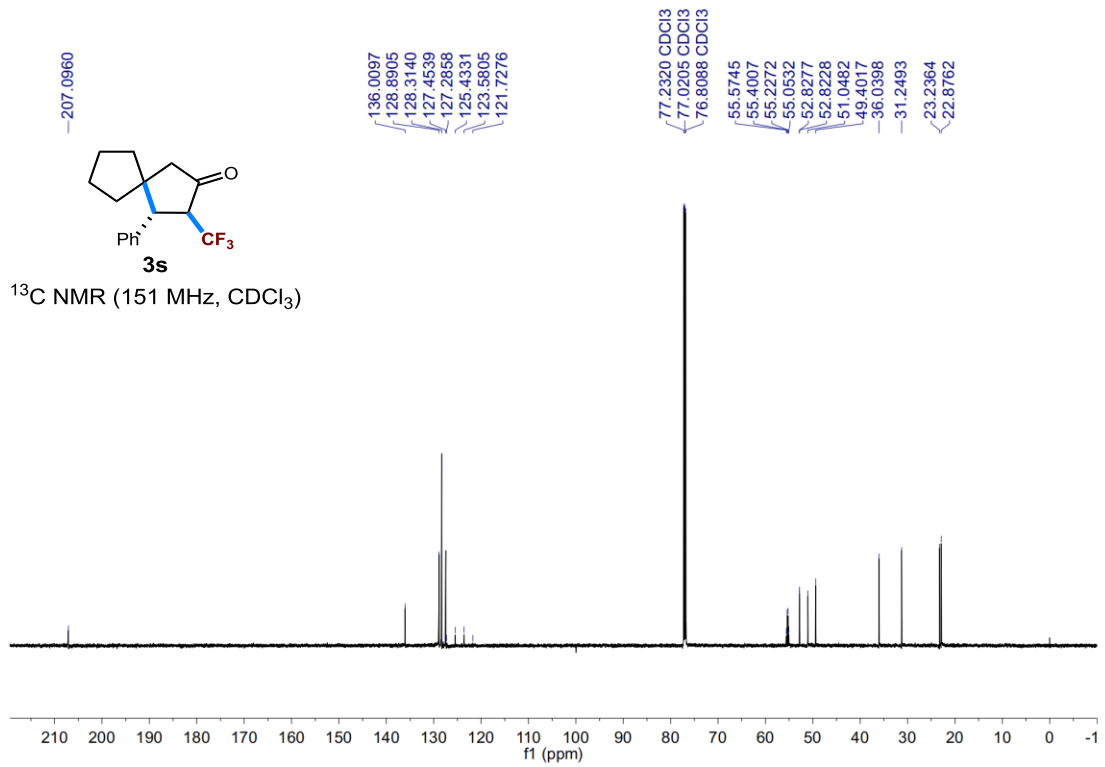

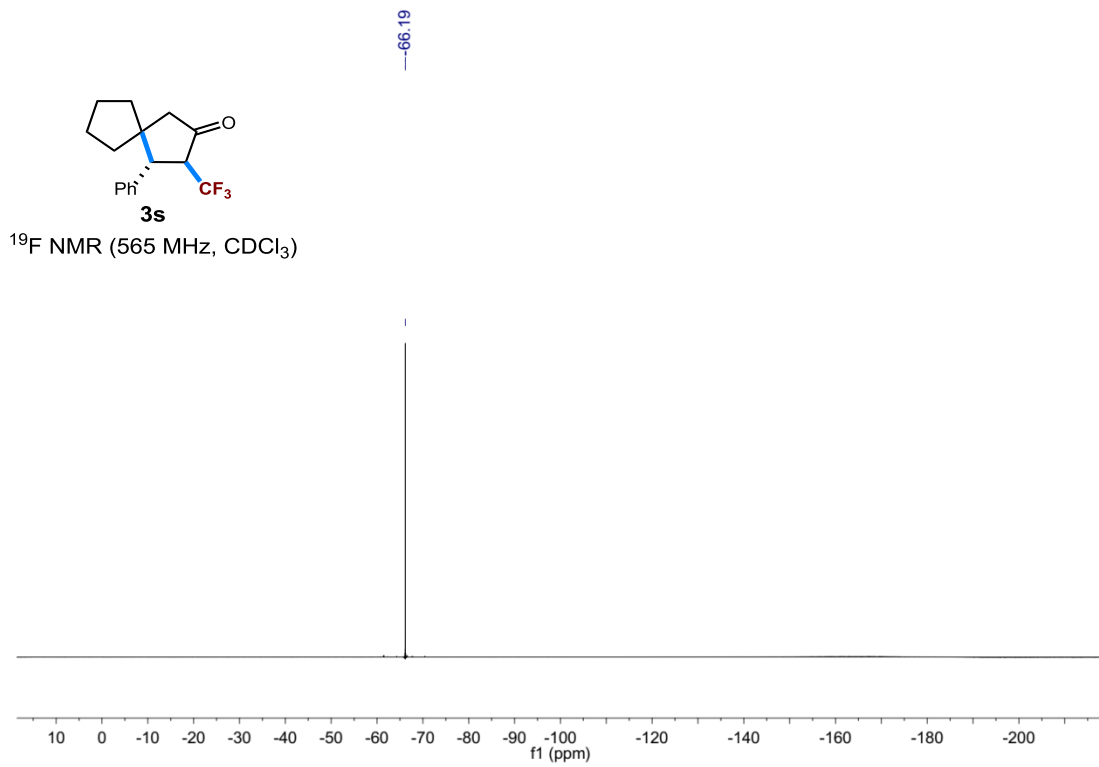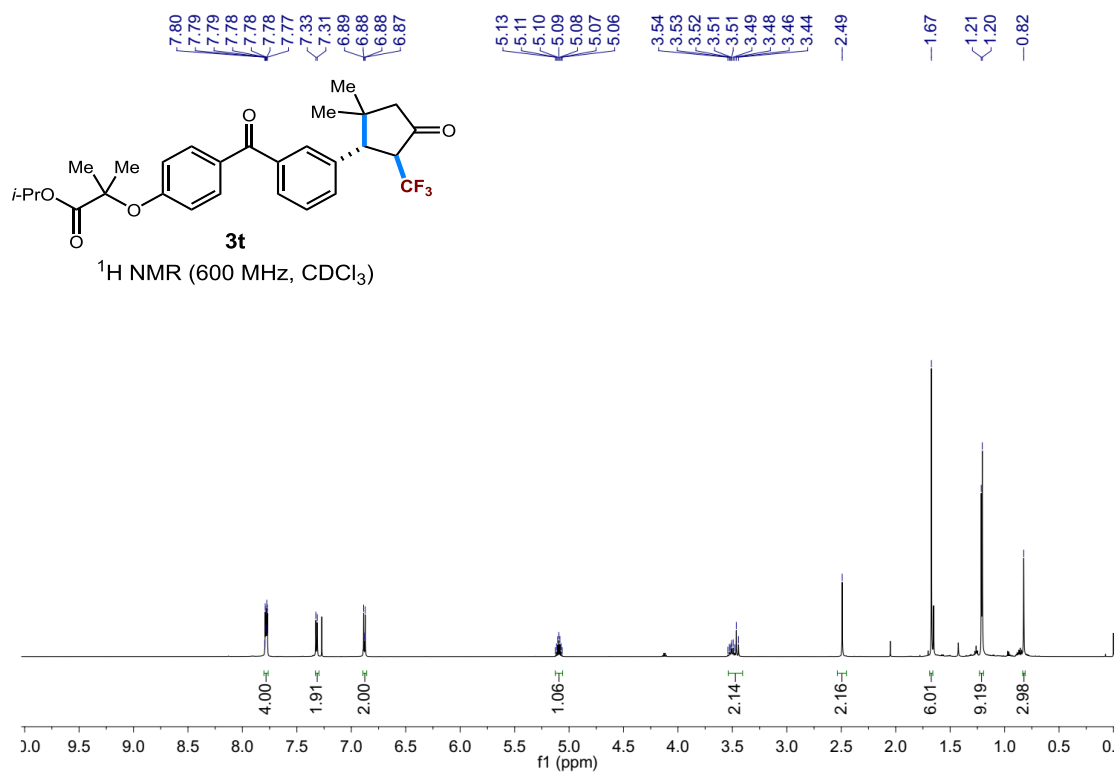

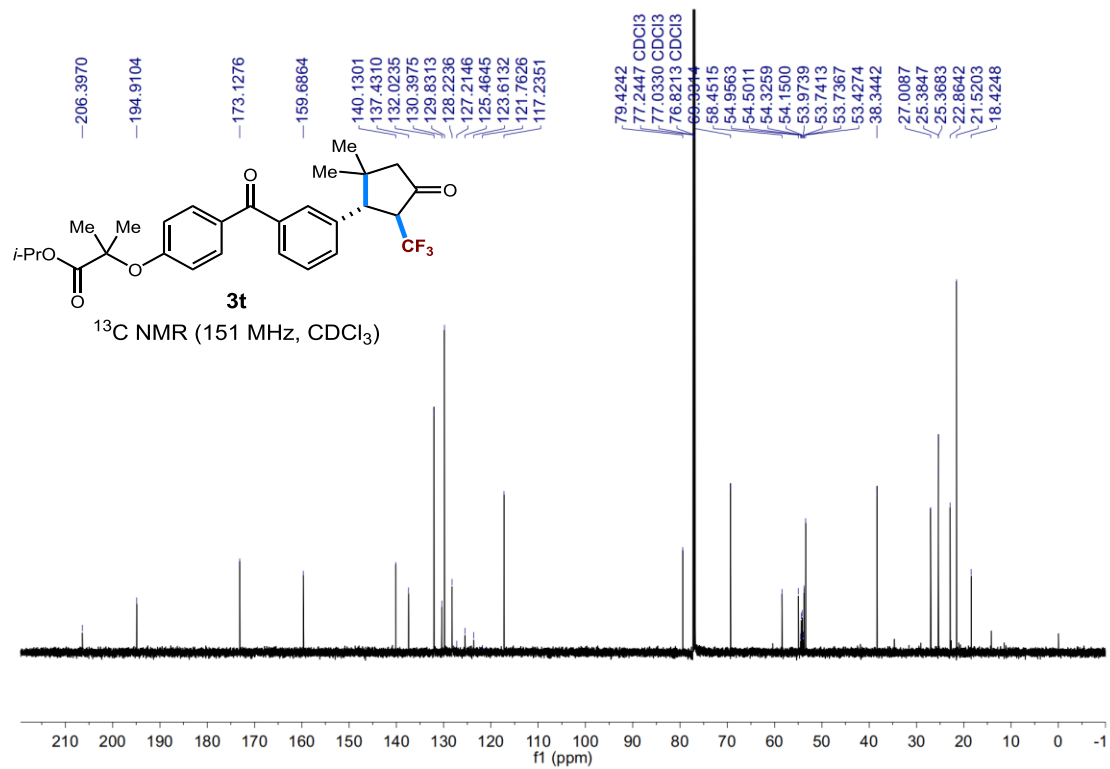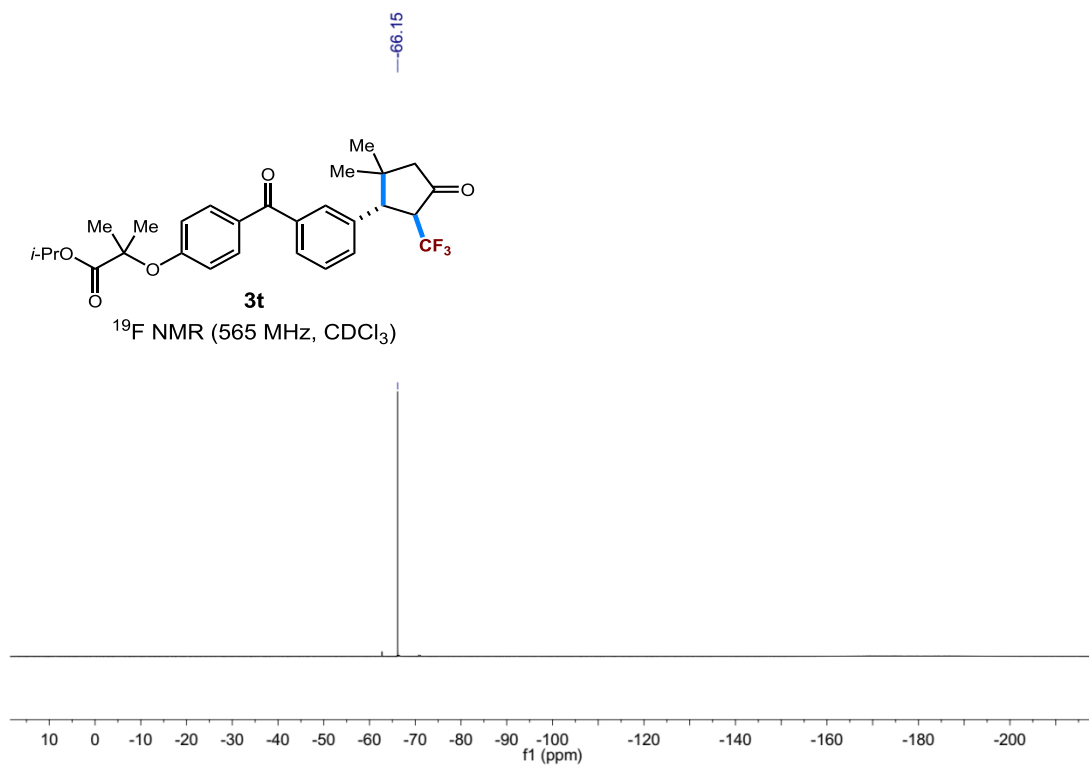

YSL-KT2-375-2

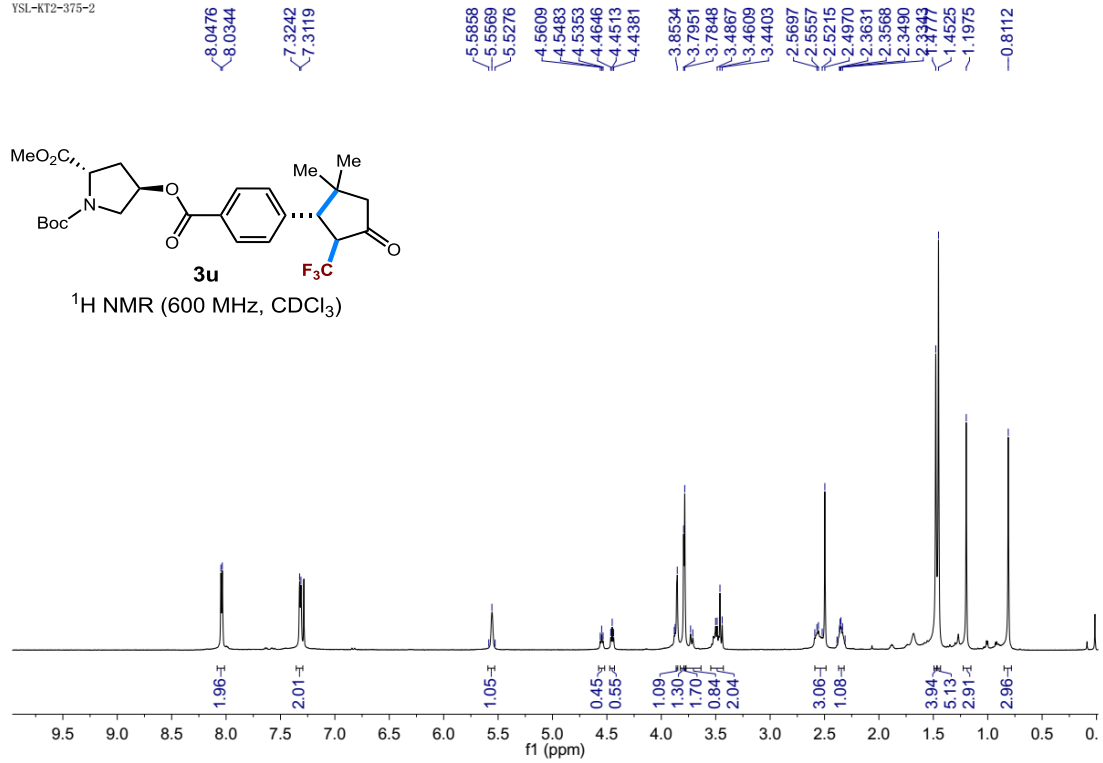

YSL-FB-3

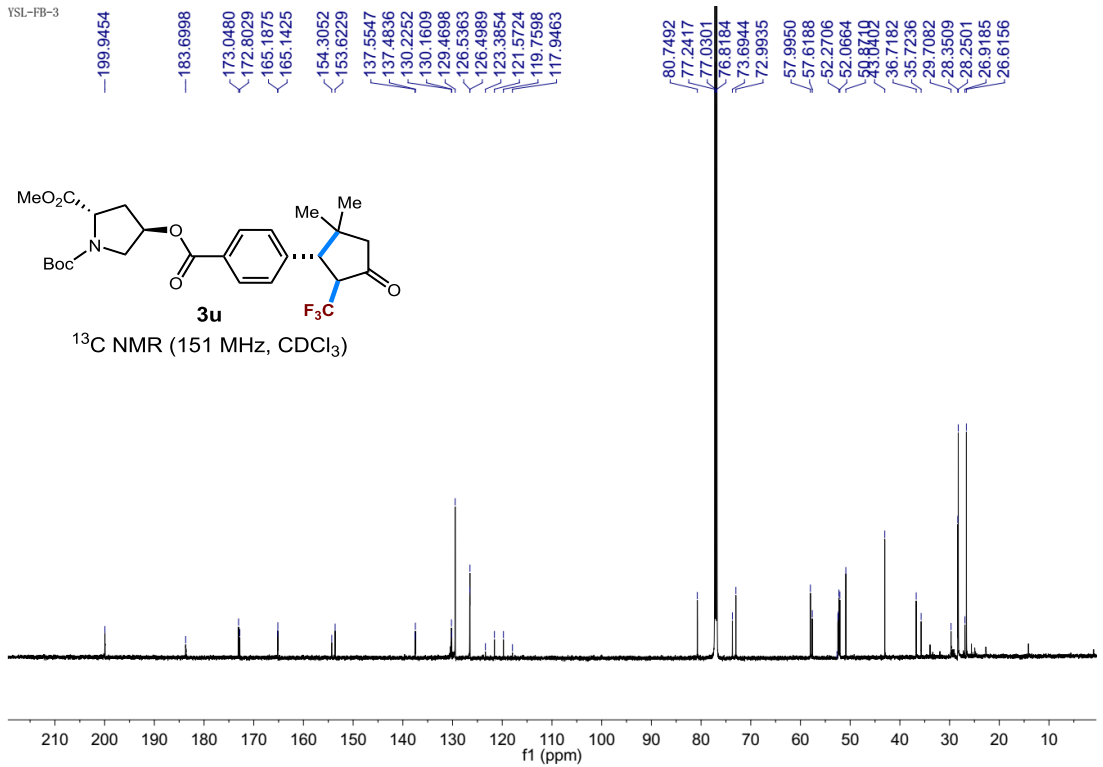

YSL-KT2-375-2

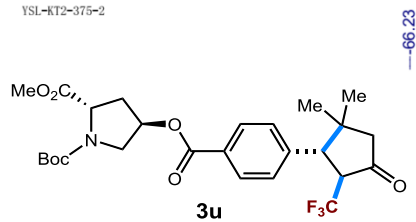

**3u**  
 $^{19}\text{F}$  NMR (565 MHz,  $\text{CDCl}_3$ )

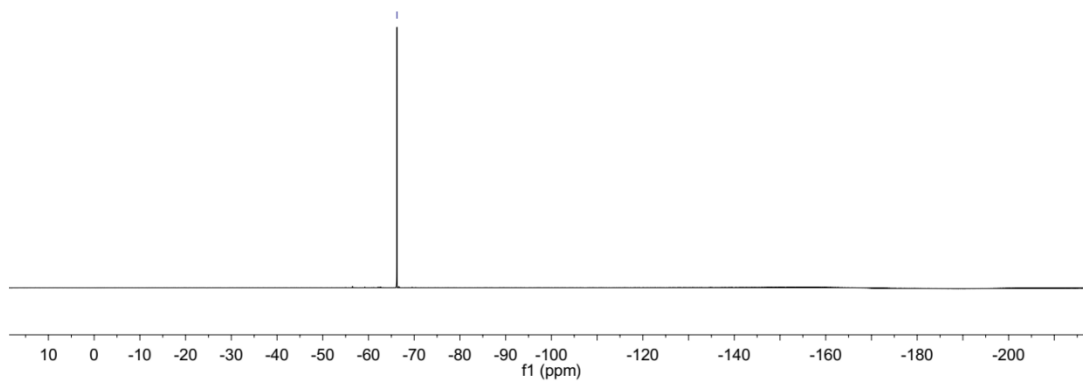

YSL-KT2-364

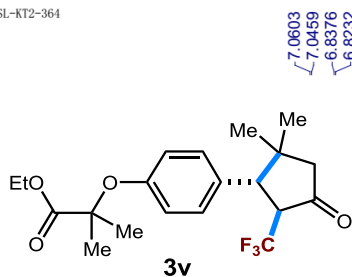

**3v**  
 $^1\text{H}$  NMR (600 MHz,  $\text{CDCl}_3$ )

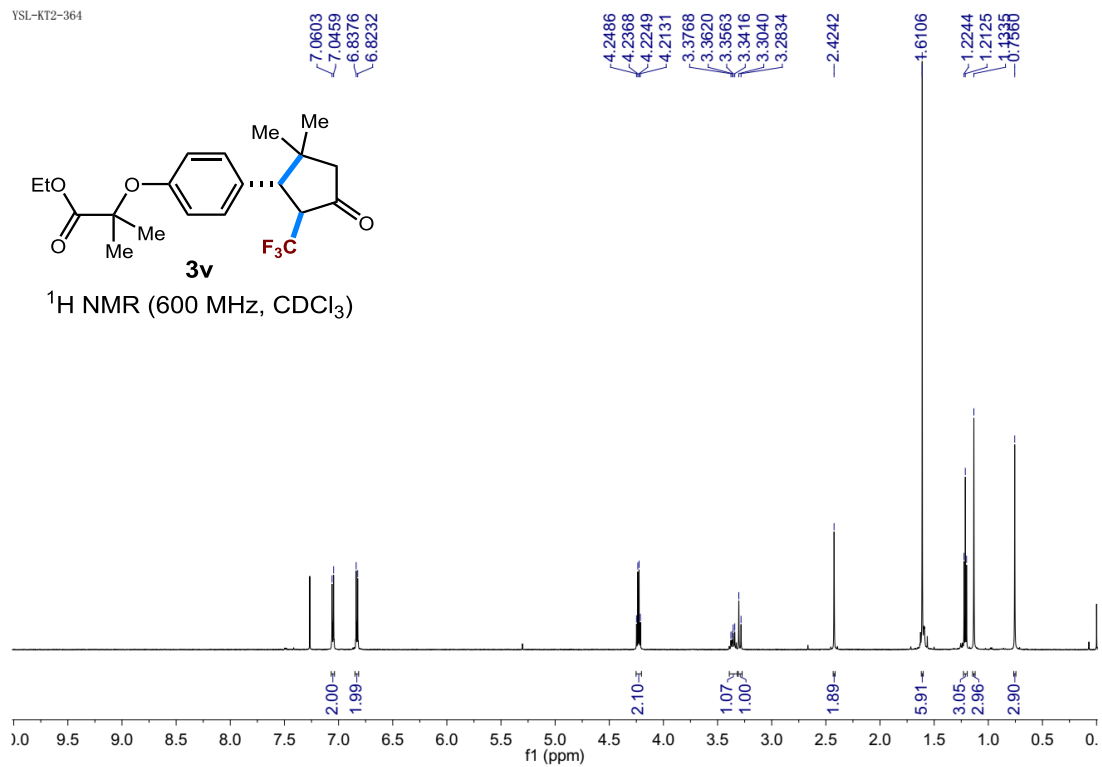



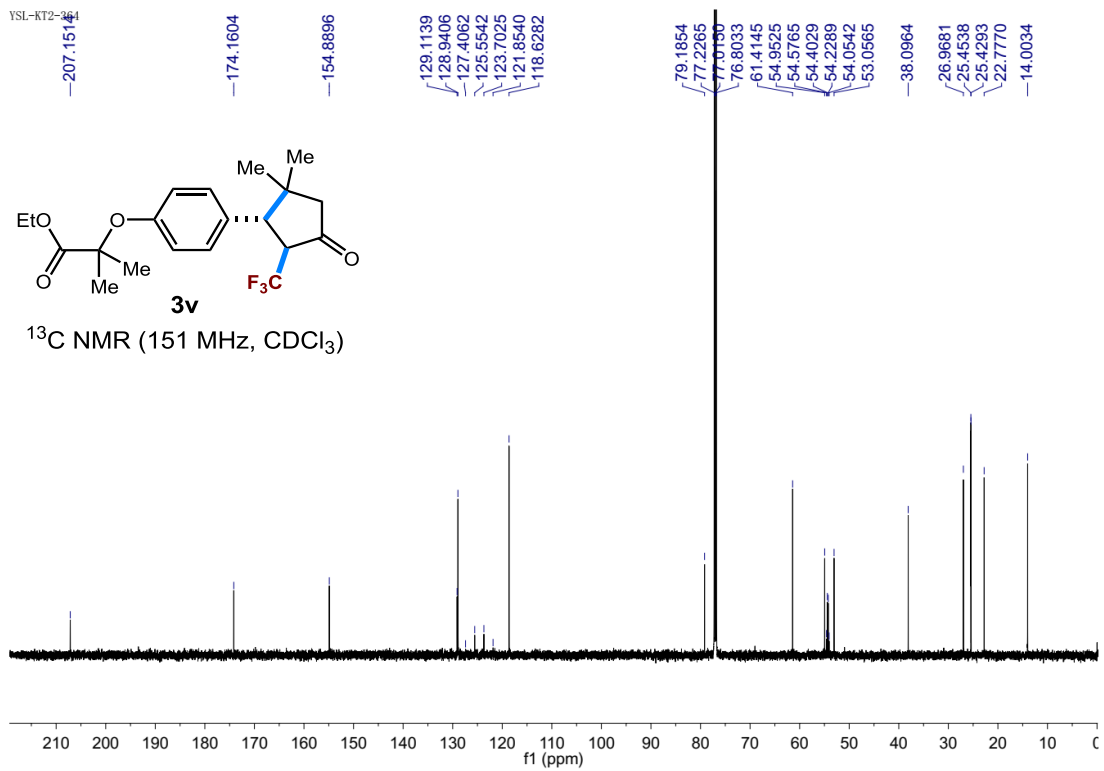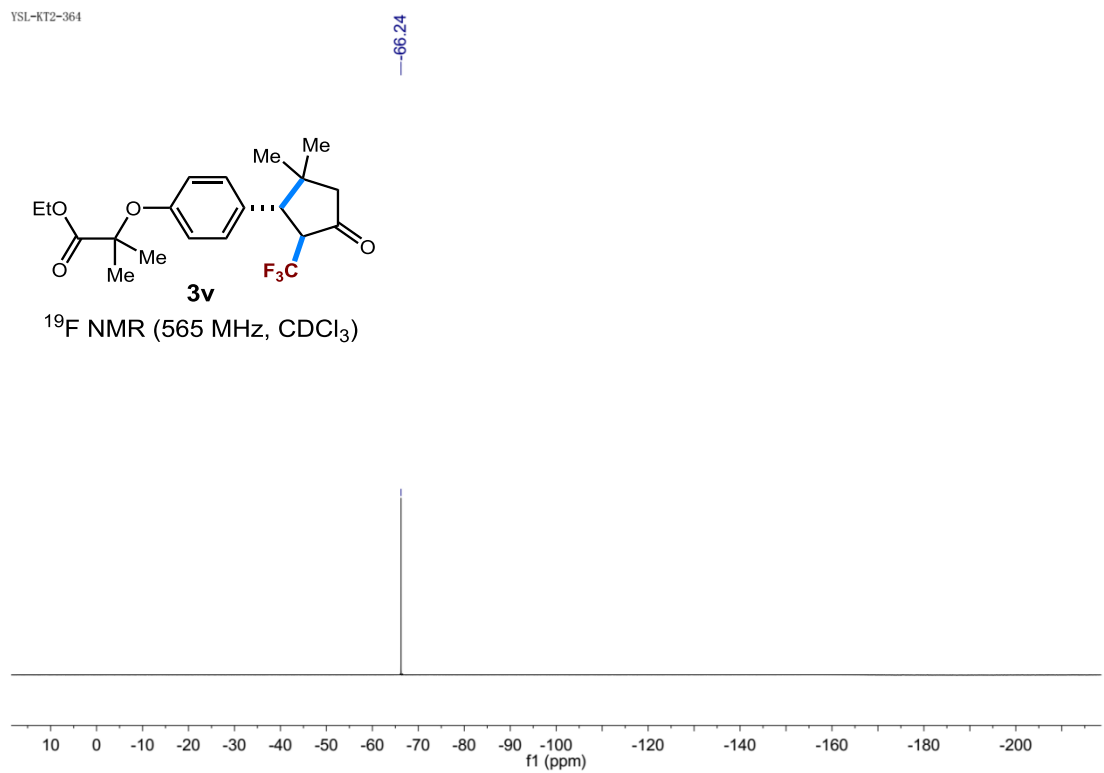

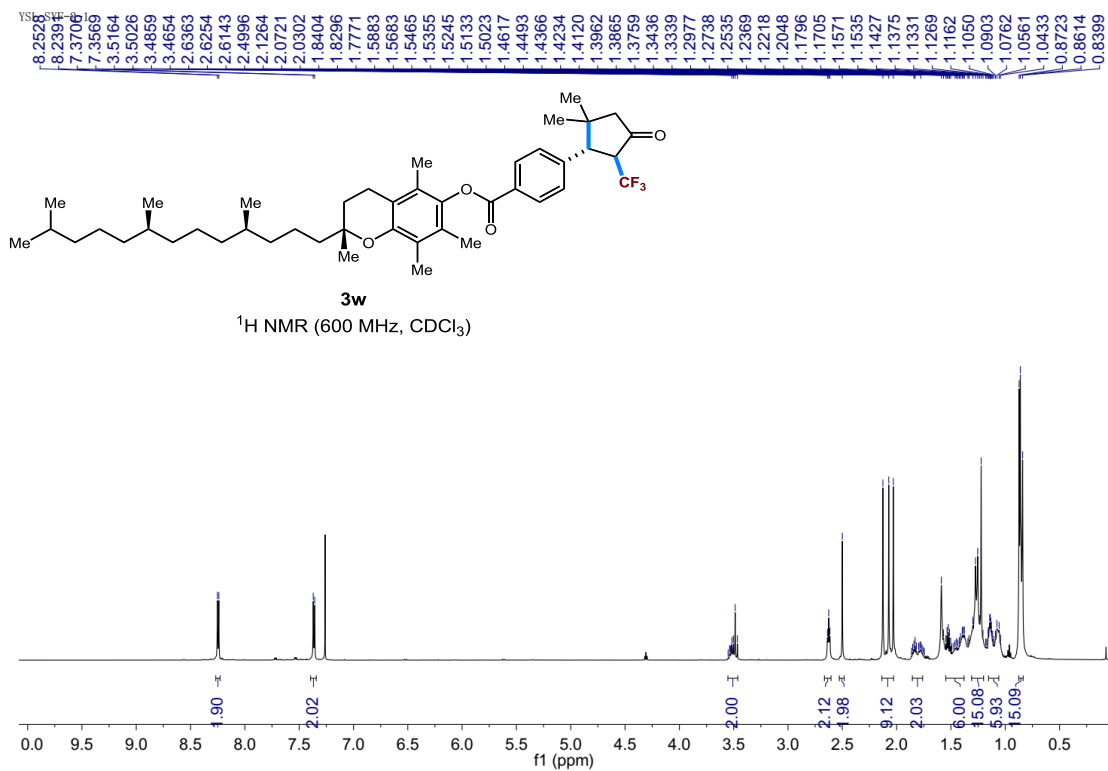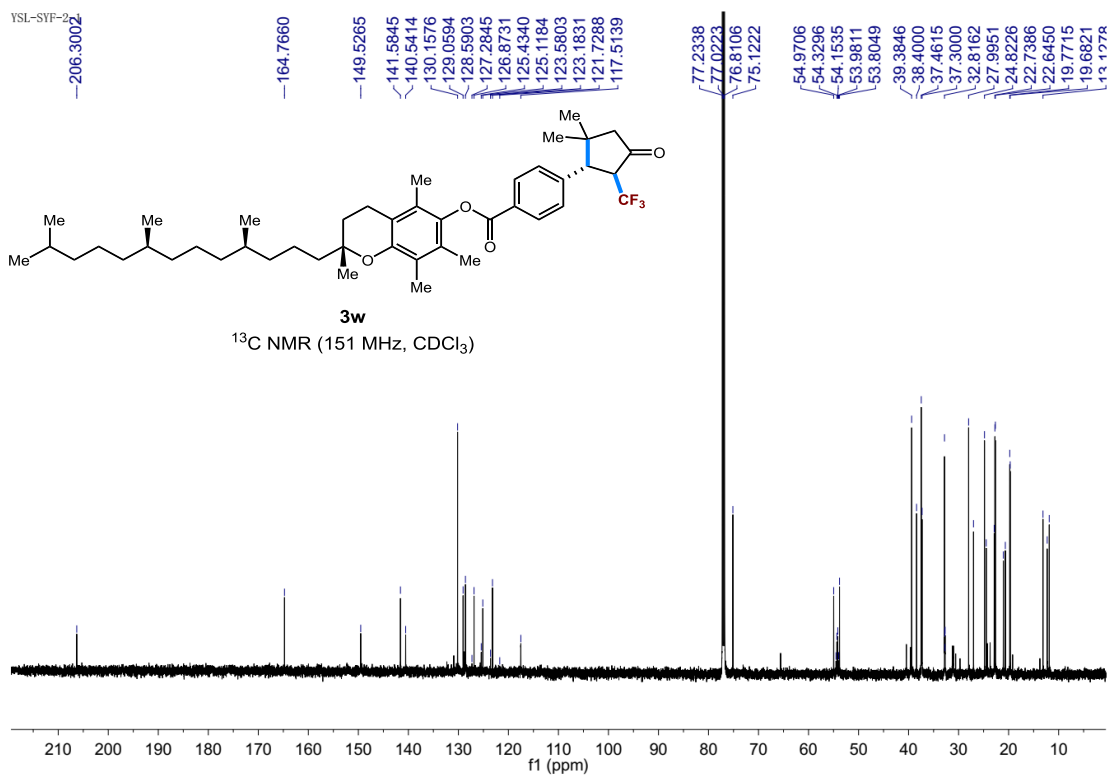

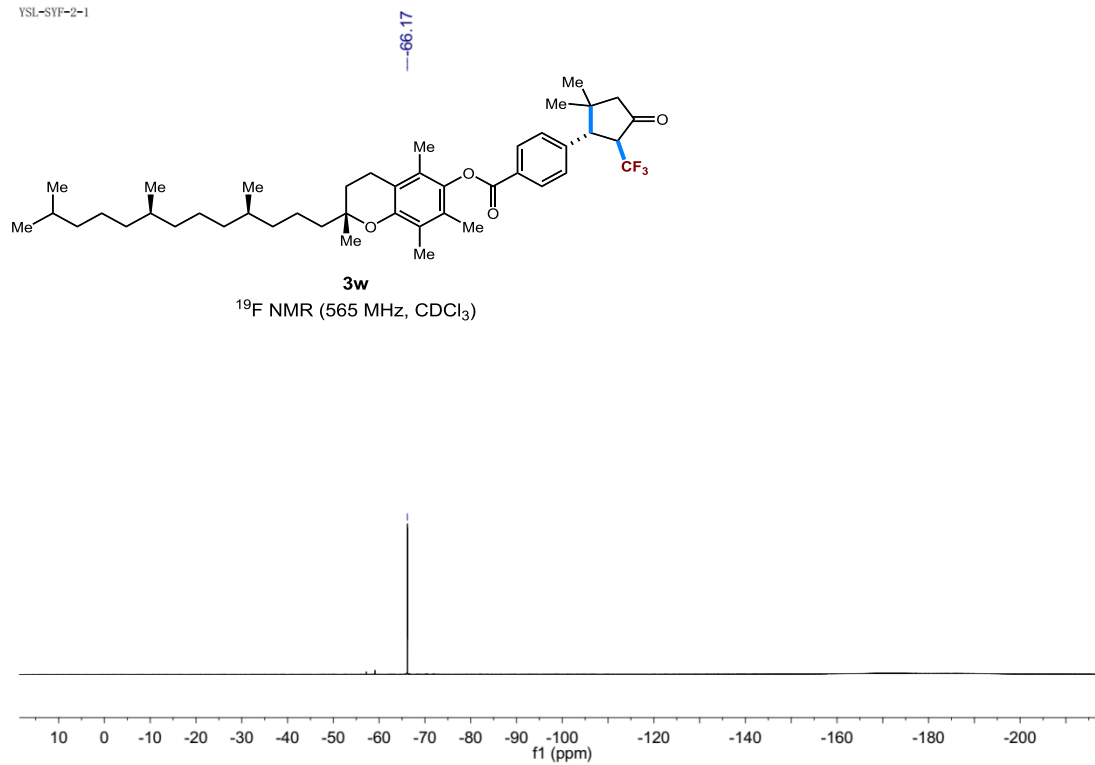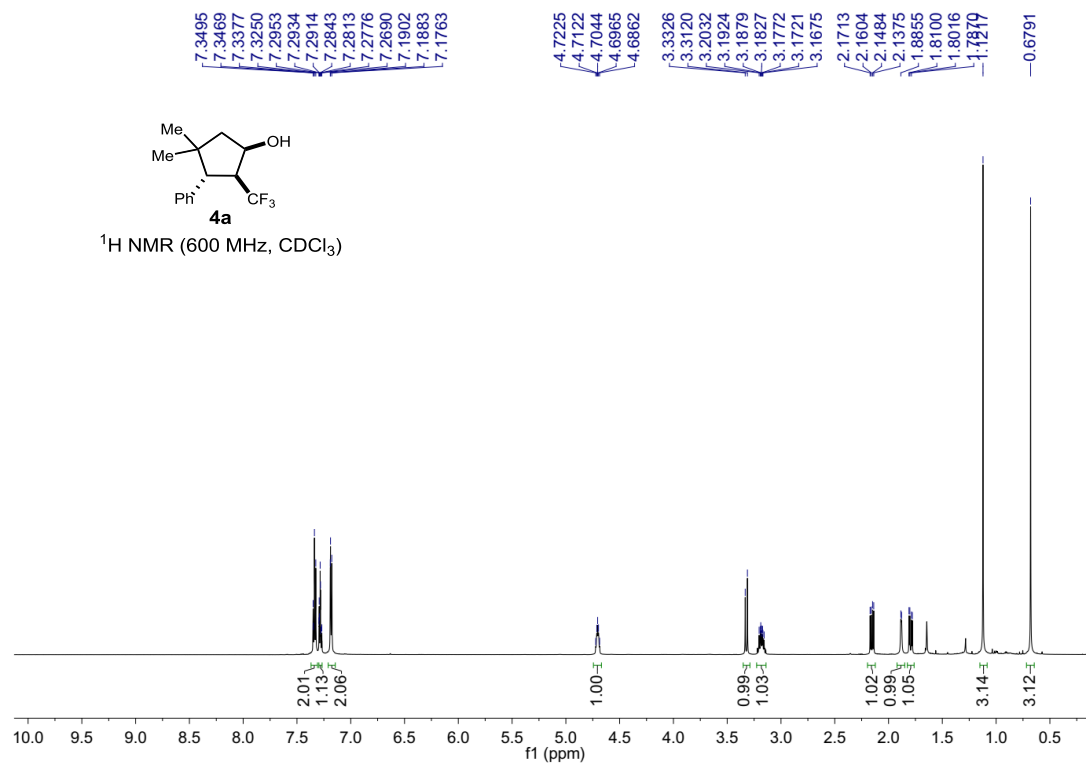

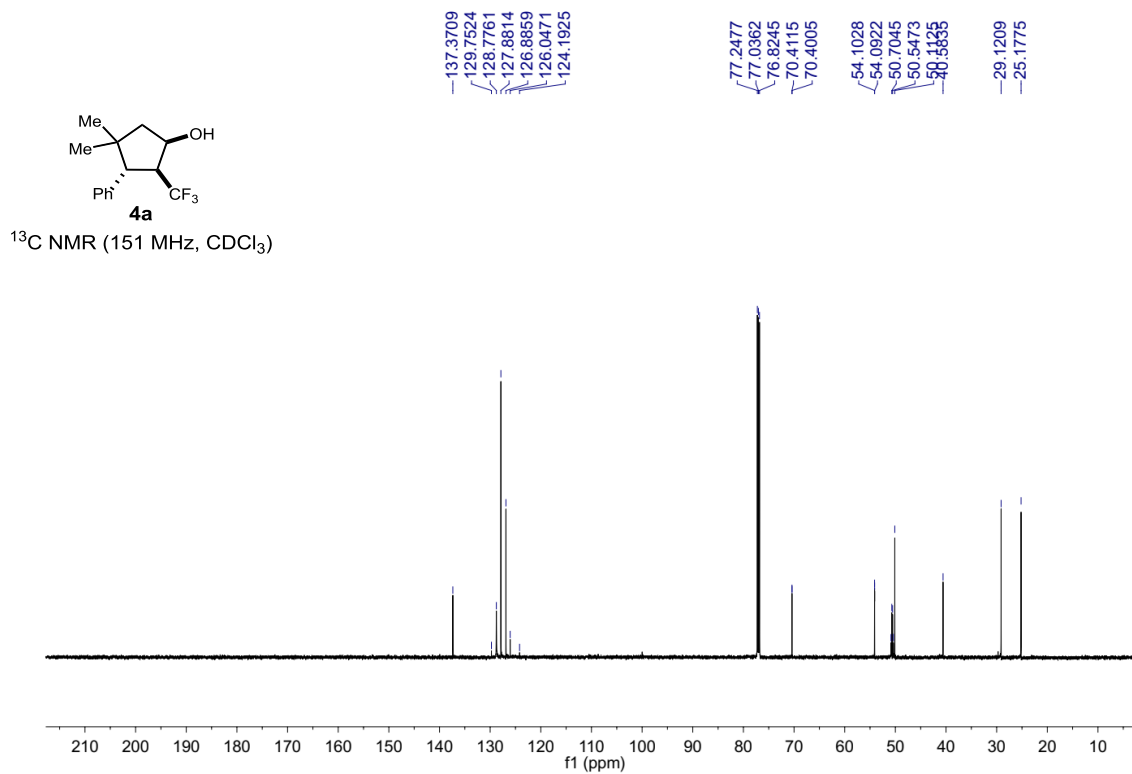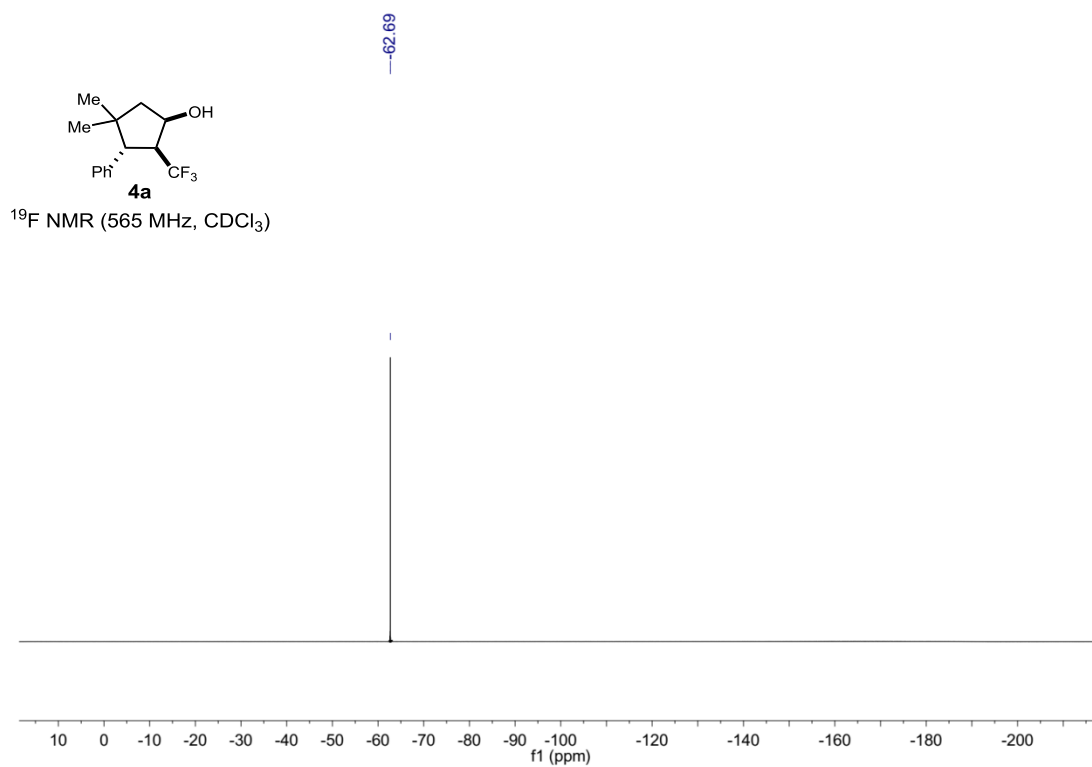

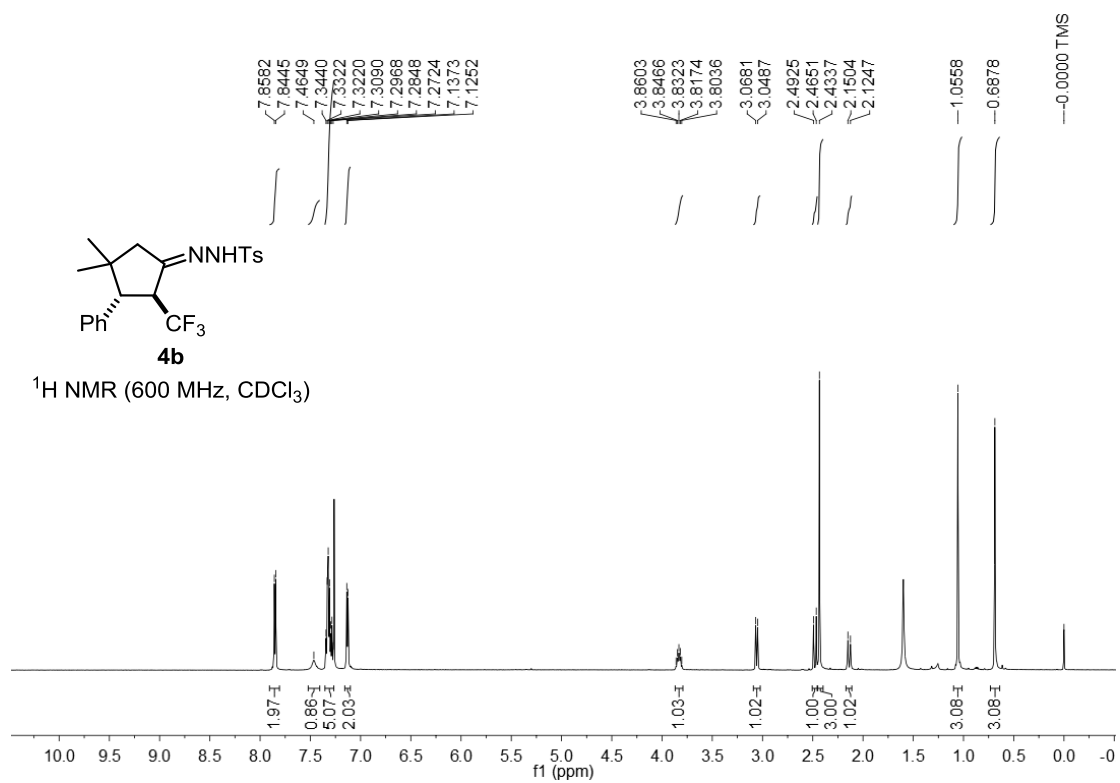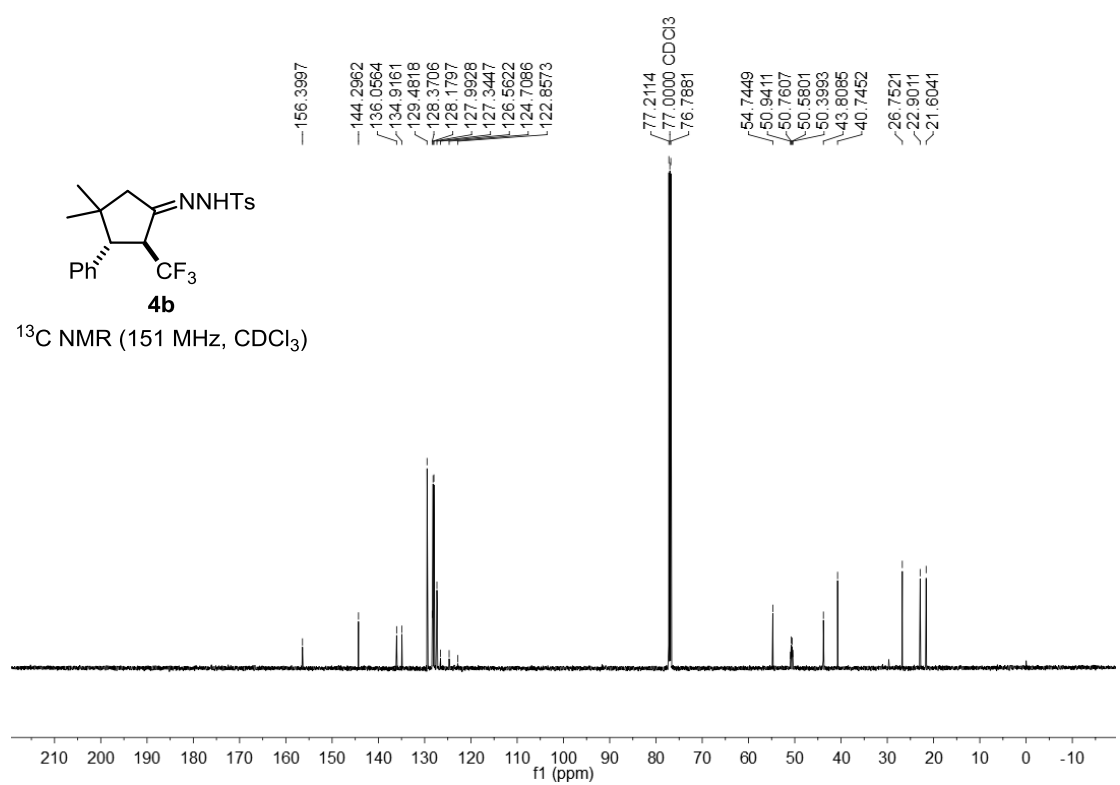

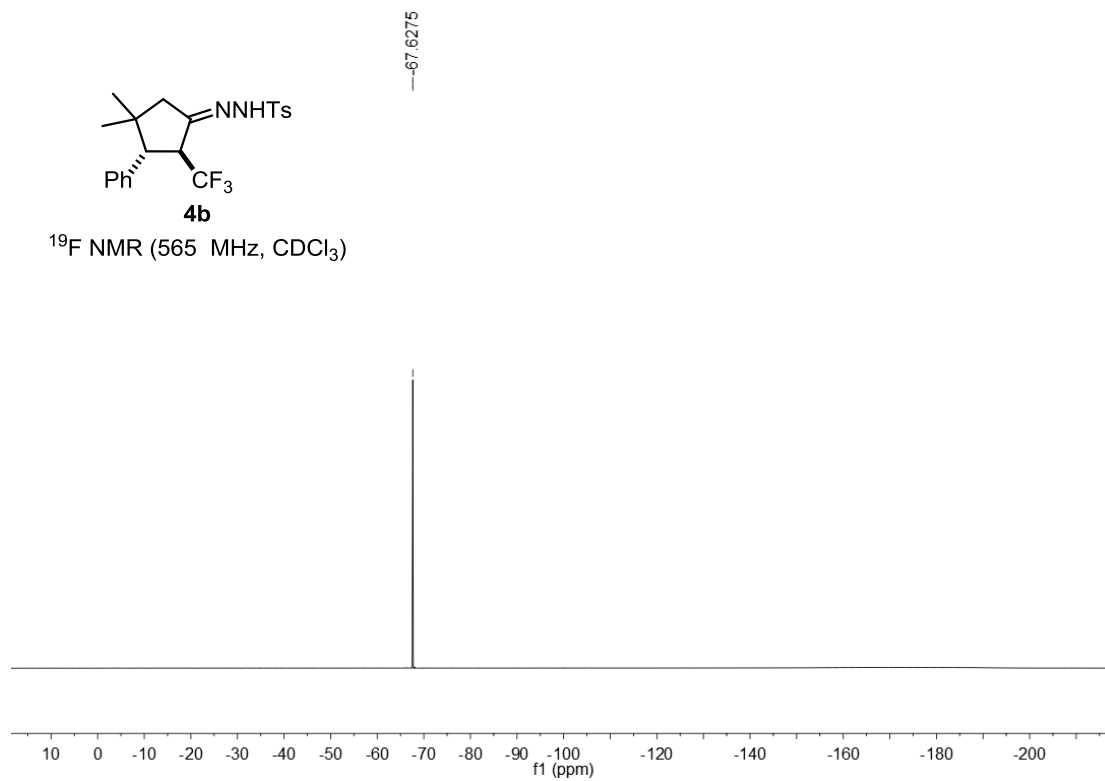

YSL-D-4

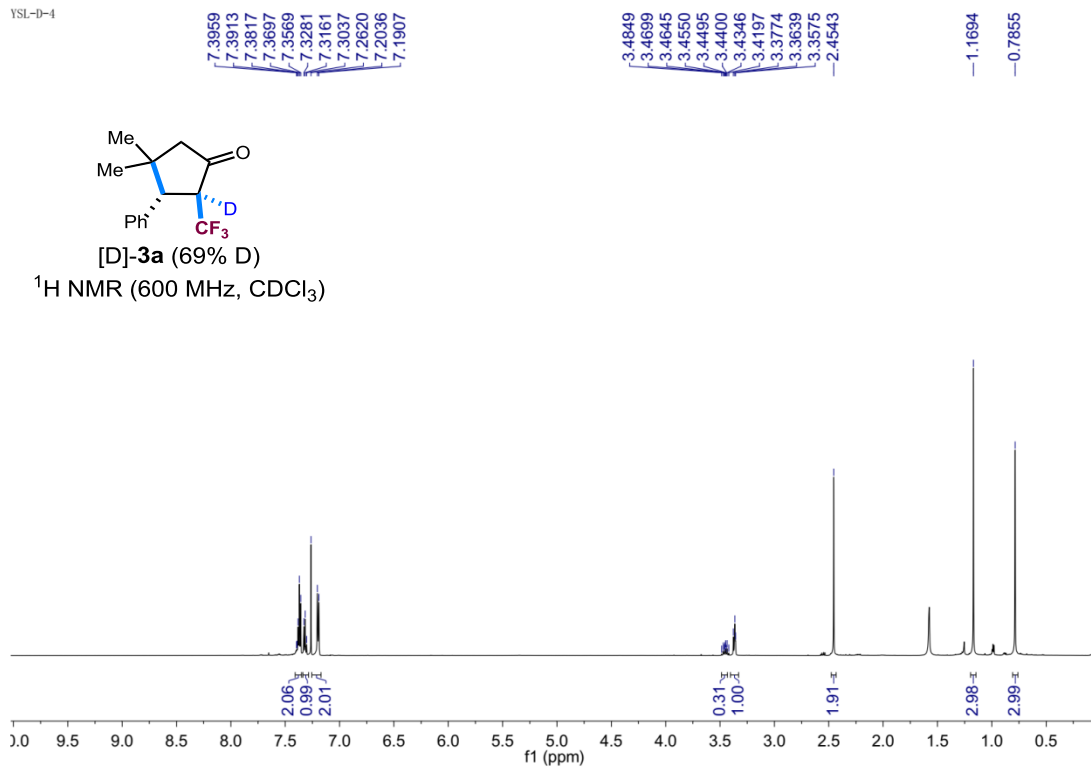

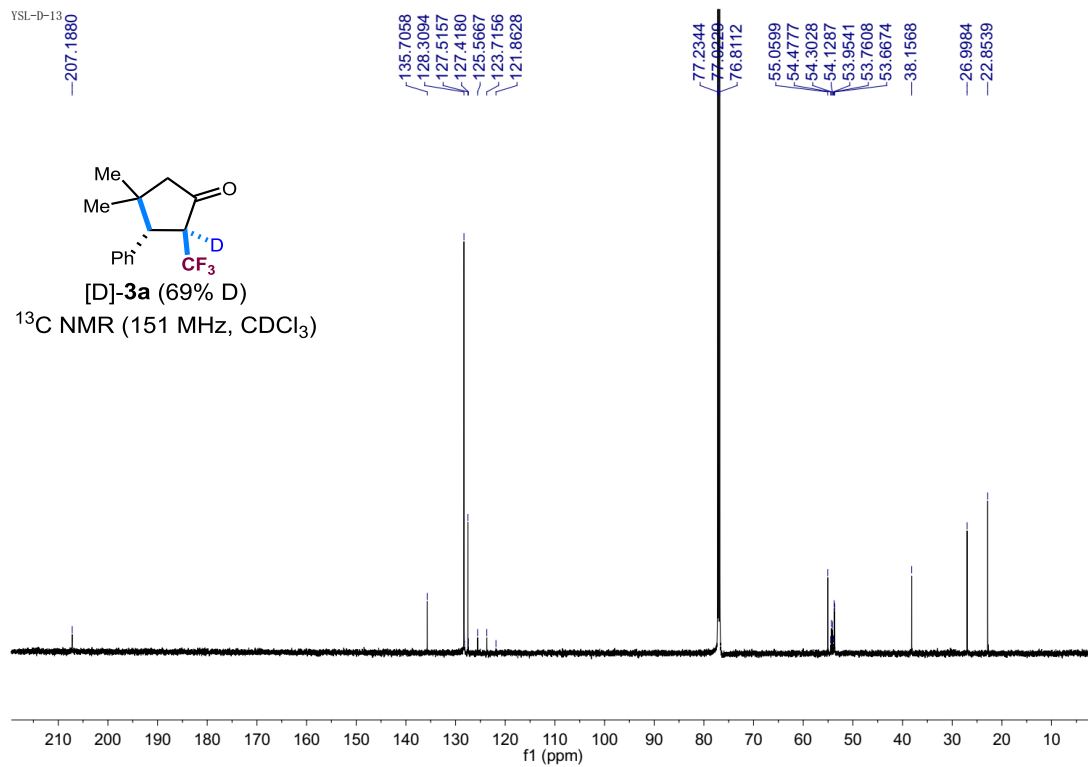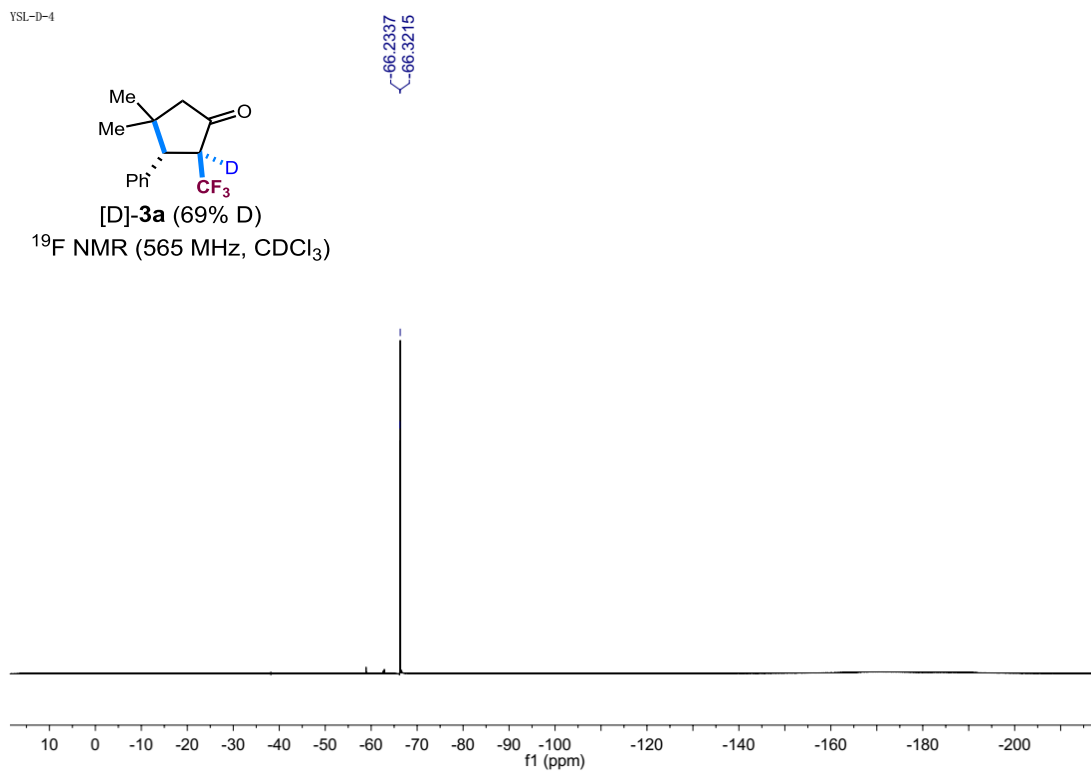

## 5. X-Ray Crystallographic Data

The crystal of **3a** was recrystallized in ethyl acetate/petroleum ethers via slow evaporation at room temperature. Crystal data for **3a** (C<sub>14</sub>H<sub>15</sub>F<sub>3</sub>O, 256.26): monoclinic, space group P2(1),  $a = 6.1123(5)$  Å,  $b = 7.4620(5)$  Å,  $c = 13.8843(11)$  Å,  $\beta = 96.134(3)$ ,  $U = 629.64(8)$  Å<sup>3</sup>,  $Z = 2$ ,  $T = 250$  K, absorption coefficient 0.114 mm<sup>-1</sup>, reflections collected 2811, independent reflections 2560 [ $R(\text{int}) = 0.0215$ ], refinement by full-matrix least-squares on  $F^2$ , data/restraints/parameters 2560/1/165, goodness-of-fit on  $F^2 = 1.027$ , final  $R$  indices [ $I > 2s(I)$ ]  $R_1 = 0.0334$ ,  $wR_2 = 0.0805$ , largest diff peak and hole 0.152 and -0.097 e.Å<sup>-3</sup>. Crystallographic data for the structure **3a** have been deposited with the Cambridge Crystallographic Data Centre as supplementary publication no. CCDC 2114641.

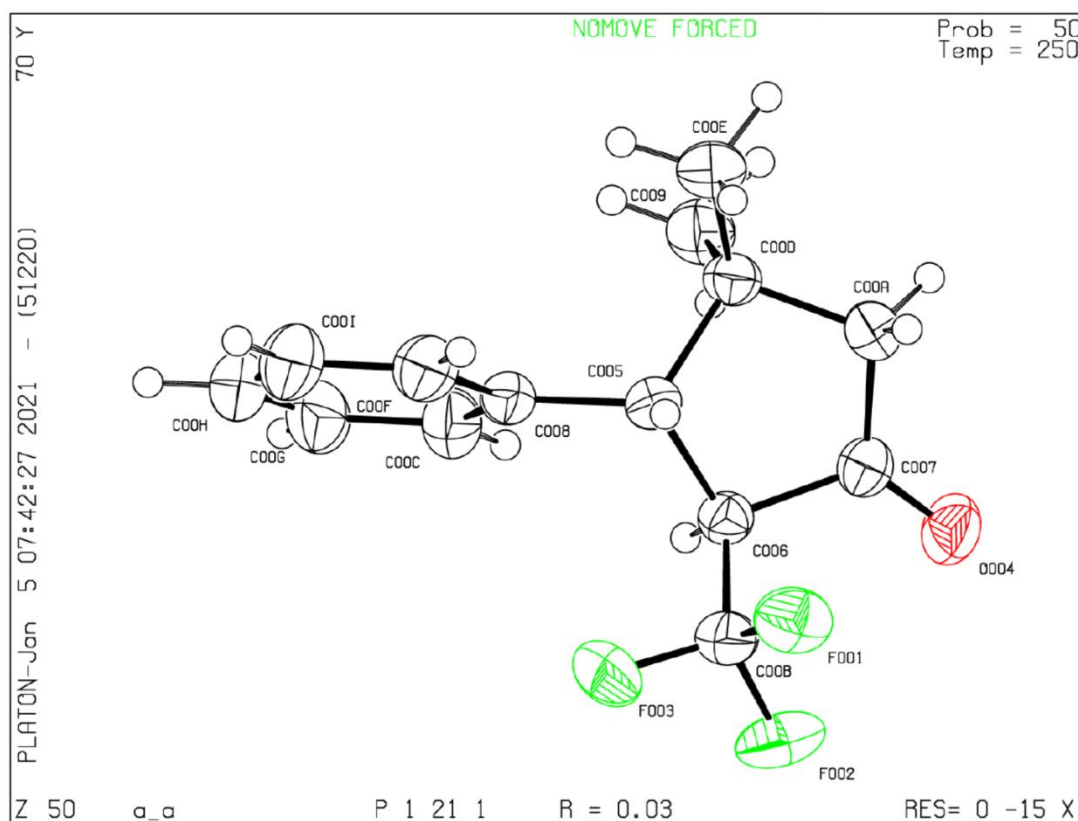

Supplement: d2qo01101h1.pdf [file d2qo01101h1.pdf]
